# Supplementary material for: Factors associated with immune responses to SARS-CoV-2 vaccination in individuals with autoimmune diseases
Source: JCI Insight. 2024 Jun 4;9(13):e180750. doi: 10.1172/jci.insight.180750 (PMC11383356; doi:10.1172/jci.insight.180750)
Supplement: Supplemental data set 1 [file jciinsight-9-180750-s101.xlsx]

## Sheet: T cell AIM
CD4 COV 22	CD8 COV22	Visit	Study Subject ID	Treatment	Anti Spike IgG	Covid status C or NC
0.934	1.28	Post B1	500940	MTX	135	NC
0.15	0.22	Post B1	ACE-MS-001/e	B Cell Depletion	0.4	NC
0.56	5.841	Post B1	ACE-MS-004/e	B Cell Depletion	108	NC
2.06	0.54	Post B1	ACE-MS-007/e	B Cell Depletion	0.4	NC
0.68	1.859	Post B1	ACE-MS-012/e	B Cell Depletion	0.4	NC
0.54	2.495	Post B1	ACE-MS-032/e	B Cell Depletion	13658	NC
1.71	3.58	Post B1	ACE-MS-043/e	B Cell Depletion	0.4	NC
1.04	0.66	Post B1	ACE-MS-058/e	B Cell Depletion	2840	NC
0.33	0.426	Post B1	ACE-MS-066/e	B Cell Depletion	0.4	NC
5.12	20.77	Post B1	ACE-MS-067/e	B Cell Depletion	18.3	NC
0.79	0.67	Post B1	ACE-MS-072/e	B Cell Depletion	2.33	NC
1.32	0.86	Post B1	ACE-MS-077/e	B Cell Depletion	357	NC
0.91	0.73	Post B1	ACE-MS-079/e	B Cell Depletion	0.4	NC
1.28	0.9	Post B1	ACE-MS-080/e	B Cell Depletion	0.4	NC
1.77	4.68	Post B1	ACE-MS-082/e	B Cell Depletion	14.3	NC
0.47	0.31	Post B1	ACE-MS-084/e	B Cell Depletion	242	NC
1.069	0.577	Post B1	ACE-MS-090/e	B Cell Depletion	7.54	NC
0.708	0.078	Post B1	ACE-MS-092/e	B Cell Depletion	1307	NC
0.41	0.1	Post B1	ACE-MS-095/e	B Cell Depletion	198	NC
3.99	0.78	Post B1	ACE-MS-132/e	B Cell Depletion	12477	NC
0.38	0.392	Post B1	ACE-P-001b*	B Cell Depletion	8982	NC
2.31	1.04	Post B1	ACE-P-002b*	B Cell Depletion	83200	NC
1.4	1.84	Post B1	ACE-P-004b*	B Cell Depletion	0.4	NC
0.21	0	Post B1	ACE-P-005b*	B Cell Depletion	9899	NC
2.92	0.71	Post B1	ACE-P-006b*	None	760	NC
1.24	1.193	Post B1	ACE-P-008b*	B Cell Depletion	102100	NC
1.03	0	Post B1	ACE-P-009b*	B Cell Depletion	48400	NC
0.078	0	Post B1	ACE-P-010b*	B Cell Depletion	7530	C
0.49	0.177	Post B1	ACE-P-011b*	B Cell Depletion	48800	NC
0.604	0.356	Post B1	ACE-P-012b*	MMF	114500	NC
1.32	0.277	Post B1	ACE-P-014b*	B Cell Depletion	31.9	NC
1.48	1.85	Post B1	ACE-P-015b*	B Cell Depletion	5521	NC
0.12	0	Post B1	ACE-P-018b*	B Cell Depletion	20269	NC
0.001	0	Post B1	ACE-P-019b*	B Cell Depletion		NC
0.63	0.78	Post B1	ACE-P-021b*	B Cell Depletion	72	NC
0.89	0	Post B1	ACE-P-024b*	B Cell Depletion	165000	NC
1.06	0.29	Post B1	ACE-P-025b*	Other	16159	NC
0.86	0.29	Post B1	ACE-P-026b*	B Cell Depletion	53400	NC
0.06	0.03	Post B1	ACE-P-027b*	B Cell Depletion		NC
0.07	0	Post B1	B002	B Cell Depletion	0.4	NC
0.989	0	Post B1	B021	B Cell Depletion	7430	NC
0.049	0.068	Post B1	E3311	Other	242	NC
0.536	0	Post B1	E3345	MTX + Adalimumab	14872	NC
0.22	0.13	Post B1	E3646	Leflunomide	16561	NC
0.109	0.08	Post B1	E3708	B Cell Depletion	0.4	NC
0.725	0.159	Post B1	F001	MMF	2699	NC
2.4	0.741	Post B1	F072	Other	9280	NC
0.26	0.036	Post B1	F097	None	3934	NC
0.79	1.849	Post B1	F124	MMF	16599	C
0.401	0.129	Post B1	F150	MTX	108300	NC
0.26	0	Post B1	F155	Other	129300	C
1.55	0	Post B1	F294	B Cell Depletion	0.4	NC
8.226	21.664	Post B1	F310	MMF	35600	C
0.151	0.018	Post B1	F323	B Cell Depletion + MMF Not Taking	142200	NC
0	0	Post B1	F328	MMF Not taking	179800	NC
1.58	0	Post B1	F354	MMF	33050	NC
0.07	0.11	Post B1	F355	MTX	24850	NC
1.056	0.65	Post B1	F440	Other	11900	NC
0	0	Post B1	F451	MMF Not Taking + Other	84690	NC
3.09	0.45	Post B1	F457	MMF Not taking	87680	NC
0.46	0.014	Post B1	F460	Other	18930	NC
0.86	0.087	Post B1	F485	MMF	5895	NC
0.28	0	Post B1	F498	MMF Not taking	57720	NC
16.04	0.542	Post B1	F503	MMF Not taking	45500	C
3.03	0.595	Post B1	F510	MMF	324	NC
2.5	0.064	Post B1	F620	Other	14820	NC
0.18	0.09	Post B1	F660	B Cell Depletion	14450	NC
4.16	3.51	Post B1	F661	MTX	50320	NC
0.641	0.21	Post B1	F671	MTX	317000	C
6.33	1.15	Post B1	F672	MTX	93.8	NC
2.76	0.78	Post B1	F691	Adalimumab	63200	C
0.23	0.34	Post B1	F692	MMF	19018	NC
0.025	0	Post B1	F694	MMF	0.4	NC
0.55	0.04	Post B1	F695	MMF	63970	NC
1.022	0.191	Post B1	F702	MTX	1680	NC
0.533	0.133	Post B1	R011	MTX	9310	NC
0	0.24	Post B1	R019	B Cell Depletion	12000	C
0.277	0.333	Post B1	R021	Other	35400	C
0.911	0.24	Post B1	R025	B Cell Depletion	188120	NC
3.3	0.743	Post B1	R027	Other	222590	NC
2.38	1.66	Post B1	R029	Other	246	C
1.162	0.716	Post B1	R033	MTX	2040	NC
0.095	0.011	Post B1	r040	MTX	2674	NC
0.79	1.05	Post B1	R042	B Cell Depletion	3.17	NC
3.239	9.72	Post B1	R046	MMF	38000	NC
0.57	0	Post B1	R063	MMF	74900	C
0.903	0.287	Post B1	R064	MMF	6.46	NC
0.093	0.15	Post B1	R072	Other	115	NC
0.1	0	Post B1	R086	MMF	0.49	NC
0.08	0.12	Post B1	R095	Adalimumab	3040	NC
1.23	0.12	Post B1	R103	Other	7860	NC
0.91	0.09	Post B1	R110	Other	19420	NC
0.072	0.038	Post B1	R111	MTX	46710	NC
0.11	3.412	Post B1	R117	B Cell Depletion	29740	NC
2.046	3.13	Post B1	R122	MMF	21881	NC
6.69	0.926	Post B1	R124	None	19550	NC
0.731	0.851	Post B1	R126	MTX	7051	NC
0.619	0	Post B1	R129	MMF	25	NC
1.41	0.63	Post B1	R130	MTX	5880	NC
1.31	1.97	Post B1	R131	MTX	21370	NC
1.02	0.512	Post B1	R134	MMF	21130	NC
1.269	1.161	Post B1	R149	B Cell Depletion	2308	NC
0.915	0.359	Post V1	100516	HC	170730	C
0.12	0.11	Post V1	100527	HC	46990	C
0.941	2.016	Post V1	100593	HC	84690	C
1.14	3.91	Post V1	100598	HC	>25000	C
0.42	0.194	Post V1	100689	HC	26160	C
2.85	0.33	Post V1	100760	HC	8690	C
1.12	0.37	Post V1	100763	HC	55160	C
1.09	0.76	Post V1	100768	HC	29190	C
0.452	0.14	Post V1	100789	HC	71810	C
2.09	0.5	Post V1	500861	MTX	198	C
1.25	0.2	Post V1	500877	B Cell Depletion	429	C
0.11	0	Post V1	500908	MTX	0.4	NC
2.908	0.756	Post V1	500936	MMF	2422	C
2.89	0.228	Post V1	533079	MMF	382	C
3.78	1.99	Post V1	575296	B Cell Depletion	0.4	C
2.22	5.03	Post V1	ACE-MS-062/b	B Cell Depletion	0.4	C
1.265	1.915	Post V1	ACE-P-010b	B Cell Depletion	102	C
1.4	0.171	Post V1	ACE-P-013b	B Cell Depletion	3011	C
0.3	0.16	Post V1	B009	MMF	891	C
0.284	0.014	Post V1	B027	B Cell Depletion	16550	C
0.58	0	Post V1	B028	B Cell Depletion + MMF Not Taking	84360	C
0.17	0.28	Post V1	B051	MMF Not Taking + Other	9580	C
0.355	0	Post V1	B062	Other	92510	C
0	0.007	Post V1	B066	MMF Not taking	35910	C
0	0	Post V1	E1974	B Cell Depletion	221	C
1.23	0.524	Post V1	E2143	B Cell Depletion	10.94	C
0.058	0.26	Post V1	E3588	MMF Not taking	1717	C
0.14	0	Post V1	F104	MMF Not taking	24710	C
0	0.22	Post V1	F124	MMF	18400	C
1.35	0.154	Post V1	F155	Other	50620	C
0.389	0.01	Post V1	F158	MTX	3360	C
0.35	0	Post V1	F242	None	134	C
1.605	0.808	Post V1	F310	MMF	37460	C
0.1	0.043	Post V1	F371	MMF	46900	C
0.102	0.02	Post V1	F437	None	10910	C
0.3	0.06	Post V1	F451	MMF Not Taking + Other	117	NC
1.51	0.08	Post V1	F470	Other	1500	C
0	0	Post V1	F475	MMF	11440	C
0.1	0.057	Post V1	F485	MMF	3790	C
1.14	1.091	Post V1	F498	MMF Not taking	3370	C
12.85	4.15	Post V1	F503	MMF Not taking	14520	C
1.467	1.541	Post V1	F509	MMF	51420	C
1.3	0.176	Post V1	F510	MMF	13.5	NC
0	0.07	Post V1	f654	B Cell Depletion	6120	C
4.09	0.29	Post V1	f659	MMF Not taking	18600	C
1.87	0.63	Post V1	F666	MTX	197	NC
4.1	1.38	Post V1	F670	MMF	23920	C
1.441	0.38	Post V1	F701	MTX	13810	C
3.059	0.148	Post V1	F705	MMF	10580	C
0.23	0.03	Post V1	F707	MTX	12890	C
3.56	1.15	Post V1	R001	Etanercept	11964	NC
0.001	0	Post V1	R021	Other	5980	C
0.745	0.241	Post V1	R023	MTX	266	NC
1.33	0.53	Post V1	R035	B Cell Depletion	61270	C
5.47	4.59	Post V1	R053	MMF	109500	C
1.52	0.118	Post V1	R060	B Cell Depletion + MMF	68.9	C
0	0.06	Post V1	R080	B Cell Depletion	10.3	C
0.23	0	Post V1	R082	MTX	15450	C
0.58	0	Post V1	R092	Other	1150	C
0.51	0	Post V1	R106	B Cell Depletion	50710	NC
0.137	0.048	Post V1	R149	B Cell Depletion	1.24	NC
0.788	0.104	Post V1	100521	HC	25000	NC
0.139	0.029	Post V1	100533	HC	897	NC
0.68	0	Post V1	100648	HC	1390	NC
1.209	0.415	Post V1	100668	HC	775	NC
2.27	0.91	Post V1	100685	HC	1700	NC
1.355	0.292	Post V1	100687	HC	1400	NC
0.817	0.53	Post V1	100688	HC	2630	NC
0	0	Post V1	100700	HC	4980	NC
0.223	0	Post V1	100705	HC	284	NC
0.282	0.072	Post V1	100710	HC	1580	NC
1.38	0.17	Post V1	100734	HC	1020	NC
0.218	0.54	Post V1	100879	HC	4980	NC
0.85	0.136	Post V1	500022	MMF	377	NC
2.02	0.94	Post V1	500026	Other	913	NC
2.95	1.22	Post V1	500041	Other	369	NC
2.06	0.79	Post V1	500497	MMF	47.8	NC
0.39	0	Post V1	500499	Other	80.3	NC
1.74	0.55	Post V1	500902	MTX	1156	NC
0.5	0.085	Post V1	500909	MTX	494	NC
0.73	0.19	Post V1	500915	MTX	1045	NC
0.68	0.054	Post V1	500937	MMF	73.3	NC
1.1	0.895	Post V1	500940	MTX	1844	NC
6.84	2.39	Post V1	575065	B Cell Depletion	21.5	NC
0.22	0.1	Post V1	575188	B Cell Depletion	986	NC
3.06	0.411	Post V1	575572	B Cell Depletion	1625	NC
3.89	1.29	Post V1	575747	B Cell Depletion	6.86	NC
0.63	9.29	Post V1	575759	B Cell Depletion	1794	NC
1.14	0.89	Post V1	598710	Other	354	NC
0.282	0.03	Post V1	ACE-MS-001/b	B Cell Depletion	0.4	NC
0.212	0.142	Post V1	ACE-MS-002/b	B Cell Depletion	0.4	NC
1.88	3.06	Post V1	ACE-MS-003/b	B Cell Depletion	60	NC
0.54	2.77	Post V1	ACE-MS-004/b	B Cell Depletion	10.3	NC
0.39	0.365	Post V1	ACE-MS-005/b	B Cell Depletion	0.4	NC
0.82	0.251	Post V1	ACE-MS-006/b	B Cell Depletion	25.6	NC
1.59	0.7	Post V1	ACE-MS-007/b	B Cell Depletion	0.4	NC
1.02	0.1	Post V1	ACE-MS-012/b	B Cell Depletion	0.4	NC
0.48	2.18	Post V1	ACE-MS-031/b	B Cell Depletion	0.4	NC
0.58	0.39	Post V1	ACE-MS-032/b	B Cell Depletion	27.3	NC
0.29	2.02	Post V1	ACE-MS-043/b	B Cell Depletion	0.4	NC
1.1	0.574	Post V1	ACE-MS-058/b	B Cell Depletion	50.7	NC
0.37	0	Post V1	ACE-MS-061/b	B Cell Depletion	0.4	NC
0.01	0.06	Post V1	ACE-MS-063/b	B Cell Depletion	0.4	NC
1.52	1.86	Post V1	ACE-MS-065/b	B Cell Depletion	5.53	NC
0.79	0.461	Post V1	ACE-MS-066/b	B Cell Depletion	0.4	NC
1.65	6.73	Post V1	ACE-MS-067/b	B Cell Depletion	0.4	NC
1.08	0.424	Post V1	ACE-MS-068/b	B Cell Depletion	161	NC
1.34	1.36	Post V1	ACE-MS-070/b	B Cell Depletion	0.4	NC
0.66	0.12	Post V1	ACE-MS-072/b	B Cell Depletion	0.78	NC
0.97	1.04	Post V1	ACE-MS-077/b	B Cell Depletion	6.44	NC
0.778	0.562	Post V1	ACE-MS-079/b	B Cell Depletion	0.4	NC
1.681	0.482	Post V1	ACE-MS-080/b	B Cell Depletion	0.4	NC
2.07	1.942	Post V1	ACE-MS-082/b	B Cell Depletion	10.9	NC
0.92	1.69	Post V1	ACE-MS-083/b	B Cell Depletion	0.4	NC
0.76	0.18	Post V1	ACE-MS-084/b	B Cell Depletion	0.4	NC
3	0.26	Post V1	ACE-MS-086/b	B Cell Depletion	340	NC
0.79	0.052	Post V1	ACE-MS-090/b	B Cell Depletion	3.13	NC
0.34	0	Post V1	ACE-MS-092/b	B Cell Depletion	1524	NC
0.06	0.31	Post V1	ACE-MS-095/b	B Cell Depletion	0.78	NC
0	0.32	Post V1	ACE-MS-099/b	Other	179	NC
2.87	0.277	Post V1	ACE-MS-132/b	B Cell Depletion	180	NC
0.063	0.1	Post V1	ACE-P-001b	B Cell Depletion	28.2	NC
4.17	2.225	Post V1	ACE-P-002b	B Cell Depletion	2265	NC
1.615	1.535	Post V1	ACE-P-003b	B Cell Depletion	2.99	NC
3.29	2.18	Post V1	ACE-P-004b	B Cell Depletion	0.4	NC
3.107	1.326	Post V1	ACE-P-005b	B Cell Depletion	1007	NC
2.13	3.86	Post V1	ACE-P-006b	None	5079	NC
0.12	0.134	Post V1	ACE-P-007b	None	2267	NC
0.175	0.439	Post V1	ACE-P-008b	B Cell Depletion	6712	NC
0.78	0.217	Post V1	ACE-P-009b	B Cell Depletion	5051	NC
0.75	0.257	Post V1	ACE-P-011b	B Cell Depletion	12289	NC
0.848	1.297	Post V1	ACE-P-012b	MMF	553	NC
0.545	0.174	Post V1	ACE-P-014b	B Cell Depletion	0.4	NC
0.89	0.83	Post V1	ACE-P-015b	B Cell Depletion	2049	NC
0.27	0.035	Post V1	ACE-P-016b	None	850	NC
1.16	0.23	Post V1	ACE-P-017b	B Cell Depletion	2247	NC
0.42	0.23	Post V1	ACE-P-018b	B Cell Depletion	2311	NC
0.218	0.08	Post V1	ACE-P-019b	B Cell Depletion	3479	NC
1.68	0.99	Post V1	ACE-P-020b	B Cell Depletion	7636	NC
0.895	0.235	Post V1	ACE-P-021b	B Cell Depletion	0.4	NC
0.037	0.085	Post V1	ACE-P-022b	Azathioprine	1009	NC
0.045	0.12	Post V1	ACE-P-023b	B Cell Depletion	1581	NC
3.41	1.749	Post V1	ACE-P-024b	B Cell Depletion	8456	NC
0.752	0.175	Post V1	ACE-P-025b	Other	114	NC
1.475	0.273	Post V1	ACE-P-026b	B Cell Depletion	8416	NC
1.31	2.95	Post V1	ACE-P-027b	B Cell Depletion	0.48	NC
1.64	0.8	Post V1	ACE-P-036b	B Cell Depletion	2814	NC
0.74	0.121	Post V1	B002	B Cell Depletion	12700	NC
0.128	0	Post V1	B013	MMF Not taking	14500	NC
1.05	0	Post V1	B021	B Cell Depletion	218100	NC
0.43	0.012	Post V1	B024	Other	0.4	NC
0.03	0.05	Post V1	B061	B Cell Depletion	181	NC
1.067	0.056	Post V1	B063	MMF Not Taking + Other	11320	NC
0.12	0.075	Post V1	B064	MMF	857	NC
0	0.083	Post V1	B067	MMF	2.53	NC
0	0.16	Post V1	E0407	Other	7.33	NC
0.379	0.154	Post V1	E0755	MMF	15568	NC
0.008	0	Post V1	E1156	MMF	457.5	NC
0.34	0.061	Post V1	E1748	MMF Not taking	1346	NC
0.1	0	Post V1	E2103	B Cell Depletion	0.88	NC
0	0	Post V1	E2150	Other	1519	NC
0.172	0.09	Post V1	E3001	B Cell Depletion + MMF	3873	NC
0.459	0.16	Post V1	E3311	Other	7038	NC
0.078	0	Post V1	E3331	MMF	394	NC
0.135	0.014	Post V1	E3338	Belimumab	482	NC
0.125	0	Post V1	E3345	MTX + Adalimumab	319	NC
0.12	0	Post V1	E3484	MMF	0.4	NC
0.006	0	Post V1	E3515	MTX	1164	NC
0.44	0.07	Post V1	E3523	B Cell Depletion	2243	NC
0.011	0	Post V1	E3577	B Cell Depletion + Other	5.24	NC
0.03	0	Post V1	E3630	MMF	182	NC
2.08	1.976	Post V1	E3702	B Cell Depletion + MMF Not Taking	0.8	NC
0.255	0.007	Post V1	F001	MMF	11.3	NC
0.96	0.118	Post V1	F004	None	55.7	NC
0.26	0	Post V1	F071	B Cell Depletion	703	NC
3.59	1.36	Post V1	F072	Other	522	NC
0.02	0	Post V1	F097	None	30.7	NC
0.09	0	Post V1	F120	B Cell Depletion + MMF	3.25	NC
0	0	Post V1	F135	MMF	124	NC
0.16	0.019	Post V1	F150	MTX	1700	NC
3.012	0.176	Post V1	F217	MMF	3900	NC
0.468	0.089	Post V1	F281	MMF	11130	NC
0.49	0.038	Post V1	F294	B Cell Depletion	0.4	NC
1.473	0.52	Post V1	F319	Other	7780	NC
1.385	0	Post V1	F323	B Cell Depletion + MMF Not Taking	278	NC
0.19	0.002	Post V1	F326	MMF	9530	NC
0.2	0.01	Post V1	F327	Azathioprine	584	NC
0.255	0.044	Post V1	F328	MMF Not taking	321	NC
0.11	0.106	Post V1	F354	MMF	25.4	NC
0.12	0	Post V1	F355	MTX	234	NC
1.32	0	Post V1	F372	MMF	7.28	NC
0.084	0.003	Post V1	F440	Other	72.6	NC
0.63	0.014	Post V1	F450	Belimumab	279	NC
0.82	0.23	Post V1	F457	MMF Not taking	913	NC
0.56	0	Post V1	F460	Other	26.3	NC
0.18	0.025	Post V1	F514	MMF	343	NC
0.17	0	Post V1	F620	Other	1730	NC
0.37	0.017	Post V1	F636	Other	1570	NC
0.115	0.123	Post V1	f655	None	28.5	NC
0.15	0.15	Post V1	F660	B Cell Depletion	302	NC
3.65	2.55	Post V1	F661	MTX	83.9	NC
1.075	0.507	Post V1	F671	MTX	3370	NC
3.57	0.93	Post V1	F672	MTX	37.4	NC
0.04	0.28	Post V1	f677	MTX	1410	NC
0.01	0	Post V1	F682	MTX	3160	NC
1.48	0.63	Post V1	F691	MTX + Adalimumab	2490	NC
0.07	0	Post V1	F692	MMF	96.4	NC
1.76	0.52	Post V1	F693	MTX	1180	NC
0.08	0.01	Post V1	F694	MMF	13420	NC
0.99	0.05	Post V1	F695	MMF	5760	NC
0.031	0	Post V1	F702	MTX	65.7	NC
0.03	0.35	Post V1	F712	MTX	445	NC
0	0.02	Post V1	F727	MTX	1.57	NC
0.51	0.25	Post V1	R005	B Cell Depletion	0.4	NC
0.03	0.2	Post V1	R006	Other	174	NC
0.82	0.08	Post V1	R007	MMF	1310	NC
1.51	2.11	Post V1	R010	MTX	872	NC
0.388	0.063	Post V1	R011	MTX	25	NC
3.793	2.134	Post V1	R014	B Cell Depletion	0.4	NC
0.49	0.407	Post V1	R017	B Cell Depletion	379	NC
0	0	Post V1	R019	B Cell Depletion	188	NC
0.044	0	Post V1	R025	B Cell Depletion	1210	NC
4	0.2	Post V1	R027	Other	248	NC
1.364	0.14	Post V1	R029	Other	0.4	NC
0.826	0.575	Post V1	R033	MTX	91.4	NC
0.121	0.011	Post V1	R034	Other	652	NC
1.09	0.064	Post V1	r037	B Cell Depletion	0.4	NC
0.726	0.139	Post V1	r038	MTX	319	NC
0.04	0	Post V1	r040	MTX	208	NC
0.94	1.2	Post V1	R041	B Cell Depletion	1730	NC
0.745	0.37	Post V1	R042	B Cell Depletion	0.4	NC
1.1	0.42	Post V1	R043	MMF	0.4	NC
1.534	1.38	Post V1	R046	MMF	568	NC
0	0.01	Post V1	R049	B Cell Depletion	57.5	NC
0.65	0.38	Post V1	R054	B Cell Depletion	2.46	NC
1.211	0.187	Post V1	R059	MMF	47.3	NC
1.15	0.46	Post V1	R063	MMF	286	NC
0.59	0.135	Post V1	R064	MMF	0.4	NC
0.6	0.039	Post V1	R065	MMF	347	NC
0.04	0.03	Post V1	R067	Other	24.3	NC
1.55	0.06	Post V1	R069	B Cell Depletion	9.11	NC
0.14	0.058	Post V1	R072	Other	7.93	NC
0.799	0.022	Post V1	R075	MMF	259	NC
5.11	0.46	Post V1	R076	MMF	68.4	NC
0	0	Post V1	R086	MMF	0.4	NC
0.068	0.02	Post V1	R087	B Cell Depletion	2420	NC
0.01	0	Post V1	R091	MMF	0.45	NC
0.99	0.86	Post V1	R093	Other	0.4	NC
0.105	0.066	Post V1	R095	MTX + Adalimumab	277	NC
0.36	0	Post V1	R101	MMF	101	NC
1.331	0.234	Post V1	R103	Other	175	NC
0.09	0	Post V1	R105	MTX	332	NC
0.1	0.05	Post V1	R107	Other	0.4	NC
1.36	0.31	Post V1	R110	Other	361	NC
0.613	0.252	Post V1	R111	MTX	753	NC
0	0	Post V1	R112	B Cell Depletion	1.19	NC
0.38	0.04	Post V1	R115	B Cell Depletion	18	NC
0.11	0.15	Post V1	R117	B Cell Depletion	0.96	NC
8.07	1.08	Post V1	R118	MTX	792	NC
0.502	0.32	Post V1	R121	B Cell Depletion	1010	NC
1.279	0.313	Post V1	R122	MMF	16.7	NC
2.75	0.15	Post V1	R124	None	133	NC
2.5	0.8	Post V1	R125	MTX	2040	NC
0.54	0.64	Post V1	R126	MTX	3630	NC
6.22	2.34	Post V1	R128	MTX	4480	NC
0.19	0	Post V1	R129	MMF	0.4	NC
2.18	0.82	Post V1	R130	MTX	130	NC
1.31	1.77	Post V1	R131	MTX	1870	NC
0.02	0	Post V1	R133	MTX	46.8	NC
0	0	Post V1	R134	MMF	0.4	NC
0.04	0.161	Post V1	R136	MTX	940	NC
0.9	0.032	Post V1	R144	MMF	199	NC
0	0	Post V1	R145	None	20.9	NC
0.65	0.11	Post V1	R147	MTX	1110	NC
2.05	1.52	Post V1	R148	MMF	769	NC
0.04	0	Pre B	E3646	Leflunomide	1547	NC
0.018	0.019	Pre V	B001	B Cell Depletion	1.47	C
0.72	0	Pre V	B027	B Cell Depletion	153	C
0	0.01	PreV	500861	MTX	12137	C
1.92	0.18	PreV	500877	B Cell Depletion	1.05	NC
0.03	0	PreV	500908	MTX	16503	C
4.71	0.246	PreV	533079	MMF	48100	C
0.97	0.21	PreV	ACE-MS-009	None	44.6	C
9	0.84	PreV	ACE-MS-027	Glatiramer	13361	NC
1.32	0.099	PreV	ACE-MS-134	IFN beta	333	NC
1.89	0.304	PreV	E2143	B Cell Depletion	5.43	C
0.026	0	PreV	E3588	MMF Not taking	37300	C
0	0	PreV	F124	MMF	117	C
0	0	PreV	F158	MTX	35.2	C
0.003	0	PreV	F242	None	0.4	C
0.05	0	PreV	F371	MMF	531	C
0.59	2.25	PreV	F470	Other	0.43	C
0.034	0.015	PreV	F498	MMF Not taking	0.4	C
1.61	0.053	PreV	F503	MMF Not taking	6460	C
0.31	0.27	PreV	F509	MMF	231	C
0.37	0.04	PreV	f659	MMF Not taking	42.9	C
0.25	0.057	PreV	F670	MMF	1750	C
0.06	0.34	PreV	F707	MTX	195	C
0.33	0	PreV	R035	B Cell Depletion	515	C
0.57	0.09	PreV	R053	MMF	901	C
0.003	0	PreV	R060	B Cell Depletion + MMF	0.4	NC
0	0	PreV	R080	B Cell Depletion	0.4	NC
0.53	0.085	PreV	R082	MTX	82.5	C
0.18	0.2	PreV	R092	Other	6.98	C
0	0	Pre V	B002	B Cell Depletion	86400	NC
0	0	PreV	B024	Other	127	NC
0	0	PreV	E1156	MMF	0.4	NC
0	0	PreV	F001	MMF	0.4	NC
0.85	0	PreV	F004	None	0.4	NC
0.18	0.706	PreV	F072	Other	0.4	NC
0	0	PreV	F120	B Cell Depletion + MMF	0.4	NC
0	0	PreV	F150	MTX	0.4	NC
0.04	0	PreV	F323	B Cell Depletion + MMF not taking	0.4	NC
0.02	0	PreV	F328	MMF	0.4	NC
0.06	0	PreV	F354	MMF	0.4	NC
0	0	PreV	F457	MMF Not taking	0.4	NC
0.002	0	PreV	F661	MTX	0.4	NC
0	ND	PreV	F671	MTX	0.4	NC
0.358	1.08	PreV	R005	B Cell Depletion	0.4	NC
0.056	0	PreV	R014	B Cell Depletion	0.4	NC
0	0	PreV	R025	B Cell Depletion	0.4	NC
0.05	0	PreV	R029	Other	0.4	NC
0	0	PreV	R041	B Cell Depletion	0.4	NC
0	0.22	PreV	R049	B Cell Depletion	0.4	NC
0.105	0.13	Pre V	100710	HC		NC
0.019	0	Pre V	100700	HC		NC
0.26	0	Pre V	100648	HC		NC
0.218	0.046	Pre V	100668	HC		NC
0.092	0.02	Pre V	100675	HC		NC
1.72	0.35		Positive control
1.61	0.061		Positive control
0.89	0.091		Positive control
1.86	0.5		Positive control
1.17	0.42		Positive control
1.48	0.56		Positive control
1.32	0.37		Positive control
1.27	0.11		Positive control
1.75	0.33		Positive control
1.16	0.37		Positive control
2.81	0.63		Positive control
1.11	0.33		Positive control
1.82	0.13		Positive control
1.74	0.52		Positive control
0.77	0.1		Positive control
0.78	0.36		Positive control
1.41	0.098		Positive control
1.62	0.4		Positive control
2.01	0.63		Positive control
0.89	0.34		Positive control
1.24	0.3		Positive control
2.73	0.69		Positive control
2.13	0.47		Positive control
2.23	0.6		Positive control
2.12	0.48		Positive control
0.59	0.2		Positive control
1.32	0.21		Positive control
1.33	0.34		Positive control
0.86	0.27		Positive control
2.03	0.68		Positive control
2.06	0.66		Positive control
1.19	0.24		Positive control
1.82	0.36		Positive control
1.25	0.54		Positive control
1.13	0.19		Positive control
1.31	0.38		Positive control
1.28	0.29		Positive control
1.06	0.18		Positive control
1.03	0.072		Positive control
1.18	0.32		Positive control
1.04	0.3		Positive control
1.94	0.45		Positive control
1.62	0.52		Positive control
1.1	0.099		Positive control
1.47	0.21		Positive control
1.76	0.39		Positive control
1.16	0.31		Positive control
Failed either CD4 or CD8 QC
	CD4 count	CD8 count	Visit	CD4 % AIM	CD8 % AIM
F328	241	70	Post B1	0.001	0.001
ACE-MS-097/b	264	439	Post V1	1.67	0.29
ACE-MS-105/b	146	136	Post V1	0.53	0.001
ACE-MS-083/e	980	216	Post B1	0.001	1.39
ACE-MS-097/e	185	270	Post B1	0.001	0.29
ACE-MS-105/e	61	90	Post B1	0.001	0.09
ACE-MS-116/a	784	707	Pre V	0.001	0.001
575044	67	164	Post V1	1.38	0.001
100675	874	331	Post V1	0.443	1.122
E0254	400	163	Post V1	0.59	0.001
E3338	486	107	Post B1	1.52	0.001
E3577	434	112	Post B1	7.533	20.406
B051	904	218	Pre V	0.001	0.001
F355	473	309	Pre V	0.21	0.001
F437	209	54	Pre V	0.001	0.001
R021	166	32	Pre V	0.001	3.12
F485	84	76	Pre V	1.19	0.001
F310	451	288	Pre V	0.001	0.35
F682	613	747	Pre V	0.001	0.001
F534	968	249	Post V1	0.001	0.001
F636	359	159	Pre V	0.001	0.001
F696	2	378	Post B1	0.001	0.001
ACE-MS-088/b	165	925	Post V1	0.001	0.22
ACE-MS-088/e	800	4975	Post B1	0.37	0.019
ACE-MS-099/e	391	1803	Post B1	0.001	0.001
E1017	17	8199	Post V1	0.001	0.001
E3490	9	8178	Post V2	11.1	0.001
F104	635	1446	Pre V	0.001	0.001
F696	5	839	Post V1	33.33	0.001
F666	7693	713	Post V1	1.87	0.63
ACE-P-022b	23260	577	Post V1	0.001	0.17
ACE-P-022b	10054	300	Post V1	0.072	0.001
ACE-P-006b*	1541	503	Post B1	2.92	0.71
ACE-P-027b*	4270	478		0.06	0.03
ACE-MS-001/b	5397	569	Post V1	0.282	0.03
ACE-MS-043/b	6361	494	Post V1	0.29	2.02
ACE-MS-043/e	9601	705	Post B1	1.71	3.58
500902	5065	590	Post V1	1.74	0.55
500908	4971	631	Post V1	0.11	0.001
575065	21648	733	Post V1	6.84	2.39
100879	2066	463	Post V1	0.218	0.54
E2103	1658	713	Post V1	0.1	0.001
F671	1523	466	Pre V	0.001	0.001
R105	15636	414	Post V1	0.09	0.001
R121	11804	311	Post V1	0.502	0.32
R014	3373	368	Post V1	3.793	2.134
R067	1771	510	Post V1	0.04	0.03
R072	34477	674	Post B1	0.093	0.15
B051	2395	362	Post V1	0.17	0.28
F475	1065	158	Post V1	0.001	0.001
F503	1303	412	Post V1	12.85	4.15

## Sheet: Anti-NC and Spike Ig
Total 463	Pre V 282		Post V1 397		Post V2 249		Post V3 49		Pre B 59		Post B1 211
Study Subject ID Source	Anti-NC	Anti-Spike IgG	Anti-NC	Anti-Spike IgG	Anti-NC	Anti-Spike IgG	Anti-NC	Anti-Spike IgG	Anti-NC	Anti-Spike IgG	Anti-NC	Anti-Spike IgG
R023	0.06	0.57	0.06	266	0.08	161
R149	0.08	0.98	0.06	1.24	0.11	0.41					0.08	2308			Anti-NC+
R097	0.1	8800	0.07	5160			0.08	910							Anti-NC Acq
F474	0.14	4	0.08	3440							0.08	51440			Anti-NC-
ACE-MS-082	0.9	0.4	0.09	10.9					0.08	7.94	0.09	14.3
F451	0.09	19.7	0.09	117	0.1	443					0.11	84690
F666	0.1	8.74	0.1	158
ACE-MS-003	0.1	2.69	0.11	60
F510	0.46	5.42	0.11	13.5	0.09	1.09					0.18	324
R106	0.17	34.6	0.13	50710
F521	0.13	4.88	0.17	1900	0.13	409
R001	3.38	983	0.42	11964
R071	0.67	68.8	0.44	5910							0.23	14924
F498	0.53	0.4	0.56	3370	0.49	2030					0.43	57720
575296	0.57	0.4	0.58	0.4
F659	1.18	42.9	0.61	18600	0.48	6000
F470	1.14	0.43	0.63	1500	0.47	438	139	541
E3557	0.69	39.2	0.64	52100
ACE-P-010	0.88	0.8	0.73	102	0.77	168					0.86	7530
R092	5.08	6.98	0.8	1150	0.84	349
F437	2.15	45.7	0.83	10910	0.59	3680
B051	0.37	7930	0.91	9580	0.41	1140	0.18	530
R070	0.09	0.4	1.15	5400	0.2	1520
R060	0.08	0.4	1.25	68.9
R008	2	422	1.25	9280	1.06	448
F242	1.73	0.4	1.35	134	15.2	24770
500877	0.09	1.05	1.5	429							0.62	3309
F485	0.1	0.4	1.58	3790	4.59	1100	2.55	1020			3.16	5895
F707	4.78	195	1.77	12890	0.87	2081
F332	2.17	64.5	1.95	22500	3.16	9890	2	7130
F371	2.43	531	2.34	46900	2.03	26350	160	43500
B001	0.78	1.47	2.62	9.3	4.01	19.4
R053	283	901	2.89	37300	211	22465					148	20379
E2143	6.34	10.94	2.96	5.43
B027	4.96	153	2.97	16550			88.8	7261
R024	7	78.3	3.48	20453	77.4	14702
R080	0.1	0.4	4.91	10.3
F158	10.1	35.2	5.54	3360	2.46	996
F124	5.25	117	5.57	18400	3.84	2490					3.05	16599
R035	13.3	515	6.12	61270
500807	15.7	30.4	6.28	16811	3.53	2551
F530	9.94	97	6.47	43080	2.74	17220
F473	26	5.14	8.2	5930	16.5	2388
F442	19.1	542	10.6	32150	19.2	63530
R082	14.9	82.5	11.6	15450
F310	0.29	1.15	14.5	37460	15.3	10910					12.5	35600
500899	33.7	63.2	15.4	9972	6.27	3014
F503	8	6460	15.6	14520	11.5	8780					78.9	45500
500823	38.1	108	16.5	5208
F634	41	86	17.4	30450	1.35	13220					10	15173
E0216	17.3	2.38	18.4	19372
F104	36.4	4360	20.3	24710	25.1	11930	165	16166
B009	0.14	0.4	21.3	891
F684	25.2	96.7	22.3	3550	1.4	505	0.88	14632
500908	0.08	0.4	27.7	16503	9.67	2088
F670	68	1750	27.9	23920	33.5	7610
500884	55.8	11200	30.5	9558	10.4	5944
F455	0.1	0.4	32.1	29030							20.8	103000
F686	32.8	607	36.5	37620
500944	0.08	0.4	40.1	915							193	8555
R021	14.4	970	47.4	5980	36.1	4490					27.1	35400
ACE-MS-009	53.4	44.6	49.2	18369	41.9	7504
F090	74.9	161	52.8	17150	35.1	6290
500474	24.9	233	53	11731	32.4	3392
500936	0.08	0.4	73.9	2422	32.2	1127
ACE-MS-027	0.09	13361	95.1	12925
E3588	104	1717	99.2	109500
500861	141	198	99.9	12137	17.8	208
500898	102	5.03	111	1255	55.8	1018
F139	181	404	115	89920	79.3	54760					258	147200
500771	183	2086	125	151600
533079	235	382	143	48100	27.2	25000
F303	0.11	0.4	144	5940
ACE-MS-134	224	333	166	51600							36	24808
F159	192	199	177	20786
F509	60.2	231	218	51420	31.1	28090
ACE-MS-116	220	13.5	313	2070							105	1546
E3549	8.41	0.4			3.93	1484
R146	31.8	4.18			2.19	469
F667	0.09	7.59			0.09	36.8					0.2	104200
ACE-MS-087	0.13	8.1			0.13	7.32
ACE-MS-056	39.4	13.5			14.8	2926					159	25000
F687	16.2	69.3			10.6	7290
F676	9.28	524			5.86	14460
R044	8.33	641			4.49	13670
F683	208	795			4.12	6690
R088	49	4440			7.53	5560					4.98	71300
ACE-MS-062			0.78	0.4	0.41	5.38
R113			0.8	22550							0.39	1095
F535			1.05	3590
E1974			3.23	221	0.26	13.3
E0362			3.76	25000
F613			5.4	369							1.14	77530
F728			5.57	14180
F688			6.16	116830
R102			8.08	219
ACE-MS-045			17.3	3679							7.72	3924
F085			18.7	2450	17.1	1330
F165			50.2	6010
F654			72.3	6120	46.5	5180	56.6	2622
F475			96.3	11440	33.3	2390
ACE-MS-026			115	438	0.1	964					0.07	622
F701			129	13810	49	2050
F155			142	83140	19	50620	15.5	21320			144	129300
B066			143	35910
F260			161	2340
ACE-P-013			184	3011	62.3	1387
B062			204	92510
F705			220	10580	197	4750
B028			235	84360
E2993			248	25000	163	3714
F690			453	23830	10.4	189
F677	0.09	0.4	0.07	1410			7.25	96500
R034	0.09	0.4	0.07	652			18.1	65600
ACE-P-003	0.18	0.8	0.07	2.99	0.08	39.7	0.99	9702
F665	0.09	0.4	0.08	824			16.8	65500
R108	0.1	0.4	0.11	1030			5.62	19167
F281	0.15	1.83	0.13	11130	0.15	4150	193	4372
E1906			0.07	1309	0.08	241	162	>25000
B013			0.08	14500	0.07	5220	4.85	17996
F648			0.08	2410	0.08	301	0.88	14632
ACE-MS-106									0.06	1830	16.2	411700
ACE-MS-124									0.07	0.4	0.08	0.4
ACE-P-034									0.07	188	0.09	21624
F329									0.07	0.4	0.09	0.4
F647									0.07	832	0.07	820
F737									0.07	2048	0.08	82800
R014	0.1	0.4	0.06	0.4	54.1	1000
F719	0.08	0.4	0.07	839	1.37	98900	1.38	38100
R036	0.07	0.4	0.09	225	0.08	139					2.1	45400
R063	0.1	0.4	0.1	208	0.1	696					13.9	74900
R029	0.15	0.4	0.13	0.4	0.67	30.4					0.8	246
F671	0.19	0.4	0.16	3370	0.17	3400	0.14	4070			57	317000
R119	0.15	0.4	0.16	553							187	4488
R019	0.21	0.4	0.27	188	1.49	67.7					3.62	12000
R077	0.1	0.4	0.33	3680	9.88	1370
R094	0.1	0.4			0.08	291	0.07	522			45.4	20936
R022	0.1	0.4			0.09	55.3					8.65	212600
F691			0.07	2490	0.06	1120					0.86	63200
F712			0.07	445	0.9	272
E3359			0.08	2205	43.8	399600
E0254			0.09	158	4.7	2622
E1811			0.11	553					15.6	25000	14.4	25000
R067	0.08	0.4	0.07	24.3			0.07	2655			1.78	2110
F370	0.09	0.4	0.08	2350	0.08	744					9.97	347900
R059	0.09	0.4	0.06	47.3	0.08	74.4	0.07	6428
R107	0.08	0.4	0.06	0.4	0.08	97	0.11	10560
F354	0.1	0.4	0.06	25.4							0.08	33050
R086	0.09	0.4	0.06	0.4	0.08	0.4					0.09	0.49
F150	0.09	0.4	0.06	1700	0.09	962					0.07	108300
F298	0.09	0.4	0.06	567	0.09	241
R010	0.09	0.4	0.06	872
F097	0.1	0.4	0.07	30.7	0.07	31.6	0.08	34.8			0.08	3934
R054	0.09	0.4	0.07	2.46	0.09	0.88	0.07	4570
ACE-MS-072	0.09	0.4	0.07	0.78	0.08	0.43			0.09	0.4	0.08	2.33
ACE-MS-083	0.07	0.4	0.07	0.4	0.08	0.4			0.08	0.4	0.08	76.5
F120	0.09	0.4	0.07	3.25	0.08	4.2
F135	0.08	0.4	0.07	124
F292	0.08	0.4	0.07	158	0.35	68300
F328	0.09	0.4	0.07	321							0.33	179800
F440	0.1	0.4	0.07	72.6	0.09	5.51					0.07	11900
F692	0.1	0.4	0.07	96.4							0.21	19018
R005	0.1	0.4	0.07	0.4	0.07	0.4					0.08	0.4
R017	0.1	0.4	0.07	379	0.09	226
R027	0.1	0.4	0.07	182	0.08	622					0.07	222590
R033	0.1	0.4	0.07	91.4	0.08	183					0.07	2040
R037	0.09	0.4	0.07	0.4
R038	0.09	0.4	0.07	319	0.08	135
R043	0.09	0.4	0.07	0.4
R064	0.08	0.4	0.07	0.4							0.09	6.46
R072	0.1	0.4	0.07	7.93	0.06	2.51					0.08	115
R075	0.09	0.4	0.07	259
R101	0.09	0.4	0.07	101
R117	0.09	0.4	0.07	0.96							0.07	29740
F012	0.1	0.4	0.07	752	0.07	695	0.08	660			0.09	115600
F071	0.1	0.4	0.07	703	0.09	375	0.08	487
F578	0.1	0.4	0.07	2140			0.08	1384
575653	0.08	0.4	0.07	592	0.08	561
ACE-P-016	0.08	0.4	0.07	850
E3490	0.08	0.4	0.07	4064	0.4	1945
F092	0.1	0.4	0.07	2650	0.07	1650
F682	0.09	0.4	0.07	3160
F685	0.09	0.4	0.07	4650	0.07	924
F693	0.1	0.4	0.07	1180	0.07	223
R025	0.1	0.4	0.07	1210							0.07	188120
R032	0.1	0.4	0.07	862
R041	0.09	0.4	0.07	1730
R089	0.1	0.4	0.07	647
R100	0.09	0.4	0.07	606	0.09	120
ACE-P-014	0.16	0.8	0.07	0.4	0.08	0.4					0.07	31.9
ACE-P-002	0.18	0.8	0.07	2265	0.07	601					0.08	83200
ACE-P-018	0.16	0.8	0.07	2311	0.08	1431					0.09	20269
F372	0.09	0.4	0.08	7.28			0.06	123
R065	0.09	0.4	0.08	347			0.07	47500
R093	0.1	0.4	0.08	0.4	0.09	6.93	0.09	0.4
500022	0.09	0.4	0.08	377							0.08	7098
500041	0.09	0.4	0.08	369	0.09	425					0.09	16089
500497	0.08	0.4	0.08	47.8	0.08	19.8
500937	0.09	0.4	0.08	73.3	0.08	70.3
500940	0.08	0.4	0.08	135	0.08	12.7					0.08	1844
575044	0.08	0.4	0.08	10.1							0.08	245
575065	0.09	0.4	0.08	21.5
575747	0.08	0.4	0.08	6.86
ACE-MS-005	0.08	0.4	0.08	0.4
ACE-MS-007	0.09	0.4	0.08	0.4							0.09	0.4
ACE-MS-032	0.09	0.4	0.08	27.3							0.08	13658
ACE-MS-061	0.07	0.4	0.08	0.4	0.09	0.4
ACE-MS-065	0.08	0.4	0.08	5.53
ACE-MS-066	0.09	0.4	0.08	0.4	0.09	0.4			0.08	0.4	0.08	0.4
ACE-MS-067	0.08	0.4	0.08	0.4							0.09	18.3
ACE-MS-070	0.08	0.4	0.08	0.4
ACE-MS-077	0.07	0.4	0.08	6.44	0.08	5.49			0.09	4.11	0.08	357
ACE-MS-080	0.08	0.4	0.08	0.4	0.08	0.4			0.07	0.4	0.07	0.4
ACE-MS-084	0.09	0.4	0.08	0.4					0.09	0.4	0.07	242
ACE-MS-086	0.08	0.4	0.08	340	0.09	336
ACE-MS-095	0.07	0.4	0.08	0.78	0.08	0.4			0.07	0.4	0.08	198
ACE-MS-132	0.08	0.4	0.08	180					0.08	47.1	0.07	12477
B024	0.11	0.4	0.08	127
E1598	0.08	0.4	0.08	235
F001	0.1	0.4	0.08	11.3							0.08	2699
F004	0.09	0.4	0.08	55.7	0.09	21.1
F311	0.09	0.4	0.08	0.47
F323	0.1	0.4	0.08	278							0.09	142200
F355	0.09	0.4	0.08	185							0.08	24850
F541	0.09	0.4	0.08	313
F672	0.09	0.4	0.08	37.4							0.07	93.8
R042	0.09	0.4	0.08	0.4	0.09	0.4					0.09	3.17
R049	0.09	0.4	0.08	57.5
F504	0.09	0.4	0.08	4350	0.08	2070	0.08	1630			0.09	300600
500026	0.08	0.4	0.08	913	0.07	512
500054	0.08	0.4	0.08	914	0.09	1204
500900	0.09	0.4	0.08	1543
500902	0.08	0.4	0.08	1156
500915	0.08	0.4	0.08	1045	0.09	129
575188	0.08	0.4	0.08	986	0.08	393
575277	0.08	0.4	0.08	6221	0.08	3625
575572	0.07	0.4	0.08	1625	0.08	1576
ACE-MS-115	0.09	0.4	0.08	4946	0.09	727
ACE-MS-127	0.1	0.4	0.08	1577	0.08	747					0.08	15840
ACE-MS-130	0.09	0.4	0.08	13729	0.09	1889					0.07	255500
ACE-MS-133	0.08	0.4	0.08	2339					0.07	2281	0.08	1478
F134	0.1	0.4	0.08	8330	0.09	8730
R012	0.09	0.4	0.08	3900	0.09	1360					0.07	45930
R046	0.09	0.4	0.08	568	0.09	872					0.09	38000
R079	0.11	0.4	0.08	916	0.07	659
ACE-P-004	0.18	0.8	0.08	0.4	0.08	0.4					0.08	0.4
ACE-P-021	0.16	0.8	0.08	0.4							0.08	72
ACE-P-026	0.18	0.8	0.08	8416	0.09	4613					0.07	53400
ACE-MS-006	0.08	0.4	0.09	25.6	0.09	152	0.08	30
500909	0.09	0.4	0.09	494	0.09	390
575633	0.09	0.4	0.09	499	0.12	240
598710	0.08	0.4	0.09	354							0.09	12114
ACE-MS-004	0.09	0.4	0.09	10.3					0.08	1.94	0.09	108
ACE-MS-031	0.09	0.4	0.09	0.4	0.07	0.4
ACE-MS-058	0.09	0.4	0.09	50.7					0.09	35.6	0.1	2840
ACE-MS-079	0.09	0.4	0.09	0.4	0.08	0.4			0.08	0.4	0.08	0.4
ACE-MS-088	0.08	0.4	0.09	27.8					0.09	5.24	0.08	27.2
ACE-MS-090	0.09	0.4	0.09	3.13	0.08	4.85					0.08	7.54
ACE-MS-097	0.09	0.4	0.09	1.63					0.09	2.45	0.08	30.4
ACE-MS-099	0.09	0.4	0.09	179							0.09	697
ACE-MS-105	0.1	0.4	0.09	0.55							0.11	29.5
E0428	0.18	0.4	0.09	42.7	0.2	48.2
E1142	0.08	0.4	0.09	22.8							0.09	1432
F656	0.1	0.4	0.09	236
F660	0.09	0.4	0.09	302	0.08	351					0.09	14450
F661	0.09	0.4	0.09	83.9	0.09	247					0.07	50320
F727	0.07	0.4	0.09	1.57
R006	0.1	0.4	0.09	174
R091	0.13	0.4	0.09	0.45	0.34	32.6
F248	0.09	0.4	0.09	2230	0.08	671	0.09	345			0.09	95800
F636	0.07	0.4	0.09	1570			0.08	778
500905	0.08	0.4	0.09	1323	0.1	1062
575759	0.08	0.4	0.09	1794
ACE-MS-092	0.1	0.4	0.09	1524	0.08	684					0.09	1307
ACE-MS-098	0.1	0.4	0.09	17959							0.08	173000
ACE-MS-117	0.09	0.4	0.09	17587	0.09	8277					0.07	92.5
B002	0.09	0.4	0.09	12700	0.08	2420					0.07	86400
F072	0.1	0.4	0.09	522							0.07	9280
F457	0.09	0.4	0.09	913							0.09	87680
F649	0.12	0.4	0.09	5300
R007	0.09	0.4	0.09	1310
R087	0.11	0.4	0.09	2420
ACE-P-025	0.18	0.8	0.09	114							0.09	16159
ACE-P-020	0.16	0.8	0.09	7636
500499	0.09	0.4	0.1	80.3	0.09	110
500935	0.09	0.4	0.1	369	0.08	228
ACE-MS-001	0.09	0.4	0.1	0.4							0.09	0.4
ACE-MS-002	0.09	0.4	0.1	0.4
ACE-MS-063	0.09	0.4	0.1	0.4
ACE-P-001	0.11	0.4	0.1	28.2							0.12	8982
F294	0.06	0.4	0.1	0.4							0.07	0.4
F450	0.1	0.4	0.1	279	0.13	925
R069	0.1	0.4	0.1	9.11
R076	0.1	0.4	0.1	68.4
ACE-P-036	0.08	0.8	0.1	2814
F327	0.16	0.4	0.13	584
500945	0.1	0.4	0.14	2347	0.39	991
R011	0.1	0.4	0.15	25	0.11	15.6					0.13	9310
R026	0.11	0.4	0.15	211	0.09	44.5
R040	0.15	0.4	0.15	208	0.14	137					0.16	2674
ACE-P-008	0.24	0.8	0.15	6712	0.12	3713					0.14	102100
E3329	0.08	0.4	0.16	380	0.09	136
533305	0.15	0.4	0.17	925	0.39	991
E2103	0.09	0.8	0.18	0.88	0.09	16.8
E1748	0.09	0.4	0.2	1346	0.1	2336
E1156	0.08	0.4	0.4	457.5
ACE-MS-071	0.08	0.4			0.07	0.4					0.09	0.4
ACE-MS-109	0.08	0.4									0.08	1.75
ACE-P-035	0.0732	0.4
F703	0.1	0.4									0.07	8408
R004	0.1	0.4									0.1	116500
R018	0.2	0.4			0.19	215					0.19	33500
R020	0.09	0.4									0.09	7460
R031	0.09	0.4			0.09	0.4					0.09	0.45
R048	0.08	0.4			0.09	20.2					0.07	13010
R050	0.09	0.4			0.09	7.89
R051	0.08	0.4			0.07	26.8
R057	0.09	0.4			0.12	67080
R081	0.11	0.4			0.08	3200
R084	0.07	0.4			0.06	11.5					0.07	9981
R132	0.08	0.4			0.37	222
R133			0.06	46.8	0.3	39880	0.24	13738
E3455			0.06	1465	0.09	1179
F534			0.06	1040	0.08	503
F714			0.06	10160
R147			0.06	1110
R130			0.07	130	0.08	90.3	0.08	58.8			0.08	5880
ACE-P-027			0.07	0.48	0.09	0.62
B067			0.07	2.53	0.09	30.4
E1602			0.07	238					0.09	72.1	0.08	10317
F696			0.07	75.9	0.09	53.4					0.07	11810
R127			0.07	208
R129			0.07	0.4	0.07	0.4					0.09	25
B060			0.07	9040			0.08	6449			0.09	193400
B063			0.07	11320	0.08	3690	0.18	2652
ACE-P-009			0.07	5051	0.08	3090					0.08	48400
ACE-P-017			0.07	2247	0.09	1527
ACE-P-022			0.07	1009
ACE-P-024			0.07	8456							0.08	165000
B021			0.07	7430	0.08	3880					0.08	218100
E2150			0.07	1519	0.08	319
E3515			0.07	1164	0.08	277
E3596			0.07	1099							0.07	42600
F213			0.07	942	0.07	694
F217			0.07	3900	0.07	8430
F452			0.07	1250							0.06	29100
F716			0.07	1460	0.06	180
R128			0.07	4480	0.07	4120
R131			0.07	1870	0.06	1070					0.07	21370
F720			0.0794	57
F717			0.08	217			0.08	119
ACE-MS-012			0.08	0.4					0.08	0.4	0.07	0.4
ACE-MS-068			0.08	161
E0407			0.08	7.33	0.1	16.6
E1017			0.08	92.3	0.09	468
E2664			0.08	0.58	0.07	0.4
E3163			0.08	395	0.16	176.4
E3311			0.08	242	0.09	556					0.07	7038
E3331			0.08	394	0.08	236
E3338			0.08	482	0.08	56.1					0.09	17983
E3345			0.08	319	0.07	63.5					0.09	14872
E3540			0.08	0.4	0.07	0.4
E3630			0.08	182
F694			0.08	0.4							0.07	13420
R144			0.08	199
R145			0.08	20.9
F319			0.08	7780	0.07	13680	0.07	123200
R121			0.08	1010	0.08	779	0.07	425
ACE-MS-024			0.08	1031					0.08	219	0.07	11789
ACE-MS-025			0.08	7398							0.08	226
ACE-MS-049			0.08	700							0.08	7919
ACE-MS-060			0.08	1382							0.07	136800
ACE-P-005			0.08	1007	0.08	397					0.08	9899
ACE-P-006			0.08	5079	0.08	2061					0.08	760
ACE-P-011			0.08	12289	0.08	3034					0.09	48800
ACE-P-012			0.08	553	0.08	111					0.08	114500
ACE-P-015			0.08	2049	0.07	591					0.09	5521
ACE-P-019			0.08	3479	0.08	236
B064			0.08	857
E3352			0.08	1088					0.08	1622	0.08	16434
E3410			0.08	1830	0.09	1536
E3436			0.08	1904	0.09	1816					0.07	71600
F326			0.08	9530							0.09	55700
R118			0.08	792	0.07	595
R126			0.08	3630	0.07	1660					0.09	7051
F514			0.09	343			0.37	108500
ACE-MS-014			0.09	38.8							0.07	23033
ACE-MS-043			0.09	0.4							0.08	0.4
E3484			0.09	0.4	0.09	0.4
E3575			0.09	177	0.08	138
F655			0.09	28.5
F702			0.09	65.7	0.07	14.3					0.09	1680
R103			0.09	175	0.08	47					0.08	7860
R104			0.09	261	0.08	209					0.07	9780
R105			0.09	332	0.09	421
R112			0.09	1.19
R115			0.09	18	0.07	637
R122			0.09	16.7	0.07	157					0.09	21881
ACE-P-023			0.09	1581			0.08	1357
B055			0.09	9450	0.08	1646	0.08	1614
R111			0.09	753			0.07	472			0.07	46710
ACE-P-007			0.09	2267
F232			0.09	2090							0.08	16460
F314			0.09	7170
F704			0.09	4740	0.09	5130
R096			0.09	632
R125			0.09	2040	0.07	1630
R136			0.09	940
R148			0.09	769
E3568			0.1	417	0.09	10105
F460			0.1	26.3							0.12	18930
F713			0.1	285							0.09	6210
R095			0.1	277	0.07	16.3					0.07	3040
R110			0.1	361							0.07	19420
E3473			0.1	917	0.09	1182
F620			0.1	1730	0.07	730					0.07	14820
F695			0.1	5760	0.09	4220					0.06	63970
F726			0.1	4020	0.11	1100
B061			0.11	181
ACE-MS-036			0.12	4347							0.12	77500
E3523			0.12	2243	0.1	2604
R134			0.13	0.4							0.4	21130
R123			0.13	785
E3350			0.16	364	0.08	986
E3702			0.18	0.8	0.09	0.4
E0755			0.18	15568	0.16	4270
R124			0.19	133	0.4	323					0.11	19550
E3001			0.21	3873					0.19	1216	0.21	25000
E3577			0.22	5.24	0.16	2.81					0.16	5103
R090			0.34	328							0.19	7810
575228									0.0729	9.59	0.1	3374
ACE-MS-085									0.0759	378	0.08	230
ACE-MS-091									0.08	162	0.65	94900
ACE-MS-093									0.08	9.24	0.08	866
ACE-MS-094									0.08	309	0.08	49300
ACE-MS-096									0.08	0.87	0.08	2226
ACE-MS-100									0.08	14.2	0.09	8.69
ACE-MS-102									0.08	0.4	0.09	0.4
ACE-MS-108									0.08	0.4	0.08	0.4
ACE-MS-118									0.08	1547	0.09	16561
ACE-MS-119									0.08	0.4	0.09	0.4
ACE-MS-120									0.09	367	0.09	5213
ACE-MS-121									0.09	0.4	0.08	807
ACE-MS-122									0.09	2.2	0.09	8.52
ACE-MS-125									0.09	3.21	0.09	36.1
ACE-MS-126									0.09	26.4	0.08	645
ACE-MS-128									0.09	1942	0.07	618
ACE-MS-131									0.09	198	0.08	9210
ACE-P-028									0.09	3.26	0.09	26.2
ACE-P-029									0.09	0.4	0.1	0.4
ACE-P-030									0.09	96.4	0.1	46900
ACE-P-031									0.09	3712	0.08	6230
ACE-P-032									0.09	325	0.09	65580
ACE-P-033									0.09	0.4	0.07	0.4
ACE-P-037									0.13	1832	0.14	22088
ACE-P-038									0.14	13.7	0.15	1372
E2620					0.09	23.8			0.19	0.4	0.19	1.06
E3385					0.08	2262			0.38	4730	0.37	11896
E3646									1.14	333	0.67	2144
E3705									2.3	56.9	2.33	445
E3708									11.5	6190	22	56740
R151									75.6	10072	68.2	17034
R152											0.09	2034

## Sheet: Autoantibodies
														Raw values
Subject ID	Redcap visit	Anti-NC	Anti-spike	Anti-Human IgG (H+L)	Anti-Human IgG F(ab') fragment specific	Anti-Human IgG Fc fragment Specific	Bare Bead	Human IgG from serum	Adj 1	Adj 2	Adj 3	Adj 4	Correction factor	IA2	PDC-E2	TG	TPO	IFN-alpha1	IFN-alpha10	IFN-alpha2	IFN-alpha6	IFN-alpha7	IFN-alpha8	IFN-epsilon	IFN-gamma	IFN-lambda1	IFN-lambda2	IFN-omega	IL-10	IL-11	IL-12	IL-13	IL-15	IL-17A	IL-17F	IL-1A	IL-1RA	IL-2	IL-21	IL-22	IL-23	IL-31	IL-34	IL-4	IL-6	IL-7	IL33	EJ	MDA5
500022	Pre V	0.09	0.4	34640	52557	26762	0	19894	1.07972	1.02228	1.02713	0.996444	1.03139	207	1147.5	0	0	3060.5	228.5	2634	2267	2927	748	189	1041	416	192.5	0	969	185	0	1831	1212	641	0	0	510	8672.5	1618.5	1571.5	0	1473.5	1411	305	64	353	1880	270.5	173.5
500022	Post V1	0.08	377	30817	50617	24810.5	0	16920	0.960562	0.984541	0.952236	0.847483	0.936206	261	1417	0	0	3148	657	2696	2739	3994	1085.5	774	1217.5	1234	1092	0	1672.5	1024	0	3075	1587	897	0	0	664	8005	3150	1885	0	1637	1397.5	918	288	580	1895	379.5	620
500022	Post B1	0.08	7098	43311	65362	34915.5	0	27117	1.35	1.27134	1.34007	1.35823	1.32991	177.5	1022	0	0	2850	497	2280	2417.5	3029.5	980.5	375	934	756	404	0	1374	478.5	0	1839	1173	794	0	0	542	5711.5	1729.5	1563	0	1222.5	1662	544	111	417.5	1778	233.5	288.5
500026	Pre V	0.08	0.4	25772.5	44584.5	20075.5	0	13308	0.803326	0.867204	0.770505	0.666566	0.7769	140.5	6545	0	0	2469.5	245.5	1767	2219.5	1957.5	729.5	207.5	323	209.5	157	0	705.5	142.5	0	1256.5	1076.5	349.5	0	0	94.5	190.5	1356.5	1207	0	1005.5	691.5	88.5	132	257	1361.5	222	0
500026	Post V1	0.08	913	37210	59997	30239.5	0	22280	1.15983	1.16699	1.1606	1.11595	1.15084	280	931	0	0	6616	441	4266.5	3446.5	2574	1320	41	976	413	330	0	1455	325.5	0	3526.5	2676	919	0	0	184	328	742.5	3323	0	2881	1061	316.5	351.5	212	3896	693	0
500041	Pre V	0.09	0.4	31146	48695	25771	0	17364	0.970817	0.947157	0.9891	0.869722	0.944199	12.5	1389.5	2811	11240	325	84	416.5	2340.5	2668	133	647	1046.5	429	126	0	245	382	0	522.5	87	444	191	0	0	56	601	268.5	0	269.5	1629	172	33.5	429.5	198.5	0	298
500041	Post V1	0.08	369	31326	49059	25411	0	17635.5	0.976428	0.954237	0.975283	0.883321	0.947317	39	1852	2688	9948.5	363	73.5	268	2463	2356	176.5	534	905	357	102	0	241.5	395	0	477	95.5	454	203	0	12	87.5	578	265	0	265	2201.5	230	56	427.5	235	13	294.5
500041	Post B1	0.09	16089	13643.5	25509	11584.5	0	6605.5	0.425266	0.496171	0.444617	0.330854	0.424227	35	641.5	1971.5	5831	71.5	30	105.5	969	1689.5	64	285.5	267.5	99	36	0	84	139.5	0	163	39	144	81	0	12	33.5	226	75.5	0	86.5	706	31	0	149.5	65	12	93.5
500054	Pre V	0.08	0.4	24870	42580	20299	0	12850.5	0.775195	0.828215	0.779083	0.643651	0.756536	164.5	0	0	0	1190	266	828	2160	2669.5	528	376.5	350.5	3279	141.5	0	528.5	6958.5	0	634	434	346	663.5	516	116.5	122	735	667	0	533.5	1187	53.5	137	1684	687.5	80	92
500054	Post V1	0.08	914	34039	57514	27653	0	20394	1.06099	1.11869	1.06133	1.02149	1.06563	87	0	0	0	2162	206	1504	2636	3021	500	162	469.5	4953.5	90	0	781	9170	0	856.5	882.5	363	894	696.5	130	136.5	73.5	1017.5	0	907	1416	159	158.5	2776.5	1409	165	46
500474	Pre V	24.9	233	38207	62900	31018	0	21485	1.19091	1.22346	1.19048	1.07613	1.17024	196	0	11524	89614	3639	132	2348	8556.5	4663	914	0	504.5	13.5	57	0	716	0	0	1037	1458	816	0	0	0	0	223.5	1585.5	0	1261	859.5	0	0	299.5	2347	12	0
500474	Post V1	53	11731	35340	56036	28242	0	15448	1.10154	1.08995	1.08394	0.773754	1.0123	161	0	11521	84105	4033	80.5	2708.5	6896	4192	1011.5	76	307.5	74.5	0	0	776	0	0	1242.5	1736	852.5	216	0	53	0	221	1891.5	0	1452.5	793	0	80.5	198.5	2690	139	58
500497	Pre V	0.08	0.4	35946	52759.5	27802.5	0	21164.5	1.12043	1.02621	1.06707	1.06008	1.06845	133	0	0	606.5	1837.5	403.5	1715.5	1090.5	2057.5	632.5	99	555	247.5	219.5	0	772.5	390.5	0	1232	638.5	498.5	0	0	0	270.5	317.5	926.5	0	957.5	1735.5	206	129	126.5	1263.5	0	318.5
500497	Post V1	0.08	47.8	37915	54074.5	29991	0	23180.5	1.18181	1.05179	1.15107	1.16106	1.13643	64.5	0	0	511.5	1703.5	315.5	1570.5	1061.5	1889.5	764.5	237.5	624	200.5	232	0	763.5	489.5	0	1405	568	470.5	0	0	0	320	288.5	1103.5	0	1102	1840.5	232.5	208.5	260.5	1177.5	88.5	346.5
500499	Pre V	0.09	0.4	46085.5	71135	37541	0	30604	1.43648	1.38363	1.44084	1.53288	1.44846	73.5	0	0	0	2433	593	2013	2144.5	2239	1618	401	3673	551	725	0	1097	645	0	2300.5	1000	849	91	0	221	544	0	1489	0	1496	4301	684.5	247	301	1818	209	365
500499	Post V1	0.1	80.3	44666	71851.5	37844	0	29517.5	1.39223	1.39757	1.45247	1.47846	1.43018	115.5	0	0	0	2784.5	722.5	2599.5	2247.5	3082.5	1889.5	491.5	3760.5	562	891.5	0	1520	809.5	0	2444.5	1207	1011.5	178.5	107.5	297	602.5	391	1666.5	0	1680.5	4543.5	806	399.5	332	1965.5	169.5	221
500771	Pre V	183	2086	22997.5	27982.5	19495	0	13603	0.716829	0.544282	0.748225	0.681342	0.67267	538	0	0	0	5326	2228.5	4495	5861	4350	3885	2194	1435	1251	1382	0	2509	1983.5	0	4230.5	2527	1746	841	0	558	931	1296	3233	0	2760	717	1045	613	14	3669.5	737.5	265
500771	Post V1	125	>25000	30953	34306	26198	0	18411	0.964801	0.667279	1.00549	0.922164	0.889933	605	0	0	0	6854	5308	7055.5	8597	6716	5775	2791.5	1771	1515	1751	0	3070	3482	0	6640	3434.5	1861.5	1032	0	535	1413	2213	4941	0	4403.5	993	1472	607	307	4912	1003	351
500807	Pre V	15.7	30.4	40044.5	53838	33234	0	24345	1.24818	1.04719	1.27553	1.21938	1.19757	5.5	0	27	0	32	84.5	48	407	933	103	95.5	346	456	90.5	0	78.5	879.5	0	150	24	148	113	197	5	141.5	127.5	26.5	0	57	1821	38	200.5	148	21.5	96	115
500807	Post V1	6.28	16811	40674	52045	34840	0	24894	1.2678	1.01232	1.33717	1.24688	1.21604	1	0	0	0	132	155	143	626.5	846	109.5	151	474	676	70.5	0	125.5	956.5	0	230.5	42	206	133.5	190	17	140	177	112.5	0	105.5	1918	79.5	227	186	74.5	112	68.5
500823	Pre V	38.1	108	35291	59249	27711	0	26792	1.10002	1.15244	1.06356	1.34195	1.16449	70	0	0	0	857.5	239	845	2104	1655.5	337.5	744	1470.5	348	312	0	537	8602	0	1288	416	540	655	54	141	511	4503	714	20	722	6446.5	382.5	259	239.5	650	159	358
500823	Post V1	16.5	5208	25765.5	44485.5	19425.5	0	20643.5	0.803108	0.865279	0.745557	1.03398	0.861982	28	0	74	0	589	66.5	618.5	1565.5	1731.5	270.5	658	904.5	247.5	181.5	0	221	4385.5	0	421.5	246	437	526.5	34.5	96	406	2280.5	416.5	0	371.5	2736	60	71.5	144.5	401.5	70	119
500861	Pre V	141	198	29247	35850.5	24733	0	15672	0.911626	0.697321	0.949261	0.784974	0.835795	55	0	0	0	1746	610.5	1527	6701	7493.5	1102	13709.5	209	1412	485	0	859.5	419.5	0	986	649	528	190	0	140	774.5	477	965	140.5	604.5	845	433	873	574	973	100	135
500861	Post V1	99.9	12137	26631.5	36990.5	23943.5	0	16163.5	0.830101	0.719495	0.91896	0.809592	0.819537	18.5	0	0	0	632	377	756	4549	4494.5	579	11647.5	107	685.5	270.5	0	412.5	279	0	479.5	236.5	327	145.5	0	100.5	409	1473.5	415	73.5	309.5	613.5	221.5	427.5	281.5	367.5	68.5	93.5
500877	Pre V	0.09	1.05	31303	53997	25353	0	17291	0.975711	1.05029	0.973057	0.866066	0.96628	38.5	0	0	0	7640.5	158	6896	4014	4602	858	0	1911	2400	315	0	2691	602	0	7446	3539	1348	0	0	31.5	706.5	2516.5	4527.5	0	5252	395.5	1801.5	317	777	6068	283.5	0
500877	Post V1	1.5	429	31767.5	56357	25991	0	18766.5	0.990189	1.09619	0.997544	0.93997	1.00597	0	0	0	0	6441	0	6088	4960	3653	786	0	1292	2784	0	0	2926	111	0	7712	3928	1461	0	0	0	904	1818	4144	0	5961	0	1134	0	738	5577	118	0
500877	Post B1	0.62	3309	23810	29265	22971	0	14817	0.742155	0.569228	0.881635	0.742149	0.733792	0	0	0	0	5890	0	4421.5	1260.5	2045.5	506	0	1558	2041.5	405.5	0	1982	0	0	3960.5	2459	868	0	0	317.5	664	3479	2910	0	4550	350	947	0	163	4059.5	277.5	0
500884	Pre V	55.8	>25000	37223	58562	28138.5	0	20823	1.16024	1.13908	1.07997	1.04298	1.10556	1191.5	0	0	78213.5	2592	350	1908.5	2372.5	2423	984	285	726	464	208	0	916	1944.5	0	2107	1175.5	1132.5	0	357	136	1073	0	1623	0	1443	1524	316.5	115	425.5	1940	207	276
500884	Post V1	30.5	9558	35926	54531	27657	0	20478.5	1.11981	1.06067	1.06149	1.02572	1.06692	1104	0	0	77318	4178	503	2656	2406	2793	1492	315	870	410	407	0	1562	972	0	3159	2229	1344	0	431	226	1438	0	2580	0	2359	1639	604	422	462.5	2723.5	634	154
500898	Pre V	102	5.03	23693	38578	18502	0	14781	0.738508	0.750373	0.710113	0.740346	0.734835	652	0	357	51579	5964	487.5	7196	6512.5	4702	1459	365	1909	1970	1178.5	0	2656	1360.5	0	7404.5	4145	2344.5	0	0	787	1443	846	4482	0	5547	86	1460	436.5	589	5725	1722	20
500898	Post V1	111	1255	25273.5	42110.5	21046.5	0	14443	0.787772	0.819083	0.807772	0.723416	0.784511	0	0	538	52791.5	6813.5	0	6847	8375.5	5196.5	865	6.5	1729.5	2011.5	1152.5	0	2456.5	720.5	0	7538.5	3643.5	1198.5	0	0	0	1072.5	992.5	4483.5	0	4983.5	0	1701.5	153.5	0	5345.5	775	388.5
500899	Pre V	33.7	63.2	46442	73168	38104	0	28169.5	1.44759	1.42318	1.46244	1.41094	1.43604	118.5	0	10989	83091	1106	106.5	857	1602.5	1214	442	199	67.5	23	47.5	0	398	192	0	635	599	488	369	0	32	194.5	17937	606	0	627	1787	65	21	274.5	750	0	161.5
500899	Post V1	15.4	9972	43175.5	68614.5	33941.5	0	23387	1.34578	1.33461	1.30269	1.1714	1.28862	247.5	0	10952.5	71152.5	1341.5	169.5	1012.5	1968.5	2035.5	472	278.5	204.5	64.5	145.5	0	508	232.5	0	771.5	763.5	555.5	276.5	71.5	155.5	306.5	17104.5	689.5	0	669	1189.5	158.5	186.5	344	894.5	38.5	142.5
500900	Pre V	0.09	0.4	30991.5	53996	24204	0	18255	0.966001	1.05027	0.928958	0.91435	0.964894	0	0	0	0	8544	374.5	7012	6041	4357	1443	47	3485.5	1678	700.5	0	2914	721	0	6359	3866.5	1519	0	0	286	875	0	4973	0	6127	648	1019	742	0	5540	1098	334
500900	Post V1	0.08	1543	33846	56264	26449	0	19156.5	1.05498	1.09438	1.01512	0.959504	1.031	57	0	0	0	8182	259.5	7161	5959	4584.5	1467	586	3240	1175	1034	0	2975	838	0	6414	3571	1912	0	0	0	652	0	5336	0	5790.5	540.5	1145	543.5	0	6115.5	819	0
500902	Pre V	0.08	0.4	29105	35479.5	23477	0	17057.5	0.907199	0.690105	0.901055	0.85437	0.838182	0	0	1328	32987	4006.5	141.5	3416.5	2137.5	2864.5	1627.5	338.5	2879.5	0	0	0	2583.5	4944.5	0	2968.5	855.5	2580.5	0	3904	0	0	0	1923.5	0	2349.5	917.5	442.5	0	0	2972.5	0	0
500902	Post V1	0.08	1156	28168.5	34634.5	22586.5	0	15983	0.878009	0.673669	0.866878	0.800551	0.804777	0	0	1438	30362	3563	864	4923	2444	2937	1977	759.5	3049	1025	930	0	2297	5611.5	0	3287.5	1365	3376	453	3349	206	254	468	2320	0	2640	1509	913	226	356	2575	0	0
500905	Pre V	0.08	0.4	31611.5	53468	24548.5	0	20575	0.985327	1.04	0.94218	1.03055	0.999514	0	0	0	0	5501	585	5224	4234	4269.5	1267	21	1371	944	973	0	2033.5	756	0	4795	2491	935	0	0	199	1060.5	260	3156.5	0	3630	1214	866.5	731	91.5	3702.5	545.5	220
500905	Post V1	0.09	1323	33990.5	56386.5	27456	0	22104	1.05948	1.09676	1.05377	1.10714	1.07929	269.5	0	0	0	5713	257	4742	4265.5	4530.5	1264.5	320	1483	978	287	0	1916.5	448.5	0	5193	2711.5	1241	0	0	164	959.5	441	3455	0	3236	1500.5	807	1094	209	4000	606.5	366
500908	Pre V	0.08	0.4	28251	37232	24644	0	17638	0.88058	0.724192	0.945845	0.883446	0.858516	0	946	1159	37439	5669	1719	4836	7463	7181	1123	148	1917	375.5	182	0	1992	575.5	0	4325	2830.5	1389	0	0	0	1004	372.5	3429	0	3343	2376.5	416.5	0	0	4391.5	530	82
500908	Post V1	27.7	16503	28018.5	38354.5	24618.5	0	19197.5	0.873333	0.746026	0.944867	0.961558	0.881446	766.5	1668.5	996.5	36218.5	7339.5	2083	6056	8010.5	8517.5	2007.5	1066.5	2600.5	1671.5	895.5	0	2618	1470	0	5584.5	3384.5	2028.5	0	575	477.5	1258.5	968.5	4295.5	0	4407.5	4328.5	1081.5	583.5	318.5	4940.5	1010.5	904.5
500909	Pre V	0.09	0.4	26912	44530	21663.5	0	19929	0.838844	0.866144	0.831453	0.998197	0.883659	0	0	0	0	1515	15588	1903	1640.5	2430	8810.5	0	225	222	185	0	749	470.5	0	799	140	341	0	0	0	0	76.5	339.5	0	742.5	2763.5	495	0	0	779	0	0
500909	Post V1	0.09	494	25022.5	42571.5	20267.5	0	17832.5	0.779948	0.82805	0.777874	0.893188	0.819765	0	0	0	0	2782	15069.5	1987.5	1298.5	2646.5	8572.5	0	360.5	165	239	0	716.5	458.5	0	1038	215.5	541.5	0	0	0	0	186.5	404.5	0	894.5	2989	422.5	0	61	877	0	100.5
500915	Pre V	0.08	0.4	32916	43424.5	25531	0	21867.5	1.02599	0.844642	0.979889	1.09529	0.986452	0	0	0	0	4662.5	216.5	3506	2434.5	4712.5	1429.5	0	2462.5	6501	238.5	0	1537.5	978.5	0	2768.5	1799.5	902.5	1298.5	1866.5	0	318	193.5	2051.5	0	2290.5	2703.5	226.5	746.5	843.5	3054.5	0	268.5
500915	Post V1	0.08	1045	37047	47188.5	29605	0	23758.5	1.15475	0.917854	1.13625	1.19001	1.09972	228	0	0	0	4664.5	520	3920	3350	3735	1640	439	3619.5	7517	418	0	1874	1389	0	3011	2291	1107	1532	2096	291	648	554	2518	0	2543	3425.5	516.5	972.5	1248	3523	380	527
500922	Pre V	0.75	1912	38120.5	54797	29759.5	0	22707.5	1.18821	1.06585	1.14218	1.13737	1.1334	0	0	0	0	6740.5	0	5800.5	4606.5	2880.5	833.5	0	1530.5	806	473.5	0	1925.5	439	0	5854.5	2544	945.5	0	0	0	700.5	16138.5	3186.5	0	4731.5	1111.5	2541.5	273.5	45.5	3920.5	713.5	0
500922	Post V1	1.15	11877	34317	51487	27988.5	0	20787	1.06966	1.00146	1.07421	1.04117	1.04663	275	0	220	0	6362	252	6845.5	4429.5	3295	1136	50	1978	1707	619.5	0	2498	892	0	5557	3067	1215.5	0	0	325.5	861	15137	3836	0	4456	1350	2857.5	450	209	4506	1177	148.5
500935	Pre V	0.09	0.4	31350.5	52908	25114	0	18016	0.977191	1.0291	0.963884	0.902379	0.968139	0	0	0	0	8193	0	6620	3526	3924.5	1983	0	1501	1096.5	0	0	2340	0	0	6322	3679	586	0	588	0	7039	0	4381.5	0	5324.5	549.5	101.5	0	0	5970.5	542	0
500935	Post V1	0.1	369	31439.5	51309	25766	0	18450.5	0.979966	0.998001	0.988908	0.924142	0.972754	1182	0	0	0	9940.5	620	8571	6163	6660	1961	593	1880	1357.5	578	0	3428.5	4.5	0	8880.5	5326	2496.5	0	3390	897	7339.5	0	5912	0	6843	861.5	746.5	610	700	8790	1038	672
500936	Pre V	0.08	0.4	35036.5	55801.5	27801.5	0	18556	1.09208	1.08538	1.06703	0.929426	1.04348	0	0	0	46.5	142.5	139	86.5	861	2475.5	395.5	49.5	0	0	361.5	0	486.5	20669	0	101.5	0	322.5	243.5	0	0	1747.5	110.5	0	305.5	53.5	1378.5	0	0	0	73.5	0	299.5
500936	Post V1	73.9	2422	37836.5	59153	31359	0	20976.5	1.17936	1.15057	1.20357	1.05066	1.14604	0	0	0	288	60	248.5	242	1513	2288	423	241	71	59	232	0	172	20379	286.5	2	0	371	377	34	99.5	1633	99.5	121	799	138	1268.5	0	118	117	190	0	202.5
500937	Pre V	0.09	0.4	33945.5	46315	28927	0	11466	1.05808	0.900864	1.11023	0.574305	0.910869	10.5	0	17.5	75.5	415.5	101.5	166	1772.5	1588.5	677.5	287.5	2358.5	502.5	184	0	212.5	1330.5	15	248.5	38.5	253.5	136.5	60.5	41.5	78	588.5	154	0	146	1320	120.5	1243.5	285.5	123.5	0	92.5
500937	Post V1	0.08	73.3	40869	64516.5	33703	0	25789.5	1.27388	1.2549	1.29353	1.29174	1.27851	6	0	0	0	298.5	66	125	1483	1574	353	229.5	2192.5	471	138	0	164	780	0	251	4	157	73.5	51	0	47	643	84	0	128	2154.5	34	1590	324	97	0	96
500938	Pre V	0.08	306	37382	57113	29411.5	0	22084	1.16519	1.11089	1.12882	1.10614	1.12776	127.5	0	0	0	3741	194	3378.5	3353.5	3032	1127.5	74.5	2167	437	472	0	2060	456.5	0	2607	1860	866.5	924.5	0	77	753	17651	2325.5	0	2277	1044	526.5	259	0	2769.5	186	0
500938	Post B1	0.08	8020	37187.5	59077.5	29446.5	0	22004.5	1.15913	1.14911	1.13017	1.10215	1.13514	567.5	0	0	0	4312.5	680.5	4003.5	3986.5	3176	1365	270.5	2152.5	761.5	369.5	0	2806.5	865.5	0	2895.5	2207.5	1081	652.5	0	441	947.5	17295.5	2806.5	0	2425.5	1165.5	1234.5	704.5	266.5	3262.5	749	0
500940	Pre V	0.08	0.4	44247	64461	33428	0	28191	1.37917	1.25382	1.28298	1.41202	1.332	0	0	0	0	2171	286	2089	2309	2148	732	0	859	420	305.5	0	1353.5	1131.5	0	2074	769	793	739	0	78.5	291	7276	1396	0	1356	1255	611	398	224	1695	216.5	0
500940	Post V1	0.08	135	38954.5	59489.5	33716.5	0	26458.5	1.21421	1.15712	1.29405	1.32524	1.24766	0	0	0	0	1717	293.5	1464.5	1939.5	1554	337	198.5	558.5	573.5	241.5	0	817	815.5	0	849.5	437	553	362.5	71	8	189	5218	976.5	0	869	960.5	339.5	215.5	166.5	1175.5	0	0
500940	Post B1	0.08	1844	38650	56038	29944.5	0	23008	1.20472	1.08998	1.14928	1.15242	1.1491	0	0	0	0	1364.5	114	1723	2290	1306	550	0	689	434.5	370	0	596	890	0	1379.5	589	759	280.5	170	37	143.5	6025	924	0	932	976.5	221	258	154.5	1198	8.5	0
500944	Pre V	0.08	0.4	26411	28949.5	20083.5	0	17246	0.823228	0.563091	0.770812	0.863812	0.755236	142.5	0	0	0	4527.5	538.5	3333.5	3594	2734	1127.5	612.5	2137	1307	792	0	1964.5	854	0	4065	1567.5	1270	0	791	340	4675.5	7659	2824	0	3298.5	2707.5	1069.5	442	349	3287	943	656
500944	Post V1	40.1	915	26498.5	30655.5	22054	0	18343.5	0.825955	0.596274	0.84644	0.918783	0.796863	8.5	0	0	0	4344.5	310.5	4855.5	9432	5208	1230.5	455.5	2131.5	1440.5	522.5	0	2126	931.5	0	4852.5	1426.5	963.5	0	647	0	17999.5	7667.5	3317.5	0	3166.5	2471.5	1384.5	483.5	419.5	2910.5	563.5	205.5
500944	Post B1	193	8555	26083	28908	21098	0	17204.5	0.813004	0.562284	0.809749	0.861733	0.761692	0	0	0	0	4097.5	0	3595.5	6639	4164	547.5	108.5	1502	807	199	0	1238	668	0	4283	1264	810	0	405.5	0	17928	4344	2405	0	2782	2236	639.5	0	0	2527	243	0
500945	Pre V	0.1	0.4	27571.5	39423.5	22219.5	0	15540	0.8594	0.766819	0.852792	0.778362	0.814343	115.5	0	0	0	3556.5	441.5	3074.5	2366.5	2061	1116.5	253.5	3642	464.5	237.5	0	1354	2965.5	0	2655	1701.5	612	0	0	244.5	363.5	0	2055	0	2027.5	759.5	668.5	370.5	65.5	2389.5	424.5	0
500945	Post V1	0.14	2379	30476	42708	23826.5	0	16889.5	0.949933	0.830705	0.914469	0.845955	0.885266	0	0	0	0	5827.5	0	5264.5	2013.5	2713	1396	0	4491.5	315.5	0	0	1860	1178	0	4058	2944	418	0	0	81.5	288.5	0	2955.5	0	3258.5	522	178	142	0	3946.5	315.5	0
533079	Pre V	235	382	24202.5	38237.5	18781.5	0	13337.5	0.754389	0.74375	0.720841	0.668044	0.721756	293.5	0	0	0	5587.5	594	5038.5	4079.5	2734.5	1788.5	70	1402	1117.5	1129.5	0	2386.5	518.5	0	5060.5	2704.5	999.5	0	0	425	492.5	0	3435.5	0	3456	529	1768.5	350.5	160	4070.5	762.5	52
533079	Post V1	143	>25000	16521.5	30946.5	13061	0	8370	0.514973	0.601934	0.501286	0.419234	0.509357	457	0	0	0	4626	257	4324	3961.5	1850	1309	0	1483.5	1218	941	0	1851	437	0	5026	2622	1074	0	0	598	894.5	0	2854	0	3737	148	983	421.5	37	3710	854	243
533305	Pre V	0.15	0.4	23432	40637	20171	0	11686	0.730373	0.790422	0.77417	0.585324	0.720072	66	0	0	998	1577.5	572	1854	4533.5	3921	1509	774	813	7399	425	0	1172	3532	0	2102.5	712.5	636	0	0	825	432	556	1135	0	1194.5	1155	645	329	2653.5	1105	277	281
533305	Post V1	0.17	925	28997	50474	23232	0	16662	0.903833	0.98176	0.891652	0.83456	0.902951	137	0	0	677.5	2479.5	280	2191	5147.5	2955	959	384	1026	8061	462	0	1110	2741.5	0	2203	946	747.5	124	0	1430	400	150	1432.5	0	1497.5	1425	523.5	278	3240	1567	318	344
575044	Pre V	0.08	0.4	41353	62669	32440	0	25067	1.28897	1.21896	1.24506	1.25555	1.25213	157.5	0	0	0	5593	429.5	4472	4030	3612	1235	265	45361	1104	310.5	0	1673	1453	0	4180	2558.5	733	0	0	0	457.5	0	2773	0	3121	1595	381	770	404.5	3763	718	0
575044	Post V1	0.08	10.1	43992	70752	35769	0	28372.5	1.37123	1.37618	1.37283	1.42111	1.38534	226	0	0	0	5421	461	3548	3650	3716.5	1223	299	33012	720	431	0	1469.5	1024	0	3005	2165	964	0	0	266.5	461	0	2444	0	2586	1976	699	646	367	3089.5	633	428
575044	Post B1	0.08	245	39558.5	62965	31209	0	23973.5	1.23303	1.22472	1.19781	1.20078	1.21409	275	0	0	0	3981	570	3167	3150	3727	1288	330	33575	725	423.5	0	1620.5	1178	0	2832	1673.5	790	0	0	247	505	130	2022	0	2286	1620	654	514.5	494	2589	559.5	590
575065	Pre V	0.09	0.4	32079	54934	25579	0	24844	0.999899	1.06851	0.981731	1.24438	1.07363	591.5	0	0	17034	9249	692	8391	6015	3499	2443.5	0	2526.5	1347	1038	0	3734.5	1531.5	0	9004	5769	2748.5	0	0	1034.5	1782	0	5704	0	7056	3534	1070	727.5	61	8270	1600	1563.5
575065	Post V1	0.08	21.5	33472.5	55753	25950	0	28591	1.04333	1.08444	0.99597	1.43206	1.13895	700	0	0	15613	9285	686.5	8671	4634.5	5775	1812	99	3076	1494.5	1002	0	3468	1762	0	10591	4658	1933	0	0	258	1474	0	5600.5	0	7071	6920	1276.5	691	0	6884	1112.5	2007.5
575188	Pre V	0.08	0.4	25073	42645	19951	0	18802	0.781522	0.82948	0.765726	0.941748	0.829619	122.5	0	0	0	6722.5	193	6874	6249.5	4383.5	1409	92	2448	1199	802.5	0	2245	944	0	7257.5	2857	1339	0	0	0	1318	0	4074	0	4664.5	3636	1093	4372.5	3.5	4558.5	632	0
575188	Post V1	0.08	986	27788.5	43489	22230.5	0	18118.5	0.866164	0.845896	0.853214	0.907513	0.868197	308.5	0	0	0	7247	283	5694.5	6375.5	2398	1453	288	2073	857	445.5	0	2521	693	0	4972	3935	1259	0	0	456	1677	0	4455	0	5050	2069.5	850	12285.5	62	5136	802	0
575228	Pre V	0.09	367	29741	52056.5	22447.5	0	18956.5	0.927024	1.01254	0.861543	0.949487	0.937648	154	0	0	0	7112	226.5	6778.5	4151.5	3154.5	1611.5	0	4215.5	1246.5	292.5	0	2911	1182.5	0	5620.5	3722.5	1249.5	0	0	429.5	1436.5	0	4361.5	0	4799	875	1185.5	644	177.5	5302.5	887.5	0
575228	Post B1	0.09	5213	28429	49033	21411.5	0	17816	0.886129	0.953731	0.821781	0.892362	0.888501	65	0	0	0	6943.5	109	6227	3354	2611	1255	0	3489.5	1010	146.5	0	2286	962	0	5792	3653	1056.5	0	0	554	1552	0	3731.5	0	4534.5	593	1031	460	219	5310.5	829.5	0
575277	Pre V	0.08	0.4	31685	45306	23852	0	21842.5	0.987618	0.881238	0.915448	1.09404	0.969586	0	0	0	0	4745	0	4013.5	2975	3158	348.5	0	1606	913	0	0	1446.5	290.5	0	5244	2035.5	835	0	5800	0	379.5	0	3125	0	3254.5	3546	512	0	0	3363	48	0
575277	Post V1	0.08	6221	34975	58415.5	27188	0	25856	1.09017	1.13623	1.04348	1.29507	1.14124	331	0	0	0	7180	260	7055	4676.5	4263	954.5	0	2532	1379.5	433	0	3309	597	0	7312.5	3978	1451.5	0	8403.5	116	867	0	5103.5	0	5386	5289	1223	704	106.5	5306.5	786.5	0
575296	Pre V	0.57	0.4	26718	45059.5	21756.5	0	15945	0.832797	0.876444	0.835022	0.798648	0.835728	0	0	0	0	1706.5	233.5	1748	2122.5	2128	745.5	47.5	1032.5	506	114.5	0	1142	1873	0	1471	392	906.5	0	1373	0	977.5	4144	1173	0	1166	2191	700	57.5	0	1379	0	0
575296	Post V1	0.58	0.4	32774	52241	26124	0	21576	1.02156	1.01613	1.00265	1.08069	1.03026	0	0	0	0	2185.5	496	2350	2380	2678	1012	207	1096	163.5	627	30	1560	2062.5	0	2009.5	540	979	137	1190	111	1027	2357	1358.5	0	1395.5	3094	733	276	68.5	1696	0	61
575572	Pre V	0.07	0.4	32170	54152.5	25394	0	19881	1.00274	1.05331	0.974631	0.995793	1.00662	265	0	0	0	8713.5	245	7047.5	5545	4402	1619	739	3593	506	712	0	3040	328	0	6602	4090	886	0	0	191	1544.5	0	4641	0	4922	640	996	1507	119	6190.5	417	433.5
575572	Post V1	0.08	1625	37965	59763	30212.5	0	22943	1.18336	1.16244	1.15957	1.14916	1.16363	460	0	0	0	6912	606.5	6801.5	5580	4987	2256	1966	3253	839	750.5	0	2222.5	604	0	4983	3467	1076.5	0	0	398	1067	0	3596	0	4377.5	1660.5	830	1185	577	5056	755	599
575633	Pre V	0.09	0.4	29515.5	49603	23704.5	0	17249.5	0.919995	0.964818	0.909787	0.863987	0.914647	423	0	0	0	8748.5	0	8536	5049.5	2111	1354.5	0	1409.5	851	755	0	3406.5	5313	0	8458	5721	903	0	259	364	1843	0	5556	0	7696.5	1085	983	594	0	7157	388.5	144
575633	Post V1	0.09	499	24678	43340.5	20015	0	14295	0.76921	0.843008	0.768183	0.716003	0.774101	0	0	0	0	8152	0	8778.5	5163	5452.5	1010	0	1051.5	1188	0	0	2600.5	3844.5	0	7449	4036.5	1670.5	0	0	141.5	743	0	4549	0	6087.5	1438.5	494.5	159.5	0	5223.5	129.5	0
575653	Pre V	0.08	0.4	31716	53285.5	26295.5	0	17797	0.988584	1.03645	1.00923	0.89141	0.981418	0	0	0	0	6905	0	5238	5543	3173.5	1458	4731.5	1428	0	0	0	2811	376.5	0	5425	2966	784.5	0	0	0	216	0	3241	0	4793	0	168	0	0	5918.5	0	0
575653	Post V1	0.07	592	24035.5	43330.5	19166.5	0	13814.5	0.749184	0.842813	0.735617	0.691936	0.754887	0	0	0	45099.5	5231.5	111.5	4914.5	3649.5	2290.5	1108.5	3167.5	1087.5	0	287.5	0	1961.5	312	0	4197.5	1960.5	1407.5	0	0	0	0	0	2675.5	0	3437.5	55.5	489.5	0	0	3931.5	0	0
575747	Pre V	0.08	0.4	33634	53147.5	26537	0	18589	1.04837	1.03376	1.0185	0.931079	1.00793	169	0	0	2963	1229	309.5	802	2732	3006	548	284	457	169	205	0	563	356.5	0	553	553	3263	0	0	134	110	264.5	599	0	494	1030	191	82	368	811.5	81	2748.5
575747	Post V1	0.08	6.86	26257	44656	21410	0	14212	0.818428	0.868595	0.821723	0.711846	0.805148	76	0	0	1989	954	149	697	3257.5	3223	365	238	476	8	82	0	426	280	0	493	403	3238.5	0	0	58	51	215.5	487	0	424	775.5	184.5	3	201	574	0	3737.5
575759	Pre V	0.08	0.4	30047	53637	23661	0	18206	0.936561	1.04328	0.908117	0.911896	0.949964	0	0	0	0	6649	0	6913	4478	2441	997	0	2164.5	997.5	55.5	0	2604	874	0	7047.5	2722	1202	0	0	96	362	4469	3522	0	4354.5	640	628	0	0	5174.5	0	0
575759	Post V1	0.09	1794	29287.5	52188.5	23671	0	16975.5	0.912888	1.01511	0.908501	0.850263	0.92169	0	0	0	0	6527	0	6051	4338.5	3253.5	397	0	1891.5	836.5	55	0	2854.5	788.5	0	6364.5	2894.5	1414	0	0	0	318.5	4716.5	3493.5	0	4664	344.5	149	0	0	4847.5	0	0
598710	Pre V	0.08	0.4	23871	35080.5	20287.5	0	14247.5	0.744056	0.682344	0.778641	0.713624	0.729666	108.5	192	0	116.5	266	195.5	233.5	1362.5	2681	360.5	498.5	328.5	4257	245.5	0	359.5	747	0	378	102.5	363.5	269.5	104.5	98	202.5	1327	229.5	447.5	219	4282	143.5	120.5	1851.5	186.5	99	149.5
598710	Post V1	0.09	354	13736.5	23971	11919.5	0	8353.5	0.428165	0.466255	0.457475	0.418407	0.442576	29.5	93.5	0.5	201.5	61.5	93.5	56.5	467.5	1393	107.5	594.5	112	1815.5	65	0	139.5	490.5	0	142	5.5	127	77.5	45.5	24.5	35.5	320	36.5	13.5	46.5	3106.5	0	25.5	537.5	17	20.5	52
598710	Post B1	0.09	12114	32234.5	40929	26354.5	0	20543	1.00475	0.796102	1.01149	1.02895	0.960323	58.5	173.5	0	499.5	162.5	275.5	212	1474.5	2913.5	457.5	1197.5	221	6590.5	342.5	0	432.5	2057	0	433.5	110	637	299	44.5	97	338.5	694.5	207	943.5	226.5	7906.5	153.5	156	2531.5	175.5	17	266.5
ACE-MS-001	Pre V	0.09	0.4	42810.5	44900.5	36608.5	0	27432	1.3344	0.873351	1.40505	1.374	1.2467	512.5	0	0	0	8707	639.5	7478	5271	2509	1725	17	2175	508	921.5	0	2719	1411	0	5930.5	3637	1104	11	0	356	875	0	4042.5	0	4574	1010.5	1055	450.5	273.5	5656	898	87.5
ACE-MS-001	Post V1	0.1	0.4	42646.5	67603	34802	0	25258	1.32929	1.31493	1.33571	1.26511	1.31126	0	0	0	0	7651.5	63	7019.5	5232	4311.5	1208.5	0	1299	148.5	0	0	2607.5	827.5	0	5644	3582.5	1008.5	0	0	0	230.5	0	4009.5	0	4325.5	682	580.5	73.5	0	5693	0	0
ACE-MS-001	Post B1	0.09	0.4	41585.5	67197.5	32971.5	0	24610.5	1.29622	1.30705	1.26546	1.23268	1.27535	204.5	0	0	0	8542.5	361	5975.5	6532	6038.5	1624.5	74.5	2027	601.5	903.5	0	3045.5	2014.5	0	5845.5	3724.5	1728.5	0	0	147.5	741	0	3832.5	0	4289.5	1068.5	762.5	467.5	0	5838.5	442.5	268
ACE-MS-002	Pre V	0.09	0.4	17811	19212.5	17501	0	12761	0.555167	0.373699	0.671694	0.639169	0.559932	0	0	0	0	5765	0	5288	2548	1952.5	666	0	1360	253.5	0	0	1609.5	0	0	2643.5	2909	591.5	0	0	0	692	195	3360	0	1627	298	2962.5	0	0	4499	0	0
ACE-MS-002	Post V1	0.1	0.4	39203	54111	31450.5	0	23836	1.22195	1.0525	1.20708	1.19389	1.16886	903	0	0	0	11604.5	0	9465.5	8672.5	2823	1190	0	0	0	0	0	1910	0	0	7047	7901	0	0	0	1066	888	0	4629	0	7741	276	5603	0	0	8976	0	0
ACE-MS-003	Pre V	0.1	2.69	34430	58066	28446	0	21199	1.07318	1.12943	1.09177	1.06181	1.08905	110.5	0	0	0	7820	158	6067	4817	7397	1784	3176	2022	704	638.5	0	2592	311	0	7786	3335.5	2339.5	0	0	0	6340	0	4060	0	5035	915.5	2116	735.5	0	5631	915	229
ACE-MS-003	Post V1	0.11	60	34076	59228.5	27874	0	21810	1.06214	1.15204	1.06981	1.09241	1.0941	118	0	0	0	7333	264	5809	3408	5703	1764	3162.5	2303	648	24	0	1698.5	305	0	5704	2588	1761	0	0	0	5817	0	4273	0	4485	468	1425	646	0	4970.5	1087	537
ACE-MS-004	Pre V	0.09	0.4	31878	55617.5	26951	0	18555.5	0.993634	1.08181	1.03439	0.929401	1.00981	293	0	0	25917.5	8852.5	895.5	9529.5	4182	4051.5	1368	5396	2972.5	1408	650	0	3866.5	757	0	7155	4709.5	1613.5	0	8603	239	977	1232	5410	0	6278.5	1612	1413.5	188	0	5910	622	0
ACE-MS-004	Post V1	0.09	10.3	34768.5	60816.5	27268.5	0	22387.5	1.08373	1.18293	1.04657	1.12134	1.10864	16	0	0	24592.5	12280.5	731.5	8718.5	5815.5	3568	1265.5	6326.5	2349	906.5	546	0	3813.5	27	0	9926.5	4506.5	1325	0	8551.5	0	1240.5	13.5	5507.5	0	7831	1893.5	558	0	0	7169	541	0
ACE-MS-004	Post B1	0.09	108	38818	66680	32363	0	25702	1.20995	1.29698	1.2421	1.28735	1.2591	1048	0	0	18443	12930	1477.5	9701.5	7366	4446	2138	5644	3864	2216	745.5	0	3565	1542	0	9111	6975	2791	0	10136	597	1561	810	7160	0	8690.5	3288	2923	736	211	9610	1359	918
ACE-MS-005	Pre V	0.08	0.4	51149	78150.5	40146	0	33761	1.59431	1.52009	1.54082	1.69101	1.58656	360	0	0	0	7007	542	5699	4000	3491	1795	1	937.5	3763	469	0	2089	188	0	4010	3539	1254	0	0	97	541	0	3600	0	3546	2091	817	587.5	1208.5	5024	565	0
ACE-MS-005	Post V1	0.08	0.4	50257	75650.5	40127	0	32157	1.5665	1.47146	1.54009	1.61067	1.54718	318	0	0	0	7321.5	396.5	6169	3557	2793	1998	0	795	4270	142	0	1879	641.5	0	4412	3533	1074	0	0	0	450	0	3487	0	3265	1788.5	636	621.5	1236.5	4846	782	0
ACE-MS-006	Pre V	0.08	0.4	49024	70341	39630	0	31315	1.52807	1.36819	1.52101	1.56849	1.49644	738	0	263	92576	8841	2432	7196	6879	6549.5	2409	439	2059	1477.5	853.5	0	3263	814	0	6043	4852.5	2265.5	0	0	53	782.5	2248	4838.5	0	4996	5625	1317.5	882	662	6224	1262.5	519
ACE-MS-006	Post V1	0.09	25.6	47392	71200.5	39697	0	30762	1.4772	1.38491	1.52358	1.5408	1.48162	535	0	242	94297	8143	2085	6429	6365	7532	2200.5	278	1963	1866.5	560	0	2681.5	1166	0	6333	3638.5	2191	0	0	448.5	867	2064	4155.5	0	4360	6961	889	748	398	5596	1004	686
ACE-MS-007	Pre V	0.09	0.4	35164	61039.5	27664.5	0	25103	1.09606	1.18727	1.06177	1.25735	1.15061	607.5	0	0	0	8926.5	60.5	9354.5	7268	6004.5	1450.5	0	2587.5	1772	197.5	0	3229.5	1066.5	0	9848.5	5089.5	1942.5	0	0	173.5	1379.5	0	5234.5	0	6993.5	3356.5	1047	615.5	2238.5	7513.5	560.5	95.5
ACE-MS-007	Post V1	0.08	0.4	32134	57424	25519	0	24945	1.00161	1.11694	0.979428	1.24944	1.08686	138	0	0	0	10378.5	0	8283	6974	5453	937	0	2436	967	624.5	0	3534.5	737.5	0	8154	4591.5	1244	0	0	36	1046.5	0	5496.5	0	6728.5	3317	1401	490	2222	6534	1071	0
ACE-MS-007	Post B1	0.09	0.4	34563	61576	28269.5	0	26133.5	1.07732	1.1977	1.08499	1.30897	1.16725	217	0	0	0	10746	2336	12129	8645.5	5725	3653	0	2431	1088.5	262	0	3553	1059.5	0	9519	4956	1383	0	0	52.5	811	0	5973	0	7848	3376	1313.5	538	2104	7083	507.5	0
ACE-MS-009	Pre V	53.4	44.6	34843	57158.5	28285.5	0	22095	1.08605	1.11178	1.08561	1.10669	1.09753	0	0	0	2113	2287.5	680	2689.5	2567	2887.5	2081.5	111.5	0	4098.5	926	47.5	1933.5	1400.5	0	1117.5	90.5	1355.5	1343.5	407.5	0	0	741	1197	0	1431.5	2378.5	822.5	22060.5	2370	2369.5	0	29.5
ACE-MS-009	Post V1	49.2	18369	33410	58390	27334.5	0	21856	1.04139	1.13573	1.04911	1.09472	1.08024	0	0	0	2052	1982.5	442	2451	2483	4017	1670	0	0	4038	0	0	882	285	0	186.5	0	990	1038	0	0	0	648.5	195	0	930.5	1705	0	21867.5	1013	2132.5	0	0
ACE-MS-027	Pre V	0.09	13361	45264	70037	37109.5	0	25417.5	1.41087	1.36228	1.42428	1.2731	1.36763	21	0	0	9578	3140	360.5	3166	6805.5	5438.5	1236	295.5	1476.5	1096.5	660.5	0	1530.5	952	0	3105.5	1164	1251	0	0	413.5	378.5	292.5	1938	0	2144.5	2761	1206.5	584.5	701.5	2134.5	0	98.5
ACE-MS-027	Post V1	95.1	12925	34169.5	59907	28415.5	0	20606	1.06506	1.16524	1.0906	1.03211	1.08825	0	0	0	0	8028	477	7380	4882	6143	1344	0	7635.5	1474	521	0	3751.5	1281.5	0	8372.5	3186	1512	0	0	0	172	0	4816	0	5823	852.5	1517.5	24200.5	0	6349.5	0	513
ACE-MS-031	Pre V	0.09	0.4	36184	60520.5	28581	0	23321	1.12785	1.17717	1.09695	1.16809	1.14252	0	0	0	2109	4369	562	4006	4738.5	5572	945.5	375	2682.5	1908	1362	0	2333.5	1519	0	5033.5	1811	1216	0	0	428.5	735	0	2671	0	2905.5	3832	2201	392.5	362	3052.5	578.5	64
ACE-MS-031	Post V1	0.09	0.4	40709.5	63002	31429.5	0	26858.5	1.26891	1.22544	1.20628	1.34528	1.26148	220	0	0	1100	4598.5	760.5	5316.5	5589	5096.5	1217.5	410.5	2670.5	2222.5	1211.5	0	2303	1364.5	0	5556.5	2214.5	1456.5	0	0	424	882.5	0	3453	0	3822	4459.5	2108.5	658.5	714.5	3665.5	767.5	456
ACE-MS-032	Pre V	0.09	0.4	46263	75894	37293.5	0	35042.5	1.44201	1.4762	1.43134	1.7552	1.52619	45.5	0	0	0	8780.5	265	6817	6515.5	5616.5	1424.5	503.5	5344.5	530.5	396.5	0	2668	1229.5	0	6530.5	3490.5	984	424	0	0	2308.5	0	4307.5	0	5055.5	5688	732.5	22.5	0	6183.5	333.5	71.5
ACE-MS-032	Post V1	0.08	27.3	44648.5	77116.5	37665.5	0	33944.5	1.39169	1.49998	1.44562	1.7002	1.50937	420.5	0	0	760.5	8631.5	657.5	7633.5	7711.5	6875.5	1843.5	1219.5	5661	893	463.5	0	3226	1650.5	0	7672.5	4562.5	1328.5	1153.5	0	392.5	3049.5	0	4894.5	0	5274.5	5324	1404.5	932	0	6058.5	795.5	59.5
ACE-MS-032	Post B1	0.08	13658	45385	74660.5	37931.5	0	34508.5	1.41465	1.45221	1.45582	1.72845	1.51278	673	0	0	1096.5	9872.5	806.5	9051.5	6598.5	4604.5	2114.5	1425.5	6030.5	1507	1186.5	0	3031.5	1418.5	0	7864.5	4404.5	2070.5	1203.5	0	874.5	2996	0	5418	0	5463.5	5558	1351.5	937.5	162.5	6410	1093.5	552.5
ACE-MS-058	Pre V	0.09	0.4	41656.5	67130	35201.5	0	32733	1.29843	1.30573	1.35105	1.63952	1.39868	179	0	3262	83622.5	6969.5	287	4723.5	7187	8230	1745	884.5	2170	2304	873	0	2260	1632	0	5332	3240	1998.5	0	0	156.5	577	172	3693.5	1521.5	3634.5	6855	915	122	730	4279	682	702
ACE-MS-058	Post V1	0.09	50.7	24917	44671	19588	0	18394	0.77666	0.868887	0.751794	0.921312	0.829663	350.5	0	1758	57362.5	3722	637	3598.5	4125	3914.5	1154	539	1459	1481	402.5	0	1377	1199	0	3286	1836	1123	0	0	249.5	440	205	2163.5	1191	2173	4051	809	356	476.5	2468	534	412
ACE-MS-058	Post B1	0.1	2840	25804	44443.5	20692.5	0	19429.5	0.804308	0.864462	0.794185	0.973178	0.859033	258.5	0	1575	58697	3965.5	460	3368	4429	5114.5	1126	565	1611	1319.5	322	0	1345	1256	0	3588	1801	1374	0	0	53	392	42	2341.5	873	2315	3930.5	592	181.5	644	2626	488	183
ACE-MS-061	Pre V	0.07	0.4	42264	66095.5	36200	0	23590	1.31736	1.28561	1.38937	1.18157	1.29348	303	0	0	0	8467.5	247	6910	5350.5	3427.5	2144.5	0.5	2198	1711	283	0	2860.5	1073	0	6678	4399	1263	0	0	135	641	0	4676.5	0	4893	755	776	1015	3	5925.5	909	13
ACE-MS-061	Post V1	0.08	0.4	38058	61487.5	32361	0	21209.5	1.18626	1.19598	1.24203	1.06233	1.17165	262	0	0	0	8408	0	6770.5	4688	4717	1953.5	0	2272	1611.5	416.5	0	2736	818	0	5881.5	3866	1620	0	0	32	561	0	4199	0	4813.5	543.5	1455.5	523	0	5695	841	0
ACE-MS-063	Pre V	0.09	0.4	39506	63624	32569	0	30157	1.2314	1.23754	1.25001	1.51049	1.30736	0	0	0	0	2701	1254	2643	2472	3148	1533	527.5	1353	1041.5	349	0	1732	5481	0	3594	1022	1687.5	22	0	87.5	338	246	1747.5	0	2165	4846	698.5	363	208	1968	0	367
ACE-MS-063	Post V1	0.1	0.4	47817	77563	40627	0	36837	1.49045	1.50866	1.55928	1.84508	1.60087	15	0	0	0	3145	1433.5	2901	2854.5	3606	2077	764	1545	914	713	0	2117.5	6087	0	4036.5	1300.5	1714	87.5	0	122	544	341.5	1894	0	2256.5	6598	845.5	441	491.5	2242.5	130.5	404
ACE-MS-065	Pre V	0.08	0.4	44879.5	74097.5	35611.5	0	37988.5	1.39889	1.44126	1.36678	1.90275	1.52742	0	0	0	0	10444.5	0	8435	8191	6714	1211	0	4508.5	3851.5	192.5	0	2872.5	377.5	0	8834.5	4216.5	1421.5	0	0	0	481	0	5366.5	0	5790.5	11432.5	756.5	415.5	379.5	6426	80.5	1040.5
ACE-MS-065	Post V1	0.08	5.53	45307	73629	34373	0	36372	1.41221	1.43214	1.31925	1.82179	1.49635	251	0	0	0	8105	302.5	7243.5	7740	6348	1675	0	3619	3688.5	956	0	3188	939.5	0	8240	3935	884	0	0	0	706	0	5186	0	5951	11796	609	327.5	498	6374.5	377.5	1839
ACE-MS-066	Pre V	0.09	0.4	26206	44238	19912	0	17041	0.816838	0.860465	0.76423	0.853544	0.823769	446	0	0	0	7375	0	5323	3737	2356.5	306	0	0	0	0	0	1087.5	0	0	4208	3997.5	0	0	1724	0	1199	0	2902	0	5060	0	0	0	0	5500	208	0
ACE-MS-066	Post V1	0.08	0.4	25804	46156	20154	0	17030	0.804308	0.897771	0.773518	0.852993	0.832147	124	0	0	0	8817	0	7879.5	4917	3648	911	0	1275.5	203	0	0	1694.5	0	0	7923.5	5566.5	807	0	1435	0	756	0	4738	0	6900	0	909	328	0	6669	260	0
ACE-MS-066	Post B1	0.08	0.4	26384.5	47460	20585	0	17208	0.822402	0.923135	0.790059	0.861908	0.849376	19.5	0	0	0	9556	0	7847	5806	5080	526	0	938	138	0	0	2696	0	0	7589.5	4595.5	368	0	1299.5	75	869.5	0	4360.5	0	6759	0	520	389	0	6961.5	422.5	0
ACE-MS-067	Pre V	0.08	0.4	32651	50728	27322	0	17330	1.01773	0.986701	1.04863	0.868019	0.980269	170	0	0	0	3303	160	2643	4454	3862	895	347	7754	1770	770	0	1158	782	0	3117	1265.5	929	0	0	212.5	595.5	42	1969	5803	1868	1760	858	2842	259	2501	405.5	1077
ACE-MS-067	Post V1	0.08	0.4	25241	43778	20854	0	11860	0.786759	0.851517	0.800384	0.59404	0.758175	128	0	0	0	1989	167	1541	3051.5	2211.5	467	412	5679.5	1284.5	737	0	745	849	0	2403	636	960	0	0	48	330	56.5	1396	4651	1429	1522	659	1244.5	91	1501	220	888
ACE-MS-070	Pre V	0.08	0.4	39777.5	61656	32852	0	24353	1.23986	1.19926	1.26087	1.21978	1.22994	242	0	0	0	2885	411	2385	2225.5	2747	10008	245	1222	666.5	258	0	1144	696	0	2415	1372	507	177	0	121	662	0	1867.5	0	1747	3010.5	487.5	1234	24	1987	280	0
ACE-MS-070	Post V1	0.08	0.4	38697.5	64263	31646	0	25398	1.2062	1.24997	1.21458	1.27213	1.23572	91	0	0	0	3873	362	3871	2328	4353	10506.5	62.5	1086	616	321.5	0	1437	509	0	2585.5	1623	761	108.5	0	0	349	0	2269	0	1879	3599	502	1168	0	2808	381	0
ACE-MS-071	Pre V	0.08	0.4	33565	43626	26823.5	0	23975	1.04622	0.848561	1.0295	1.20085	1.03128	70.5	0	0	0	7957.5	84.5	6474.5	3889	601.5	916.5	0	1051.5	457.5	21.5	0	2229.5	0	0	5790	4667	889.5	0	0	0	978.5	0	3785.5	0	4808.5	3227.5	34.5	22344.5	58.5	5923.5	213.5	0
ACE-MS-071	Post B1	0.09	0.4	29744	53231	24656	0	22256	0.927117	1.03539	0.946306	1.11475	1.00589	0	0	0	0	6902	0	5900	4117	1817	460	0	764	121	0	0	1671	0	0	6868.5	2838	898	0	0	0	336.5	0	3528	0	4342	1790	0	18741.5	0	5229	0	0
ACE-MS-072	Pre V	0.09	0.4	23484	39230	18316	0	14962	0.731994	0.763055	0.702974	0.749411	0.736859	0	0	0	0	8423	0	8118	6464	5436	1377	0	856	7773	1040	0	3205.5	2485	0	7888.5	4277	2329	0	0	351	989	0	5246.5	0	6139	0	986	456	2474	6595	0	55
ACE-MS-077	Pre V	0.07	0.4	34297	57094.5	28026	0	20860	1.06903	1.11053	1.07565	1.04483	1.07501	376	0	0	0	4786.5	700	4266	3272.5	4213	1869	486	4994.5	933	739	0	2045	1055	0	3246.5	2175	1083	142	0	305	713	817	2754.5	2965	2677	1845.5	1026	1122	373	3329	464	142.5
ACE-MS-077	Post V1	0.08	6.44	36099	42944	27026	0	23305	1.1252	0.835295	1.03727	1.16729	1.04126	0	0	0	0	5289	252	3957.5	3050	3224	1435.5	56.5	2715.5	543	314	0	1785	391.5	0	3419.5	2275	535.5	0	0	0	312	0	2561.5	6739.5	2196.5	1728	458.5	1248	0	3659	197	0
ACE-MS-077	Post B1	0.08	357	38581	62653.5	30920.5	0	25361.5	1.20257	1.21866	1.18674	1.2703	1.21957	144.5	0	0	0	5663.5	510.5	4510	2943.5	3765.5	1398	0	3506	308	125.5	0	1605	427	0	3257.5	2336	435	0	0	0	248	0	2693	0	2679	1804.5	671	1457	47.5	3724	261.5	0
ACE-MS-079	Pre V	0.09	0.4	32917.5	33710	24487.5	0	22810.5	1.02603	0.655687	0.939839	1.14252	0.941021	238.5	0	0	16689	5578	469.5	5797	3427	3508	1867	129	1745	791	708	0	2294	816.5	0	4568	2708.5	1395.5	0	0	334	799.5	0	3441.5	0	3752	2399	1171	803	302	4109	834	319.5
ACE-MS-079	Post V1	0.09	0.4	22351	37810	18067.5	0	16379	0.696678	0.735435	0.693437	0.820386	0.736484	185	0	0	10361.5	4307.5	587	3588	2666.5	2080	1295.5	281.5	1255.5	1043	549	0	1658	792	0	3211	1750	919	0	0	225.5	713	0	2181	0	2471	1664.5	616	602	223.5	2745	638	205
ACE-MS-079	Post B1	0.08	0.4	17104.5	34941	13241	0	11706	0.533145	0.679631	0.508194	0.586326	0.576824	7	0	0	5091	3054.5	235	2926.5	1773.5	1444	792	173	1015	437.5	195	0	991.5	352	0	2460	1138	528	0	0	0	378	0	1515.5	0	1782.5	956	444.5	321	173	1923.5	322	0
ACE-MS-080	Pre V	0.08	0.4	23620.5	43466.5	19118.5	0	14337.5	0.736248	0.845458	0.733775	0.718132	0.758403	0	0	0	0	2510.5	245	2176	1858.5	1995.5	404	154.5	1158.5	667	433	0	1087.5	901.5	0	2783	1057.5	997.5	0	0	8.5	159.5	0	1436	0	2040.5	1127	599.5	869.5	370.5	1686.5	100	29.5
ACE-MS-080	Post V1	0.08	0.4	30446	50969.5	24232.5	0	18329.5	0.948998	0.991398	0.930052	0.918082	0.947132	219.5	0	0	13	3041.5	378.5	2588.5	3171	2613	648.5	336	1579.5	909.5	545.5	0	1388.5	1144.5	0	3218.5	1403.5	1101.5	0	0	249	477	175.5	1878.5	0	2650	1720	908.5	1187.5	591.5	2168.5	269.5	157
ACE-MS-080	Post B1	0.07	0.4	28357	49086.5	22947.5	0	16550	0.883884	0.954772	0.880733	0.828951	0.887085	0	0	0	0	2537.5	143.5	2630.5	2151.5	2855	615.5	178.5	1494.5	691.5	390	0	1298.5	1090.5	0	3030.5	1258.5	749.5	0	0	49.5	319.5	53.5	1687.5	0	1856.5	1527	714.5	670.5	674	2011.5	177.5	0
ACE-MS-082	Pre V	0.09	0.4	43273	68184.5	32684	0	27447	1.34881	1.32624	1.25442	1.37476	1.32606	0	0	0	0	10261.5	29.5	7331	5580	5193	1455.5	0	2232	950	837	0	3505.5	2776.5	0	8019	4380	2188	0	0	0	2058.5	1196	4788.5	0	6128.5	874	736.5	0	0	7083.5	709	0
ACE-MS-082	Post V1	0.09	10.9	45951	71883.5	36246.5	0	29412	1.43229	1.39819	1.39115	1.47318	1.4237	0	0	0	0	9308.5	0	11879	5802	4965	1505	0	2124	1249	952	0	3516	2845	0	9091.5	4553	2286	0	0	142.5	1770.5	921	5683.5	0	6865	569	1537.5	537	0	6660.5	1140	0
ACE-MS-082	Post B1	0.09	14.3	50714.5	77692	39746	0	34853	1.58077	1.51117	1.52547	1.7457	1.59078	749	0	0	0	10874	714	11510	7749	8333	2099.5	0	2080	1228	1625.5	0	4051.5	3252	0	10000	5848	2245.5	0	0	298	2529	1082	5986	0	7233	984	1362	827.5	0	8250	1112.5	1.5
ACE-MS-083	Pre V	0.07	0.4	42407	66100.5	34689	0	28579	1.32182	1.28571	1.33138	1.43146	1.34259	415	0	0	0	6099	194	6207	4027	3551	1200	0	2445	961	552	0	2250	938	0	5016.5	3147	1004	0	0	131	609.5	1329.5	3186	0	4078	2349	1088.5	477	261.5	4238	773	0
ACE-MS-083	Post V1	0.07	0.4	43523	68606	33565.5	0	28937	1.35661	1.33444	1.28826	1.44939	1.35717	155	0	0	0	6400.5	495	6325	4227	5125	1381.5	118	2839.5	1107	807	0	2615	927	0	5273.5	3415	1503.5	0	0	262	677	1405	3730	0	4224	2580	1190.5	506.5	404	4507	708	230
ACE-MS-083	Post B1	0.08	76.5	32085.5	52643.5	25252	0	19463	1.0001	1.02396	0.969181	0.974856	0.992024	567.5	0	0	0	9692	0	8239.5	4027.5	2135.5	741.5	647.5	901.5	426.5	0	0	2414.5	0	0	7106.5	5499.5	593.5	0	0	485.5	1027.5	0	4907.5	0	6603.5	0	11.5	1790.5	0	7043.5	149.5	78.5
ACE-MS-084	Pre V	0.09	0.4	25353	45279.5	21219	0	15074.5	0.79025	0.880723	0.814393	0.755046	0.810103	111.5	0	0	0	5939.5	0	4728.5	1339	1045.5	0	857.5	0	0	0	0	584.5	0	0	3669.5	3628	0	0	0	0	446.5	0	2577.5	0	3967.5	0	0	2925	0	4097	0	0
ACE-MS-084	Post V1	0.08	0.4	38970.5	63927	30759	0	23776	1.21471	1.24343	1.18054	1.19088	1.20739	0	0	0	0	11096	0	8616	4338	832.5	0	1086	0	0	0	0	1748.5	0	0	9466	6551	0	0	0	0	0	0	5481	0	9454.5	0	0	3557	0	9879	0	0
ACE-MS-084	Post B1	0.07	242	38181	65561	30784	0	26397	1.1901	1.27521	1.1815	1.32216	1.24224	665.5	0	0	0	13465	0	12982	3738	1793	0	409	0	0	0	0	1953	0	0	9284	7687	0	0	0	0	1035	0	6048	0	9721	0	0	4465	0	10272	0	0
ACE-MS-086	Pre V	0.08	0.4	44206	67738.5	34604	0	27438	1.3779	1.31757	1.32811	1.37431	1.34947	64	0	0	4334	9763	435	8600	7787	8187	2507	2253	2110	1310	786	0	2988	776	0	6907	4330.5	819	0	0	392	681.5	0	5118	0	5811	802.5	737	234	0	7254	884	0
ACE-MS-086	Post V1	0.08	340	41951	65656	34038	0	26125	1.30761	1.27706	1.30639	1.30854	1.2999	297	0	0	3517.5	9598.5	1346.5	7610	7539	5480	2782	2498	2600.5	1232	573	0	3125	854	0	7619.5	4763.5	1629	0	0	500	699	0	5275.5	0	5285	947.5	1012	818	0	6412	1048	0
ACE-MS-087	Pre V	0.13	8.1	34105	57856	27076	0	19887	1.06305	1.12535	1.03919	0.996093	1.05592	167	0	0	0	8832	581.5	8235	5888	3943	2158	10.5	1903	1425	302.5	0	3420	796	0	7874	5040.5	1605	0	0	236	1482	0	4912	0	5916.5	81	1366	2912	142	6440	512	66
ACE-MS-088	Pre V	0.08	0.4	32973	58401	26772	0	20351.5	1.02776	1.13595	1.02752	1.01936	1.05265	185	0	0	0	7169	273.5	7833	5988	4625	1902.5	0	3772	2136.5	525	0	3651.5	1207	0	8107	3482.5	2320	0	0	239	888.5	8066	4422	0	4608	103	2166	0	0	5582	0	424
ACE-MS-088	Post V1	0.09	27.8	31824	57309.5	25082.5	0	19201.5	0.99195	1.11472	0.962675	0.961758	1.00777	0	0	0	0	5817.5	233.5	6871	4757.5	3691.5	1072.5	0	2731.5	1404.5	260.5	0	2946.5	809.5	0	7584.5	2236.5	1933.5	0	0	0	439.5	7060.5	4134	0	4463	0	1345	0	0	4841	0	120.5
ACE-MS-088	Post B1	0.08	27.2	32837	56497	26682	0	18803	1.02353	1.09891	1.02406	0.941798	1.02208	0	0	0	0	5309	0	5883.5	4125	3203	919.5	0	2004	1275	525	0	2346	0	0	6862	2465	815	0	0	0	159.5	5970	2895	0	4094	0	1357	0	0	4017	0	0
ACE-MS-090	Pre V	0.09	0.4	31341	55000	25759	0	17087.5	0.976895	1.06979	0.988639	0.855873	0.9728	581	9876	0	0	7875	165.5	7184	5675.5	2925	1405.5	0	5716.5	1091	432.5	0	2789	648	0	6247.5	4618	1646	0	0	0	1333	0	5071.5	0	6401.5	568	1039	10358	664	6742	810	0
ACE-MS-090	Post V1	0.09	3.13	28434.5	50232.5	22520	0	16513	0.8863	0.977063	0.864325	0.827097	0.888696	0	9715	0	0	7548.5	0	6685.5	4695	3581.5	520.5	0	4320.5	155	0	0	1944	274	0	6978.5	3860.5	1097.5	0	0	0	914.5	0	4087.5	0	5178.5	0	0	9441.5	0	5702.5	0	0
ACE-MS-090	Post B1	0.08	7.54	33414	55902	28188.5	0	20677.5	1.04151	1.08734	1.08188	1.03569	1.06161	684	9654	0	0	8592	565	7996	4801	3584	1416	0	3799	987	416.5	0	3328	515.5	0	7776	4520.5	1357	0	0	39	1558.5	0	4917.5	0	6005	439.5	1002.5	9680	353	6004	686	0
ACE-MS-092	Pre V	0.1	0.4	37087	61573	28806.5	0	24671.5	1.156	1.19764	1.1056	1.23574	1.17375	151	0	0	0	8481.5	223	7862.5	6001	3086	1957	0	1089	1083.5	379.5	0	2944.5	0	0	8007	3999.5	880.5	0	0	11	870	0	4496	0	5267	377	981	524	0	6534	165	0
ACE-MS-092	Post V1	0.09	1524	36169.5	62125.5	28566	0	25005.5	1.1274	1.20839	1.09637	1.25247	1.17116	0	0	0	0	8514.5	0	6907.5	4514.5	3567.5	5060.5	0	1326.5	979	241	0	2724.5	0	0	6507.5	4087	968.5	0	0	0	644.5	0	3870.5	0	5295.5	525.5	934.5	117	0	5906.5	1.5	0
ACE-MS-092	Post B1	0.09	1307	42449	68210.5	32468.5	0	27645.5	1.32313	1.32675	1.24615	1.3847	1.32018	0	0	0	0	9402	0	8192.5	4270.5	3052.5	1711.5	0	134.5	299.5	0	0	1988.5	0	0	6659.5	3913.5	0	0	0	0	0	0	4344.5	0	5271.5	0	0	0	0	6381.5	0	0
ACE-MS-095	Pre V	0.07	0.4	49101	78089	40901	0	29806	1.53047	1.51889	1.56979	1.49291	1.52802	100	566.5	467	0	5981.5	699.5	6874.5	3841	4630	2390	438	2478	1023.5	529	0	2745	772	0	4477	2911.5	2452	4909	169	465	623	87	3590	0	3622	2309	925.5	431	660	4638	0	0
ACE-MS-095	Post V1	0.08	0.78	45063.5	71135	36909.5	0	26297	1.40462	1.38363	1.4166	1.31716	1.3805	0	825.5	18384.5	0	5559	733	4104	3774	3361	2084.5	581	1596.5	692	313.5	0	2229	638.5	0	3309.5	1918	1550	4781	0	145.5	390	0	2510.5	0	2885	2460	626.5	0	341	3525.5	0	0
ACE-MS-095	Post B1	0.08	198	47276	55316	37088.5	0	30095	1.47359	1.07594	1.42347	1.50739	1.3701	176.5	0	0	0	6244	782	5628	4137	4816	1634	21	1778.5	903	576	0	2214	588	0	3955	2865	1574	2740	306	466	647	0	3078.5	0	3775	1908	823.5	331	658.5	4522	319	0
ACE-MS-097	Pre V	0.09	0.4	34602.5	57538	27998	0	20441	1.07856	1.11916	1.07457	1.02384	1.07403	333	0	0	0	6983	623.5	7131.5	4072	4083	1868	762	2424	2365	723	0	2910	1532	0	7314	3059	1869	0	0	282	1016	0	4451	0	4889.5	861.5	1798	1218	227	4503	711	502
ACE-MS-097	Post V1	0.09	1.63	27334	46709.5	22533	0	14267	0.851998	0.908537	0.864824	0.714601	0.83499	235	0	0	0	6304	851	6398	4439.5	3176	1796.5	614	1990.5	1122.5	1234	0	2604.5	1263	0	6366	2798	1917	0	0	283	791	335	3938	0	4159	726	1292	817.5	190	4567	826	106.5
ACE-MS-097	Post B1	0.08	30.4	37227.5	60841	30417	0	21493.5	1.16038	1.18341	1.16742	1.07656	1.14694	716.5	0	0	0	10190	739	9567.5	5891	5508	2952	330	2897	1701	1848	0	3795	1784.5	0	9959	5141.5	2449	0	0	341	1313.5	165.5	6294.5	0	6534	924	2076	737	319	7181	821	447
ACE-MS-098	Pre V	0.1	0.4	43298	73619	36430	0	29516	1.34959	1.43195	1.3982	1.47839	1.41453	456	0	0	0	9004	1766	8107.5	5520	5798	2299.5	63	2593	938.5	884.5	0	3108	877	0	9419	4477	1437	0	0	218	1101	14770	5674	0	7215	3094	1408	732	0	6247	728	184
ACE-MS-098	Post V1	0.09	17959	43308	72825	35349.5	0	28837	1.34991	1.4165	1.35673	1.44438	1.39188	590	0	0	0	10158.5	1357	8051	7366	4346	2457	407	2399	1639	1211	0	3539	955	0	8968	4294	1987	0	0	684	1231	10992	5242	0	5849	3491	1466	584	0	6669	820	795
ACE-MS-098	Post B1	0.08	>25000	47053	73308	36717	0	33271	1.46664	1.4259	1.40921	1.66647	1.49205	337	0	0	0	9778	1427.5	8857	6176	5579	1514	0	1569	382	454	0	3433	589	0	8407	4621	1029	0	0	282	1220	11612	6020	0	6289	2745	802	214.5	0	6929.5	523	366
ACE-MS-099	Pre V	0.09	0.4	47341.5	73664.5	38819.5	0	30148	1.47563	1.43283	1.48991	1.51004	1.4771	27.5	0	2.5	0	253	50.5	243.5	1202.5	1535.5	156.5	97.5	4087.5	69.5	77.5	0	173.5	2086.5	2.5	189	101.5	174.5	367.5	98	35	81	366.5	198.5	0	130.5	2495.5	218.5	169	428	312	15.5	169.5
ACE-MS-099	Post V1	0.09	179	44309.5	70081.5	36603	0	27196.5	1.38112	1.36314	1.40484	1.36221	1.37783	0	0	0	0	194.5	47.5	141	1082.5	1136	93.5	57.5	3696.5	56	41.5	0	74	1375.5	29.5	174.5	83	158.5	298.5	47	0	58.5	440.5	104.5	0	99.5	2252	194.5	72.5	295	228.5	0	158.5
ACE-MS-099	Post B1	0.09	697	43841.5	68948.5	35412	0	27246	1.36653	1.3411	1.35912	1.36469	1.35786	39	0	52.5	0	203	61.5	162	945.5	1362.5	149.5	156.5	1849.5	75	76	0	133	1460.5	0	181	94.5	201.5	342.5	62.5	49.5	80.5	422	127.5	0	164	1920.5	217.5	131.5	375.5	265.5	40.5	132.5
ACE-MS-105	Pre V	0.1	0.4	41195.5	66635	34442.5	0	25047.5	1.28406	1.2961	1.32192	1.25457	1.28916	669	0	0	0	8218	606.5	6712.5	4937.5	3608.5	1633.5	230.5	3390.5	1046.5	507	0	2672	2742.5	0	5794	3737.5	1334.5	0	0	160.5	961.5	0	4246	0	4833	1985.5	1419.5	496	95	5395.5	611.5	0
ACE-MS-105	Post V1	0.09	0.55	42521.5	67283.5	33965	0	25661.5	1.32539	1.30872	1.30359	1.28532	1.30576	442	0	0	0	8001.5	242.5	6119.5	4747	5858.5	1660.5	317	3653.5	1772.5	383.5	0	3435.5	2649	0	6543.5	3790.5	1189.5	0	0	0	1024.5	0	3929.5	0	5035.5	1565.5	1394	452	0	5656.5	715.5	0
ACE-MS-105	Post B1	0.11	29.5	41096.5	66616	34114	0	25362	1.28097	1.29573	1.30931	1.27032	1.28908	716	0	0	0	7934	611.5	6410	5198	4496	1359	265	3932	1986.5	918.5	0	2685.5	2792	0	5919.5	3309.5	1464	0	0	433	977.5	0	4472	0	4811	1732.5	1372	269	274.5	5491	948	78.5
ACE-MS-109	Pre V	0.08	0.4	47869	75226.5	38233	0	28747	1.49207	1.46322	1.4674	1.43987	1.46564	183.5	706	0	0	2848.5	261	1679	3917	4206	2356	576	814	387.5	238.5	0	758	872.5	9	1221	1034	370	2594.5	41.5	149	278	20	989.5	0	996.5	2701.5	347	14756.5	314	1317	214	6201.5
ACE-MS-109	Post B1	0.08	1.75	49722	77814.5	40695	0	30634	1.54983	1.51355	1.56189	1.53439	1.53991	109.5	881	0	0	2216.5	256.5	1488	3824	5482	2710.5	654	725	306.5	202	0	739.5	726.5	0	1122	720	329.5	554.5	2	65.5	182	0	902	0	901	2623	149	13045	266	1235	121	6243.5
ACE-MS-115	Pre V	0.09	0.4	45886	68936.5	36308	0	27074	1.43026	1.34087	1.39351	1.35607	1.38018	221	0	0	0	2526	204	1779	1985.5	2535.5	1167	0	601.5	0	0	0	692.5	266	0	543	892	196	4557	1106	0	0	0	788.5	0	1030	2627	0	0	31	1419	0	36
ACE-MS-115	Post V1	0.08	4946	40224	64779	33527.5	0	24420	1.25378	1.26	1.2868	1.22314	1.25593	143	0	0	0	2498	37.5	1731	1760	2198	3486	0	435	0	0	0	686	387	0	509	782	192	3768	809	0	0	0	897.5	0	751	2260	0	0	75.5	1489	0	45.5
ACE-MS-116	Pre V	220	13.5	41321	65818.5	34981	0	25552.5	1.28797	1.28022	1.34258	1.27986	1.29766	0	0	0	0	2759.5	408	1976.5	3600.5	4254.5	586.5	416.5	1798	2723	472.5	0	1881.5	1091.5	967	3284.5	848.5	1032	0	0	0	1328	1162	1805	598	2265.5	1982	1035.5	6599	140.5	1985.5	638.5	409.5
ACE-MS-116	Post V1	31.3	2070	44562.5	66958.5	36224.5	0	27128.5	1.38901	1.3024	1.39031	1.3588	1.36013	268.5	0	0	0	2641	869.5	3435.5	3019.5	3717	974.5	653.5	2216.5	3848.5	909.5	0	1801.5	1288.5	1586.5	4127	1383.5	1440.5	97.5	39.5	293.5	1552	1775.5	2424	1247	2581.5	2299.5	1126	6726.5	382.5	2216.5	1016.5	1094.5
ACE-MS-116	Post B1	105	1546	44550	66877	37315	0	27851	1.38862	1.30081	1.43216	1.39499	1.37915	349.5	0	0	0	3488	814	4126	3761	3663	1375.5	1133	2378	3915	1131.5	0	2210	1991	1854	3873	1362	2104	407.5	20	615	1943	2311	2400	2457	2768	2583	1200.5	9120	381	2715	1336	713
ACE-MS-117	Pre V	0.09	0.4	38160	60188	28960.5	0	22598.5	1.18944	1.17071	1.11151	1.13191	1.15089	46	0	508.5	0	4367.5	400	3395.5	3327	3192	983	30.5	1259.5	2591.5	45	0	1724.5	2264.5	0	2889.5	2134.5	893.5	2007	0	0	323.5	1118.5	2399.5	0	2360.5	1180	490.5	2689.5	525	3009.5	255.5	0
ACE-MS-117	Post V1	0.09	17587	33558	55092	27827	0	20270	1.046	1.07158	1.06801	1.01528	1.05022	94	0	337.5	0	4492	127	3391	2821.5	2311	993	34.5	1039	2322	455	0	1498.5	2052.5	0	2953	1707	491	1735	0	0	336	911	2726	0	2455.5	803.5	493	1993	361	2595	235	0
ACE-MS-127	Pre V	0.1	0.4	28744.5	49544	22462	0	24484	0.895963	0.963671	0.862099	1.22635	0.98702	0	0	5446.5	22462	1666.5	290	1469.5	2465.5	3304	1005	438.5	748	3687.5	245	0	1059.5	562	0	2212	542	1006	24	329	44	354	486	1181	0	1109	10802.5	343	219.5	1913	1319	0	0
ACE-MS-127	Post V1	0.08	1577	30594	51060	26459	0	27343.5	0.953611	0.993158	1.01551	1.36957	1.08296	0	0	3441	15180	1732	475	1610	2272.5	2400	1196	366.5	695.5	3735	334	0	1177.5	679	0	1801.5	771	1249	97	521	77	532	465	1533.5	0	1147	11736	474	344	1834	1146.5	0	19
ACE-MS-127	Post B1	0.08	15840	36248.5	56588.5	29817.5	0	31011.5	1.12986	1.10069	1.14441	1.55329	1.23206	30.5	0	0	1011	1933.5	375.5	1812	3339.5	3657.5	1179	493.5	530	4346.5	457.5	0	1126.5	524.5	0	1766	833	806.5	0	781.5	74.5	418.5	344.5	1465	0	1204.5	13102.5	658.5	441.5	2305.5	1523.5	0	0
ACE-MS-130	Pre V	0.09	0.4	38910.5	59090	35040.5	0	19685.5	1.21284	1.14935	1.34487	0.986001	1.17326	44	0	0	0	649.5	426	580.5	1203	1687	582.5	801.5	272	657	303.5	0	556.5	669	0	645	185	349	130	0	71	104	635.5	385	0	366	1538	345	0	276	367	0	8.5
ACE-MS-130	Post V1	0.08	13729	35966	54825	32819	0	16832	1.12106	1.06639	1.2596	0.843075	1.07253	79.5	0	0	0	662.5	652	642	1240	2463	587	1333	155.5	649	547	0	639	920	0	681.5	127	477	193	0	65	184	1238	460.5	0	321.5	1391	456	31	255	323	0	154
ACE-MS-132	Pre V	0.08	0.4	32202	54828	24507	0	29216	1.00373	1.06645	0.940587	1.46336	1.11853	0	995	0	0	6100.5	1295	5043	6143	5078.5	2032	185.5	1630	7551	504	0	2408	2232.5	0	4501	2305	1248	0	0	217	246	1881.5	3202	0	3074.5	10163	875	38152	3959	4092	569	247
ACE-MS-132	Post V1	0.08	180	38492	62404	28362	0	32956	1.19979	1.21381	1.08854	1.65069	1.28821	0	1173	0	0	6005	1554	5114.5	6806.5	6246.5	2591.5	550.5	2023	9073	1069	0	2714	3138	0	5640	2780.5	1447	0	0	245	488	2448.5	3834	0	3332	12091.5	1344	42236	4621	4455.5	761	263
ACE-MS-133	Pre V	0.08	0.4	39439	63259	33443.5	0	25404	1.22931	1.23044	1.28357	1.27243	1.25394	350	4139.5	3039.5	8892	7297	676	6041.5	5581.5	6576.5	3268	353	2102	1249	552	0	3192	1984	0	6325	3472	2719.5	0	0	1441	668	0	4105	0	4544	2193	1263	862.5	474	5444.5	930.5	63.5
ACE-MS-133	Post V1	0.08	2339	40187	62663	31791.5	0	23591.5	1.25262	1.21885	1.22017	1.18164	1.21832	570.5	4339	3692	8189	7154	584	6829	5245	7081	3224	485	2112	1309.5	824	0	2983	1761.5	0	6972	3228	2152.5	0	0	1137.5	766	54	4487	0	3976	2260	1793	779.5	461	4610	1032	21
ACE-MS-134	Pre V	224	333	34136.5	57577	27027	0	24029.5	1.06403	1.11992	1.03731	1.20358	1.10621	3	130	0	1030	1073	160	960	3820	2692	1330.5	169.5	634	156	211.5	0	536	363	0	1008	325	383.5	51	0	116	584	872.5	478.5	335	530	5160	399	121.5	353	606.5	0	150
ACE-MS-134	Post V1	166	>25000	34467	56312	26232.5	0	23028	1.07433	1.09531	1.00681	1.15342	1.08247	0	92.5	0	1012	995	135	1038	2889	2589	1188.5	199.5	667	84.5	182	0	511.5	316.5	0	1090.5	289	471	9	0	75	582	934.5	465	318	487	5031	366.5	25.5	233	534	0	226.5
ACE-P-001	Pre V	0.11	0.4	30336	51009	24616	0	24019	0.94557	0.992166	0.944771	1.20306	1.02139	40.5	0	0	0	1764	396	1536	1526	2556	948	165	1350.5	210	460	0	1231	934	0	1452	315	925	216	0	64	20367	1239	865	0	1187	8600	403	528	161	1091	0	107
ACE-P-001	Post V1	0.1	28.2	34922	55848	28077	0	27181.5	1.08851	1.08629	1.07761	1.36146	1.15347	0	0	0	0	1755	357.5	1612.5	1482	2867	1199	145.5	1102	464	482	0	1192.5	999	0	1638	356	969.5	460.5	0	0	22507.5	1405	930	0	991	8578	465	641	226	1142	0	0
ACE-P-001	Post B1	0.12	8982	33727	56031	27375.5	0	25561	1.05127	1.08985	1.05068	1.28029	1.11802	0	0	0	0	1372	521.5	1695.5	1742	2196	1117.5	160	1376	299	493.5	0	1150	823	0	1497	318	682	375	0	0	25515.5	1100	605.5	0	854	8734	687	546	167	973	0	0
ACE-P-002	Pre V	0.09	0.8	35296.5	53489	29324	0	25603	1.10019	1.0404	1.12547	1.28239	1.13711	39	1957.5	0	351	1825	549	37	4842.5	7076	7872	1165	863.5	334	317	0	357	3443	67	263	27	555.5	651.5	0	87.5	823	2967	192	165	22.5	3475	292	49.5	286	0	0	223.5
ACE-P-002	Post V1	0.07	2265	32888.5	51666	27525	0	20703	1.02513	1.00495	1.05642	1.03696	1.03086	41.5	2891.5	0	228	983.5	244.5	9	4146.5	4411.5	5026.5	488.5	840	197	157	0	309	2191	252	161	20	168	178	16.5	39	331.5	2928.5	77	366	29	3134	210	35.5	248	0	0	183.5
ACE-P-002	Post B1	0.08	>25000	45515.5	65958.5	36799	0	30378.5	1.41871	1.28295	1.41236	1.52159	1.4089	12.5	926.5	0	242	1731	341.5	30.5	7291.5	7430	4076.5	227.5	765	216.5	27.5	0	150.5	1848.5	28.5	128.5	49.5	125.5	146.5	0	46.5	139	1728.5	89.5	92.5	44	3690.5	114.5	24	251.5	53	0	147.5
ACE-P-003	Pre V	0.09	0.8	48510	70262.5	38449	0	33912.5	1.51205	1.36666	1.47569	1.6986	1.51325	182.5	0	0	2627.5	9169	0	9578.5	10792	6595.5	1456	0	1219	1071	0	0	2375	10425	0	5854	4865.5	990	0	0	196.5	873	0	5072	0	5070	1112	604	162.5	184	6601	1003	0
ACE-P-003	Post V1	0.07	2.99	38901	60515.5	32262	0	24854.5	1.21254	1.17708	1.23823	1.2449	1.21819	362	0	0	1687.5	6697	384.5	6153	7404.5	3784	1476	143	2059.5	1111.5	467.5	0	2419	7110.5	0	5643.5	3534.5	1058	0	0	356	1244	33	4214	0	4489	1404.5	1038	641.5	441	5096	680	0
ACE-P-004	Pre V	0.09	0.8	41134	66068	33301	0	31946	1.28214	1.28508	1.2781	1.6001	1.36136	0	0	650	0	8128	0	5563.5	4230	2460	1424	0	208	864	3	0	1838	0	0	5091	4153.5	478	0	0	453	1157	0	4174	0	4546	2554	0	0	0	5432	322	0
ACE-P-004	Post V1	0.08	0.4	48300	47910	36780.5	0	35609.5	1.50551	0.931888	1.41165	1.7836	1.40816	131	0	0	0	7468.5	216	6350	4674.5	2064	1321.5	0	901	869	255	0	2681	0	0	5578	3996	977	0	105	517	1023.5	0	4268	0	5135	3622	850	437.5	0	5450	565.5	0
ACE-P-004	Post B1	0.08	0.4	47056	78295	39085	0	38511	1.46673	1.5229	1.5001	1.92893	1.60466	425	0	0	0	7256	55	5330	4217	2356.5	1139	0	694	663	0	0	2517	0	0	6498	4444	846	0	0	350	1178.5	0	4111	0	4940.5	3630.5	1023.5	293.5	0	5937	390	0
ACE-P-008	Pre V	0.12	0.8	34894	54591	28761	0	20917.5	1.08764	1.06184	1.10386	1.04771	1.07526	0	0	0	493	533	274	419	1120	2378.5	593	274	265	1207	292	220.5	398	1658	0	159	0	546	609.5	4	34	54	928	166	0	265.5	1560	134.5	101	733.5	272	0	0
ACE-P-008	Post V1	0.15	6712	35097	52887.5	28252	0	19822	1.09397	1.0287	1.08432	0.992837	1.04996	0	0	0	297	326	124.5	393.5	981	2275.5	377	329.5	238	1181	128	104.5	323	1154	0	128	0	277	182	97.5	119	32	1022	105	0	168.5	1629	60	30.5	798	202	0	69
ACE-P-008	Post B1	0.14	>25000	28819	46954.5	23996	0	15479	0.898285	0.913303	0.920975	0.775307	0.876967	0	0	0	223	304	5.5	170	621	2095	343	335	194.5	738	122.5	0	162.5	865	0	117	0	201	261	0	7	0	792	0	0	97	1273	124	0	511	105	0	5.5
ACE-P-010	Pre V	0.44	0.8	47581	71504	37439.5	0	30101	1.48309	1.39081	1.43694	1.50769	1.45463	0	0	0	0	4050	620	4760	4590	5204	6883.5	0	0	213	272	0	2293	1083	0	2030	90.5	1440.5	0	0	0	1448	0	1549	0	2710	1891.5	438.5	0	0	3360	0	0
ACE-P-010	Post V1	0.73	102	39682.5	50800	30253	0	23891	1.2369	0.988101	1.16112	1.19664	1.14569	0	0	0	0	3452	620	3385	3950.5	4580	4757.5	334.5	388	338	322	505	1825	1691	0	2258	716.5	1485	0	27	366	1217.5	160	1111.5	0	2347	2211	803	0	33	2864	0	71
ACE-P-010	Post B1	0.86	7530	25961	45152	19931	0	13740.5	0.809201	0.878243	0.764959	0.688229	0.785158	0	0	0	0	2731	425	2651.5	2825	2886.5	2741.5	0	313	23.5	146.5	0	998	1216	0	2174	485.5	1012	0	0	0	282	48	1122	0	1985	841	0	0	0	2078	0	0
ACE-P-014	Pre V	0.08	0.8	34487	53576	27803	0	22359	1.07496	1.0421	1.06709	1.11991	1.07601	405.5	112.5	0	399	4993.5	680	3994	13592	7773	1622	4178	901	1227	327	0	1872	1799	0	3679	2651	898	0	0	422	548.5	0	3021	0	2768	658	1015	552.5	475	3495	712.5	0
ACE-P-014	Post V1	0.07	0.4	26697	42225	20908	0	14689	0.832142	0.82131	0.802456	0.735738	0.797912	0	246	0	212.5	3578	316	2756	7315	4907	856	2665	1299	629	368	0	1379	1518	0	3124	1444	627	0	0	114.5	416	0	1929.5	0	2097	445	862.5	217	257	2290.5	363	0
ACE-P-014	Post B1	0.07	31.9	27111	43259	23952.5	0	15626	0.845047	0.841422	0.919305	0.78267	0.847111	27	238.5	0	260	3362	182	2903.5	8034.5	6100.5	931	3222	1183.5	716	366	0	1368.5	1398.5	0	3237	1516.5	787	0	0	82	316.5	0	2031	0	1951	486	938	218	539	2316	390	0
ACE-P-016	Pre V	0.08	0.4	29940.5	49085.5	23715.5	0	17318	0.933242	0.954753	0.910209	0.867418	0.916405	0	0	0	0	5511	576.5	6220.5	3551	3912	1732.5	489	8151	1717.5	1005.5	0	2465	1561	0	5286	2443.5	996	0	0	0	234.5	0	3138	0	3738	648	1499	695	255	4151.5	203.5	0
ACE-P-016	Post V1	0.07	850	38214	59530	30496	0	24741.5	1.19113	1.15791	1.17045	1.23924	1.18968	304.5	0	0	0	8008	515	7692.5	4826	6195	3295	758.5	12013	3280	1094	0	3581.5	2929	0	6978	3709	2273	175	0	175.5	830	253	4337.5	0	5164	1557.5	2254	1056	714.5	5616.5	948.5	242.5
ACE-P-018	Pre V	0.08	0.8	33125.5	52580.5	26647.5	0	19802.5	1.03252	1.02273	1.02274	0.991861	1.01746	175	0	0	0	7758.5	0	6561	8003.5	4065	1576	0	1307	1688	107	0	2401	1291	0	6616.5	3917	1562	0	0	197.5	4563	0	3844	0	5533	741.5	864.5	410	0	5025.5	583.5	0
ACE-P-018	Post V1	0.07	2311	26738	45619	21684	0	14816	0.83342	0.887326	0.832239	0.742099	0.823771	54.5	0	0	0	4294	0	4091	5118	1944	1037	112	2916	1233	712	0	1833.5	1064	0	5545	2585	819	0	0	150	2559	0	2617	0	3670	1298	1221	149	0	3155	477	0
ACE-P-018	Post B1	0.09	20269	39553	63774.5	31341	0	23106	1.23286	1.24047	1.20288	1.15733	1.20838	0	0	0	0	5957	0	5529.5	6069	3742	844	0	3253	703	248	0	1999	1029	0	6232.5	3126	729	0	0	0	3584	0	3265	0	4547	1244	430	173	0	4432	367	0
ACE-P-020	Pre V	0.08	0.8	40083	61078	29655	0	29471	1.24938	1.18802	1.13817	1.47613	1.26293	95	0	0	0	15804	0	14518	9280	3335	2602	0	0	643	0	0	1862	0	0	10865	10429	150	0	0	1258	2098	0	8430	0	11485	0	0	0	0	12703	0	0
ACE-P-020	Post V1	0.09	7636	32590	51058	25217	0	22874	1.01583	0.993119	0.967837	1.1457	1.03062	858	0	0	0	10397	0	9481.5	6447.5	4638	1180	0	1245	1429.5	0	0	2959	850	0	9347	5650	948.5	0	0	726	1102.5	1087.5	6418	0	8015.5	320	0	102	0	8570.5	0	0
ACE-P-021	Pre V	0.08	0.8	24568	43771	20571	0	17861	0.765782	0.851381	0.789522	0.894616	0.825325	256	0	0	1182.5	8068	695.5	8149	7266	4088	1271	905	1294.5	1181.5	86	0	2078	670.5	0	6776.5	4276	1429	0	736.5	299.5	2193	0	4241	0	5220	556.5	675.5	228	0	5156.5	742	0
ACE-P-021	Post V1	0.08	0.4	32248.5	55575	26012	0	23853	1.00518	1.08098	0.99835	1.19474	1.06981	356	0	0	2321	9001	1230	9014	7679	4225.5	1115.5	604.5	1855	1879	477.5	0	2772	1026	0	8706	4543.5	1636	0	1059	271	2536	0	4795	0	6144	1384	1462.5	505.5	0	6416	474	0
ACE-P-021	Post B1	0.08	72	25857	47620.5	20367	0	17978	0.80596	0.926257	0.781693	0.900476	0.853596	0	0	0	8023	7066	0	6022	6711	5566	823	249	1582	1284	74.5	0	2044	501	0	8101	3363.5	1081	0	114.5	0	1552	0	3523	0	4706.5	473.5	606.5	0	0	4744.5	64	0
ACE-P-025	Pre V	0.09	0.8	42490	61956.5	32888.5	0	26618	1.32441	1.2051	1.26227	1.33323	1.28125	35	0	0	0	1839	314.5	1723.5	2832	1721.5	640.5	294.5	728	1091	339	0	701	460	0	1542.5	847	822	170	3040.5	95	308	142.5	1041.5	0	1123	3044	430	271	250	1215	233	159
ACE-P-025	Post V1	0.09	114	38137	59844	29133	0	23459	1.18873	1.16401	1.11813	1.17501	1.16147	0	0	0	0	1739	12.5	1702	1957	1503.5	260	58	894	891	239	0	529	329	0	1705	454	470	0	1074	0	110.5	0	962.5	0	1193.5	3461	313	0	0	1213	92.5	7
ACE-P-025	Post B1	0.09	16159	35189.5	54611	26725	0	20409	1.09685	1.06223	1.02571	1.02224	1.05176	18.5	0	0	0	1625	226.5	1333	2338.5	2476.5	451	381	1093	867	393	0	699	459	0	1930	851	840	74	1294	140	303	129	1121	0	1182	3122	519	209	239	1302	259	165
ACE-P-026	Pre V	0.09	0.8	34779	58656	27130	0	25073.5	1.08406	1.14091	1.04126	1.25587	1.13052	0	0	0	0	7132.5	697.5	7467	5187.5	3712	1470	0	1335	23684	628	0	3013	388.5	0	6044	2777	1302.5	0	0	0	82.5	0	3448	0	4754	2687	1198.5	341	12160.5	4980	0	0
ACE-P-026	Post V1	0.08	8416	36342	56314.5	27613	0	22514	1.13278	1.09536	1.0598	1.12767	1.1039	209.5	0	0	0	6081	1011	5363.5	4129	4213.5	1393	85	3314	19941	633	0	3153	883	0	5669	3121	2074.5	0	0	110	248.5	90.5	3539	0	5093.5	3154	1290	141	11722	4473.5	68	182
ACE-P-036	Pre V	0.08	0.8	35501.5	58000	27737.5	0	22948	1.10658	1.12815	1.06457	1.14941	1.11218	206.5	0	0	0	1577.5	564.5	1972.5	1693.5	3015.5	1567.5	1162.5	712.5	665.5	403.5	0	1017.5	1260.5	0	1604.5	640.5	674.5	387	87.5	310.5	888.5	632.5	1188.5	0	1032.5	3054	584.5	324.5	481.5	1209.5	187	104.5
ACE-P-036	Post V1	0.1	2814	33412	39706	26315	0	20113	1.04145	0.772314	1.00998	1.00741	0.957788	35	0	0	0	1162.5	438	1259.5	1417	2368	903	546.5	669	396	307.5	0	869	911	0	1404	411	579	363.5	0	101	672.5	675	841	0	791	2674	525	200	342	784.5	22	33.5
B002	Pre V	0.09	0.4	29264	50926.5	24212	0	23948.5	0.912155	0.990561	0.929265	1.19952	1.00788	119	0	0	15	1883	426	1386	5936	3846	609	922	1084	1045	673	0	788	877.5	0	1761.5	566	1298	543.5	0	210	1979.5	2720	1191	0	1344.5	6161	1381	242	538	1127	174	1110
B002	Post V1	0.09	12700	29998	54106	25200	0	23638	0.935034	1.05241	0.967185	1.18397	1.03465	23	0	0	119.5	1312	417	1180	5064.5	4140	881.5	972.5	1182	1051	826	0	1241	882	0	1979.5	437	972.5	450	0	261	1051.5	2641	1272	0	1095.5	5435	1469	173.5	508.5	1008	41	1019
B027	Pre V	4.96	153	28200.5	48772.5	23838.5	0	18706.5	0.879006	0.948664	0.91493	0.936965	0.919891	0	7686	0	0	3431	0	4105	9046	3993	1355.5	452.5	1300	346	524.5	0	1791	6337	0	3825.5	1695	1901	0	0	0	460	0	2537	0	2940	2480	633.5	98.5	0	2136	703	489
B027	Post V1	2.97	16550	9527	23171	5398	0	4651	0.296955	0.450695	0.207177	0.232958	0.296946	289	2699	0	0	3746	649.5	3097.5	7593	3916	1745	1014.5	1411	820	1035	0	1704	2620.5	0	3821	1964	1847	195.5	161	423.5	854	636.5	2492	0	2451	2169	842.5	326.5	615	1614	1115	269
B051	Pre V	0.37	7930	13759	19693	22322	0	5530	0.428866	0.383045	0.856726	0.276985	0.486406	0	0	50	22999.5	1432	302.5	2588	4138	2220	742	713	696	755.5	383.5	0	1222.5	279	0	1785.5	1428.5	876	218.5	0	203.5	547	450	1259	0	1390	766	1103	307	166	1840.5	201	347
B051	Post V1	0.91	9580	33718.5	52373	28816	0	16429.5	1.051	1.0187	1.10597	0.822915	0.999646	84.5	0	0	53532.5	2942	419	3182	5153.5	2470.5	1176	619	1442.5	468	323	0	1296	681	0	2485	1418	1666	497.5	0	105	541	236	2182	0	1745.5	1067	1387.5	318.5	45	2044	132.5	83
E0216	Pre V	17.3	2.38	27046.5	48844.5	21878.5	0	17008.5	0.843036	0.950065	0.839704	0.851916	0.87118	94.5	6130.5	0	0	5822.5	555.5	4840.5	3845.5	3152	1530.5	2244.5	1411.5	752.5	464.5	0	1906	1346.5	0	4447.5	2484.5	1324.5	0	0	147.5	549.5	1636.5	3461	0	3601.5	1373.5	571.5	704.5	0	4498	472.5	0
E0216	Post V1	18.4	19372	14700	26950	11530.5	0	9267	0.458197	0.524199	0.442545	0.464162	0.472276	0	4113	0	0	3888	0	3587	3003	1624.5	834.5	4551	1106	571	230	0	1352	1115	0	3510	1620	783	0	0	28	287	885.5	2904	0	2542.5	726.5	256	154.5	0	2901.5	456	0
E0428	Pre V	0.09	0.4	18480	33916	15081	0	9708	0.576019	0.659694	0.578814	0.486251	0.575194	0	0	0	0	1671	183	1574.5	1137	1042	461	119	764	421	267	0	798	314	0	1772	723	512	59	0	0	277	43	1007	0	1126	340	319	196	0	1367	332	0
E0428	Post V1	0.09	42.7	34490	55002	28564	0	20719.5	1.07505	1.06983	1.0963	1.03779	1.06974	196	0	0	0	4222	488	3959	2801	2355	1308	405	1845	887.5	427.5	0	2070	1016.5	0	4678	1850	1428.5	309	9	300	757	333.5	2521.5	0	2778	1024	1023	566	143	2691	645	157.5
E1142	Pre V	0.08	0.4	31477	41698	27503	0	16695.5	0.981134	0.81106	1.05557	0.836238	0.921002	370	0	145.5	37	586	824	434.5	1935	2692	1070	2077.5	265	450	446	0	888	395	0	654	281	1217	669	206	371	5836	10610.5	685	0	523	1441	226.5	922.5	0	629	120	1381
E1142	Post V1	0.09	22.8	29315	41995	24882	0	14870	0.913745	0.816837	0.95498	0.744803	0.857591	185	0	2	0	289	540	328	1591	2509	782	1383	165.5	235.5	328	0	569	170.5	0	349	209	1119	622	101	192	4648	10154	673.5	0	494	1088	29	733	0	532	0	1285
E1142	Post B1	0.09	1432	23689	33681	19187	0	10709	0.738383	0.655123	0.736404	0.536389	0.666575	54	0	27	0	126	422	73.5	1235	2976	389	1125.5	66	121	259	0	370	225.5	0	171.5	138	960.5	668	40	152	1863.5	6296	391	0	237.5	731.5	20.5	377.5	0	239	0	915
E1156	Pre V	0.08	0.4	22283	35456.5	16931	0	12590	0.694559	0.689658	0.649818	0.630604	0.666159	143	0	0	0	7029.5	0	6916	3510	2965	118	0	0	805	0	0	803.5	0	0	6110.5	4320	0	0	0	0	1029	0	3325	0	6203	0	0	0	0	5919	0	0
E1156	Post V1	0.08	457.5	9984	23372	9284	0	6772	0.3112	0.454604	0.356323	0.339194	0.36533	0	0	0	0	4251	0	4034	3534	1047.5	384.5	0	882.5	1076	0	0	810	0	0	3315	2743	716	0	0	0	583	0	1926	0	2810	0	0	103.5	83	3356.5	656.5	559.5
E1598	Pre V	0.08	0.4	24594	45037	18828	0	14762	0.766592	0.876006	0.722625	0.739394	0.776154	294	141.5	0	0	2376	109	2045.5	1901.5	1279	860.5	272	966	474.5	264	0	1005	426	0	2292.5	1255	586.5	0	0	200	428	338	1552	0	1797.5	1448	453.5	279.5	162	1925.5	440	262
E1598	Post V1	0.08	235	23463	42988	18697.5	0	14070	0.731339	0.836151	0.717617	0.704733	0.74746	260	278	0	0	2660	287	2055	2094.5	2111	844	447	1237	632	642	0	1050.5	644	0	2528	1051	894	70	0	215	422	546	1659	0	1633	1976	817	551	169.5	1766.5	356	356
E1748	Pre V	0.09	0.4	19076	30113	17123	0	10358.5	0.594597	0.585722	0.657187	0.518833	0.589085	678.5	2622	0	0	7288	1887	6929	4004	3427	2749	1944.5	1526	1579.5	969	0	3194	1153	0	6290	3401	2341	1824	0	1516	2299	2015.5	4484.5	0	4900	1060	1615	843.5	78	4814	1300.5	783.5
E1748	Post V1	0.1	1346	23901	34536	19065.5	0	13725	0.744991	0.671753	0.731741	0.687453	0.708985	441.5	1454	0	0	8372	747	7477.5	4429	3231	1442.5	0	1309	1567.5	1096	0	2334	627	0	7971	4420	1877	824	0	331	2141	0	5190	0	6818	1339	810	121.5	0	6522	896	170
E2103	Pre V	0.09	0.8	28866.5	48666.5	23583	0	15728	0.899765	0.946603	0.905124	0.787779	0.884818	43	0	0	0	2477	419	1806	7189	2831	754	307.5	469	13572.5	757	0	1328	2570.5	0	2042	817	752	33	113	207.5	317.5	899	1655	0	1557	610	407	166	0	1928	84	159
E2103	Post V1	0.09	0.88	26495	43171	21958.5	0	14249	0.825846	0.839711	0.842775	0.713699	0.805508	44.5	0	0	0	1549	221	1732	5922	2514	512.5	103	573	10360	445	0	559.5	2274.5	0	1499	715	817	0	18	141.5	174.5	222	1136	0	1275	583	209	90	0	1474	78	250
E2143	Pre V	3.17	10.94	21004.5	38588	17490.5	0	11337	0.654708	0.750568	0.671291	0.567844	0.661103	59	0	0	0	2021.5	688	1731.5	1798	2667	1064.5	882	1454	742	543	0	1263	1597	0	2130.5	780	965	33	0	52	467	1489.5	1545	0	1466.5	687	650.5	741	269	1182	234	920
E2143	Post V1	2.96	5.43	27646	44885.5	23190	0	14075.5	0.861723	0.873059	0.89004	0.705009	0.832458	208	0	0	0	2515	815	1853	2438.5	2992	1346	1114	1791	1095	754.5	0	1434	1830	0	3089	1214	1377	158	126.5	237	673	2252	1835	0	1660	927	660.5	809	456	1553	319	1220
E3329	Pre V	0.08	0.4	20283.5	35961	13272	0	12128	0.632234	0.69947	0.509384	0.607463	0.612138	57.5	2345.5	0	0	820	147	647	1198	1618	360	136	121	263.5	161	0	334.5	443.5	0	420	309	210	162	56.5	79	169	1043	429	0	379.5	854	122	359	224	442.5	99	181.5
E3329	Post V1	0.08	380	20221.5	35312.5	14300.5	0	12269	0.630302	0.686857	0.548858	0.614525	0.620136	87.5	2057	0	0	916.5	217.5	666	1637.5	1556.5	676.5	237	193.5	238	205.5	0	409.5	507.5	0	585	384	259.5	205.5	46.5	112	216.5	765.5	472	0	446	998.5	165	332.5	235	629	144.5	322.5
E3490	Pre V	0.08	0.4	31634.5	50401	25053.5	0	22906	0.986044	0.98034	0.961562	1.14731	1.01881	253	0	0	1366	7135.5	217	5816.5	8799	6986	2280	0	6232	525.5	65.5	0	2047	814	0	4364	3639	980.5	0	0	0	291	0	3124.5	0	3683	2128	556	337	0	4576.5	587	0
E3490	Post V1	0.07	4064	36597.5	54870	29810	0	25790	1.14074	1.06727	1.14412	1.29176	1.16097	627.5	0	0	827	6406	849	4948	9504.5	5970	3043.5	132	8648	1148.5	484	0	2240	1138	0	4310.5	3712	1414	0	186	635	990	50.5	3425	0	3827.5	2454	801	1269	590	4691	964	309
E3549	Pre V	8.41	0.4	27489	50827	22998.5	0	20001	0.856829	0.988626	0.88269	1.0018	0.932487	41	0	650	0	2463	2773	2492	2321	2743.5	2619	716.5	1107	535	594.5	0	1598	2344	0	2820	863	851	351.5	0	69	703	3565	1589	0	1552	3971	1023	1397	162	1745	236.5	170.5
E3557	Pre V	0.69	39.2	31004	52125	26789.5	0	16717	0.966391	1.01387	1.02819	0.837315	0.961443	576.5	0	0	0	8145	2015	6384	10339	4305.5	2737	2716	2398	1910.5	1455	0	3571	2353.5	0	7544	3788	3101	3353	168	862	1388	323.5	5386	0	5103	852	1503	1891	303	5681	2276	3261.5
E3557	Post V1	0.64	>25000	32640	53968	28207	0	17710	1.01739	1.04972	1.08259	0.887052	1.00919	645.5	0	0	0	7051.5	1243	6813	9762	5567	2521	2162	2074.5	1437.5	938	0	3175	2568	0	6237.5	3562	2150	3134.5	387	710	1379	494	4377	0	4521	1543	2085	1673	391	5108	1943	2240
E3588	Pre V	104	1717	43562	52452	37073	0	28011	1.35782	1.02023	1.42287	1.40301	1.30098	386.5	0	6609	71011	7082	994	6653.5	8740	6987	1943	843	1965.5	1154	444.5	0	3133.5	4497.5	0	7668	4191	2336	0	0	216.5	2417.5	0	5162	0	5277	3176	1401.5	5075	282	6142	883.5	1594
E3588	Post V1	99.2	>25000	28057.5	37739.5	24336.5	0	16894.5	0.874549	0.734064	0.934043	0.846206	0.847215	106	0	2936	52521	4683.5	823.5	3620.5	4572	5523.5	1271.5	1084.5	1523	620.5	985.5	0	2192.5	2690	0	4408.5	1967.5	1781.5	0	0	169.5	893	159.5	3042.5	0	3017.5	1943.5	1022.5	2571.5	181.5	2895	805.5	718.5
F001	Pre V	0.1	0.4	18289	26370.5	12152.5	0	8789	0.570066	0.512927	0.466417	0.44022	0.497408	162	51	14.5	0	47	70	72	1234	1116	141.5	250	181.5	28	36	0	63	80	0	9	0	69	303	53	28	80	580.5	5	0	45.5	732	58	19	97.5	0	0	227.5
F001	Post V1	0.08	11.3	39349.5	58601.5	33678	0	20740	1.22652	1.13985	1.29257	1.03882	1.17444	266.5	148	110	0	116	65.5	121.5	2732.5	3237	158.5	169	570.5	90	168	61	140.5	170	0	130.5	38	72.5	420.5	79.5	58	504.5	469.5	22	0	126	1101	69.5	192	237	0	0	305
F001	Post B1	0.08	2699	41355	60791	33802	0	26822	1.28903	1.18243	1.29733	1.34345	1.27806	414	17	28	0	71	33.5	29	2163	2792	39	44	460	16	13	12.5	26	82	0	86	31	40	111	17.5	66.5	210.5	91	6	0	75	1379	551	29.5	169	17	0	120
F004	Pre V	0.09	0.4	31088	57584	26462	0	14092.5	0.969009	1.12006	1.01562	0.70586	0.952636	0	0	0	25371	6649.5	0	4912	6332	4262	1038	0	2238	783	0	0	1855.5	477.5	0	5987.5	2379	1606.5	0	0	0	43	0	3317	0	4636	1036	1025	6	0	3966	130.5	0
F004	Post V1	0.08	55.7	35108.5	58792	28875	0	20632.5	1.09433	1.14355	1.10823	1.03343	1.09489	282	0	0	25534.5	7791	547	7847.5	8235.5	5203	1539	0	3133	1339	666.5	0	2673	1432	0	7297.5	3748	1604	0	0	138	642	0	4285.5	0	5240	1622	1445.5	799	272	5235.5	1225	574
F012	Post V1	0.07	752	30674	51051	25221	0	17162	0.956105	0.992983	0.967991	0.859604	0.944171	0	0	0	0	4189.5	0	4358	3975.5	4051.5	1002.5	1387	2824.5	1658	1393	0	4165.5	1302	0	4842.5	2004.5	1204	299	0	0	777	1968.5	2987	0	3718.5	2268.5	835	295	501.5	2942	427	515
F012	Post B1	0.09	>25000	25953.5	44276	19950	0	16391	0.808968	0.861204	0.765688	0.820987	0.814212	0	0	0	0	3236	232	3469	3541	5060.5	596	600	1779.5	1014.5	751	0	2607	922	0	3735	1805.5	940.5	0	0	20.5	616	711	2109	0	2864	1498.5	1001.5	194	173	2645.5	65	383.5
F012	Pre V	0.1	0.4	30625	53814	25688	0	19190	0.954578	1.04673	0.985914	0.961182	0.9871	0	0	0	0	5736	363	4584	6467.5	2218	795	895	2963	1738	568.5	0	3559.5	1317.5	0	6718	1919	1017	160.5	0	0	1109.5	2455	2885	0	3862.5	2371	1048.5	0	569	3736	0	629
F071	Pre V	0.1	0.4	40615	61692	33107	0	24428	1.26596	1.19996	1.27066	1.22354	1.24003	204.5	0	25232	71657	1436	274.5	1138	2257.5	2398	696	421	1838	409.5	182	0	586	354	0	938	758.5	911	772	16	114.5	99.5	3606	1033.5	0	756	1976	228.5	3357	296	1064	67	1022
F071	Post V1	0.07	703	40196	61043	33698	0	25823	1.2529	1.18734	1.29334	1.29341	1.25675	37.5	0	22379	71169	1483	331	1342	2201	1917.5	707	355.5	1460.5	350	94	0	510	414.5	0	865	754	868.5	757.5	0	110	81.5	3860	1014	0	710	1839	146.5	3926	225.5	978	0	1110
F072	Post V1	0.09	522	23082	40302	18376	0	9726	0.719463	0.783906	0.705277	0.487153	0.67395	0	6007	0	0	3463	288	2525	2409	2050.5	1290	205	2318.5	871	302	0	1988	702	0	4735.5	1650	1016	0	0	412.5	592	2075	2958	0	3122	732.5	1096	407.5	185	2740	947	225
F072	Post B1	0.07	9280	27469	48385	21660	0	17251	0.856206	0.941127	0.831318	0.864062	0.873178	66	2767	0	0	3663.5	521	3831	2956	1718	1031	28.5	2301	1175	342	0	1782.5	809	0	4580	2026.5	1102	0	0	217	678	1517	2657	0	3123	813	878	385	174	2868.5	529	701
F072	Pre V	0.1	0.4	23292	44059.5	18597.5	0	15727.5	0.726009	0.856993	0.713779	0.787754	0.771133	264.5	13893	0	0	5215	106	4733	3541	4276.5	1425	246.5	2835	1320	1230	0	2476.5	1196.5	0	5639	2882	1691	0	0	300	1080	2323	3210	0	3955.5	847	1379	588	219	3504	669.5	979
F090	Post V1	52.8	17150	22910.5	35056.5	18984.5	0	12417.5	0.714118	0.681877	0.728632	0.621963	0.686647	0	0	0	0	6764.5	834.5	5949.5	3495.5	3869.5	615.5	0	2023.5	1161.5	0	0	2277.5	9579.5	0	6387.5	2890	722	0	0	0	546.5	0	3475	0	5015.5	0	476.5	8719.5	0	4615.5	0	723.5
F090	Pre V	74.9	161	25673	38944	21173	0	14721	0.800224	0.757492	0.812627	0.73734	0.776921	6.5	0	0	0	5832	0	5677.5	4080.5	1427	0	0	1370	1173	0	0	1973	9401	0	6233	3284.5	995	0	0	107	538	0	3753	0	4338	0	110	11341.5	0	4457	0	0
F092	Pre V	0.1	0.4	24183	43859	19292	0	14317	0.753781	0.853093	0.740434	0.717105	0.766103	243.5	0	0	0	6134	1302	6653.5	4514	4964	2018.5	767	2862.5	1412	873.5	0	2681	1172	0	5992.5	2508	1543	0	0	0	1198	1075.5	3481	0	3733.5	871	1234.5	636	191	4156	659	734.5
F092	Post V1	0.07	2650	24612	45586	20066	0	14419	0.767153	0.886684	0.77014	0.722214	0.786548	0	0	0	0	4925.5	1301	6218	4276	4211	1538	950	2963	1397.5	940.5	0	2404	1318	0	5446	2483.5	1823	0	0	65	1098.5	1242	3786	0	3322	847	1295.5	471.5	356	3840	581	485
F097	Post V1	0.07	30.7	25368	45435	20833.5	0	16299	0.790718	0.883747	0.799597	0.816379	0.82261	0	1147	0	0	6957	1442	6844	5100	7267	2852.5	644	2881	1400	1046	0	3188.5	2096.5	0	6813	2700.5	2175	0	0	0	794	39627	4149	26	4290	2088	1597	550.5	272	4426	204	8018
F097	Pre V	0.1	0.4	25953	44045	21430	0	16333	0.808952	0.856711	0.822491	0.818082	0.826559	443	1831	0	0	7657	1773	6591.5	5463	5842	2240.5	1383.5	3175.5	2359	1409	0	3187	2421.5	0	7780.5	2930	2846	28.5	6	417	1521.5	39821	4977	0	5350	1916	2317.5	925.5	390	4947	753	8300
F104	Pre V	36.4	4360	14517.5	25171.5	11886.5	0	8354	0.452509	0.489606	0.456208	0.418432	0.454189	0	0	0	0	3566	20.5	3416	3559	2236.5	882.5	159.5	2170.5	578.5	362.5	0	1978	5533.5	0	5063.5	1888.5	1380.5	0	3984.5	0	1142.5	262	2700.5	0	3081.5	1438.5	938.5	965	0	3106.5	0	2259.5
F104	Post V1	20.3	24710	9001.5	17332.5	7676.5	0	5230	0.280576	0.337131	0.294627	0.261958	0.293573	0	0	0	0	2175	44.5	2195.5	2397.5	1957.5	465.5	179.5	1377.5	551.5	192	0	1278.5	3064.5	0	2867.5	997.5	925.5	0	1019.5	0	653.5	347.5	1617.5	0	1700.5	521.5	725.5	661.5	0	1590.5	0	706.5
F120	Post V1	0.07	3.25	35007	61342	27522	0	21048	1.09116	1.19315	1.0563	1.05424	1.09872	0	0	0	0	6768.5	0	4823.5	4821	2588.5	785	0	1587	448	0	0	2314.5	0	0	7649	3927.5	1345	0	0	990.5	1212	5447	4966	0	5811	0	326	0	0	5072.5	0	280
F120	Pre V	0.09	0.4	27757	54046	23773	0	16965.5	0.865182	1.05124	0.912416	0.849762	0.91965	384	0	0	0	6610	0	6437	4080.5	3982	458.5	0	2044	1253	16	0	2419.5	563	0	7682	4321	1606.5	0	0	729	902	8629	4162	0	5459	0	502.5	98	0	4821	0	622
F124	Pre V	5.25	117	29956	46912	27407	0	16122.5	0.933725	0.912476	1.05189	0.807538	0.926407	209	1212	1096	0	6168.5	769	5543.5	4139	6081.5	1533	1557	2934	1367	792.5	0	2286	5817	0	6757	2787	2566	529.5	0	42.5	735	386	4017.5	0	4828.5	1307	873.5	354	306	4593	960	2610.5
F124	Post V1	5.57	18400	27358	46070	23500	0	14183	0.852746	0.896099	0.901938	0.710393	0.840294	115	1105.5	217	0	4986	310	5797.5	3892	5300.5	1111	1233	2670	847	1115	0	2239.5	4610	0	6118.5	2489.5	2474	118	0	0	646	247	3245	0	3960	900	1213	504	399	3637	831	2581.5
F124	Post B1	3.05	16599	26399.5	40221.5	22530.5	0	13865	0.822869	0.782341	0.864728	0.694465	0.791101	15	199.5	0	0	4422	179	3541	3756.5	3681.5	1166	873	2142	709	617.5	0	2072.5	3060	0	5483	1703	1615.5	0	0	35	573.5	138	2792	0	3323.5	863	758	518	220	2882	933	1880
F134	Pre V	0.1	0.4	30311.5	49597.5	23251	0	19463	0.944806	0.964711	0.892382	0.974856	0.944189	0	0	0	0	9177	0	8488	3358	2952.5	1548	0	6	0	0	0	3580	0	0	8242.5	4008	720.5	0	0	0	1148	0	4455.5	0	6286	0	643	0	0	5093	0	0
F134	Post V1	0.08	8330	26098	44340	22907	0	17109.5	0.813472	0.862449	0.879179	0.856975	0.853018	320.5	0	0	0	7025.5	0	6224.5	4573	3643	935.5	0	655.5	2070.5	629.5	0	2866.5	310.5	0	8416.5	3498	2262	0	0	0	470	0	4064	0	5365.5	0	964	0	0	4997	0	0
F139	Post V1	115	89920	15146.5	29890.5	13093	0	10187	0.472115	0.581394	0.502514	0.510243	0.516566	242	0	0	0	2576	724	3650	3084	4314	852	619	1748	2048	555.5	0	1701	3788	0	4426	1545.5	1506	0	153	127	557.5	776	2153	0	2985.5	1239	1185	264	485	2524.5	299	460
F139	Post B1	258	>25000	17607	32944	16137	0	11168.5	0.548808	0.640787	0.619344	0.559404	0.592086	0	0	0	0	3152.5	636.5	4086.5	3261.5	3794.5	768.5	447.5	1223	1529.5	209.5	0	1911.5	3721	0	5438.5	1473.5	1201.5	0	0	0	248	721.5	2221.5	0	2500.5	771.5	504.5	0	0	2234.5	0	0
F139	Pre V	181	404	21167	40338	18205	0	13275.5	0.659773	0.784607	0.698714	0.664939	0.702008	0	0	0	0	5197	1137	4206.5	4902	6553.5	827	501	2271.5	1925.5	770	0	2598.5	5675	0	7273	2335	1615	0	0	0	511	827.5	3082	0	3800	1703.5	1533.5	238	446.5	3416.5	241	348
F150	Pre V	0.09	0.4	30275.5	49757	27956.5	0	18979.5	0.943684	0.967814	1.07298	0.950639	0.983779	0	0	0	0	29828	26027.5	39987.5	12460.5	8836.5	26384	0	2693.5	2858	293.5	0	3015.5	1213	0	8043.5	4036	1418.5	0	0	265.5	901	0	4580.5	0	5653	784.5	1540.5	515.5	538.5	5218	178.5	359.5
F150	Post V1	0.06	1700	38273	57065.5	31270	0	25714	1.19296	1.10997	1.20015	1.28795	1.19776	317.5	0	0	0	40018	29686	48077	15439.5	9950	30822.5	0	3068	2361	74	0	2781	451	0	6608	3901	1972.5	0	0	287	807.5	0	5243	0	6128	526.5	1886.5	307	465	6213.5	195	518
F158	Pre V	10.1	35.2	44781	72700	35551	0	40843.5	1.39582	1.41407	1.36446	2.04576	1.55503	152	0	0	0	10039	0	8201	5817.5	2312	1254	0	2038	1535	97	0	3510	970.5	0	10093	6202	1250	0	0	0	962	0	5812	0	8221.5	12797	1327.5	1658	28	7120.5	135.5	15
F158	Post V1	5.54	3360	35816	63483	29226	0	34828	1.11638	1.2348	1.1217	1.74445	1.30433	539	0	0	0	7679	0	6510	3955.5	3541	1181.5	0	2346	1525	477	0	2529	1369	0	7869	4499	1210.5	0	77	0	874	0	4257	0	5363	13177	1249	925	590	5504	110	1042
F242	Pre V	1.73	0.4	34416	57215.5	29710	0	19492	1.07274	1.11289	1.14028	0.976309	1.07555	289	0	0	2345	6802	578.5	6823.5	4547	8891.5	1944.5	27643	3067.5	1751	1730	0	3213.5	2870.5	0	9217.5	2923.5	2282	0	131	42	987	479.5	4663	0	4536	1790	2010	682.5	261.5	4631.5	739	495
F242	Post V1	1.35	134	36746	57972.5	30454.5	0	21179	1.14537	1.12761	1.16885	1.06081	1.12566	152	0	0	1696	5998	628	5785	4278	5256.5	1832.5	27929	2645	904	689	0	2817	2482.5	0	7084	3060	1024	0	0	0	626	14	4077	0	4697.5	1171	1727	321	0	4357	0	0
F248	Post V1	0.09	2230	19185	35809	15305	0	10265.5	0.597994	0.696514	0.587411	0.514175	0.599024	312.5	0	0	0	4860	1424	4872	3520	3370	1547	600	2459.5	2040.5	1439	0	3006	2074.5	0	6942.5	2712.5	1852	0	36	471.5	1337	690	3582	0	4458	184	2586.5	624.5	564.5	3644	275	806
F248	Post B1	0.09	>25000	28582	41279	21442	0	16861.5	0.890898	0.80291	0.822951	0.844553	0.840328	212	0	0	0	4494	826	4929	2776	3952	1350	0	1841	841	579.5	0	1981.5	845	0	5693.5	2535	956	0	0	345.5	1036	0	3231	0	3786	110.5	1168	438	245	3253	81	154
F248	Pre V	0.09	0.4	26181	47786.5	21314	0	15183	0.816059	0.929486	0.818039	0.760481	0.831016	767	0	0	0	5968	2765	8712.5	5379	5720.5	2939	2384	1868	3928	3718	0	4981	4375	0	10677	3258	2956	0	0	852.5	2677.5	2461	5840	0	6066	0	4930	150	1024	4707	132.5	1385
F281	Pre V	0.15	1.83	31166.5	54115	25185	0	22912	0.971456	1.05258	0.966609	1.14761	1.03456	84.5	0	0	0	10908	12176	11038.5	5817	6172	9685	127.5	2380	1253	512.5	0	2685	1551	0	5871.5	2693	1628	0	0	208	580	166.5	3627	0	4273.5	1866	1425	766	409	4242.5	792	147
F281	Post V1	0.13	11130	23018.5	43889.5	17852.5	0	16257	0.717484	0.853686	0.685185	0.814275	0.767658	0	0	0	0	8000	7924.5	8690.5	4103.5	4205.5	5887.5	0	1885	532.5	0	0	1694.5	1163.5	0	5711.5	1868.5	991.5	0	0	0	199.5	0	2554.5	0	3366	1244	715.5	329	158	2934.5	141.5	0
F294	Pre V	0.06	0.4	36936.5	61492	29646	0	23241	1.15131	1.19607	1.13782	1.16409	1.16232	64	0	0	0	3029	334	2874	3927	2326	648	260	1925	1069.5	783.5	0	1661	954.5	0	4604	1193	1344.5	0	0	64	563	0	2223.5	0	2668	2064	991	203.5	128.5	2060	306	1175
F294	Post V1	0.1	0.4	37119	62100	29519	0	24009	1.15699	1.2079	1.13295	1.20255	1.1751	79	0	0	0	3085	143.5	3399	6527.5	3853	551	230	1705	612	400.5	0	1544	539	0	3841	1271	1071.5	0	0	94	305	0	2075	0	2310	1849	770	377	65.5	2034.5	409	1176
F298	Pre V	0.09	0.4	30413	51467.5	23663.5	0	18198.5	0.94797	1.00108	0.908213	0.91152	0.942197	0	0	0	0	1696.5	73.5	2318	1172.5	1980	623.5	257.5	2210.5	587	187.5	0	1094.5	1063	0	2714.5	794	535	709.5	0	106.5	390	235.5	1286.5	0	1700.5	2401	496.5	135.5	89.5	1229.5	72.5	447.5
F298	Post V1	0.06	567	31089.5	50605.5	25671.5	0	18473	0.969056	0.984318	0.985281	0.925269	0.965981	57.5	0	0	0	2533.5	412.5	2579.5	1988.5	2398	852.5	371.5	2639.5	647.5	607.5	0	1298.5	1350.5	0	3502	846.5	1085.5	766.5	0	71.5	382	374.5	1650.5	0	2032.5	3118.5	810.5	289.5	145.5	1780.5	181.5	779.5
F303	Pre V	0.11	0.4	34599.5	57490	25978	0	20444	1.07846	1.11823	0.997045	1.02399	1.05443	0	0	0	0	6888	89	5567	4339.5	4157	1397	0	1807	1091.5	904	0	2905	1278	0	8333	4254	1697	0	0	0	308.5	0	3614.5	0	4994	750.5	1142	1819	41.5	5426	0	0
F303	Post V1	144	5940	32919	51356	25170.5	0	18420.5	1.02608	0.998916	0.966053	0.92264	0.978422	0	0	0	0	6366.5	0	6121.5	2920.5	5145.5	1334.5	0	1985.5	1564	0	0	2857	913	0	7081.5	3638.5	1567.5	0	0	0	420.5	720.5	4445	0	6312.5	582	908.5	1080	0	4990	0	0
F310	Pre V	0.29	1.15	35434	61264	27972	0	22243.5	1.10447	1.19163	1.07358	1.11412	1.12095	194	0	7758.5	77	11851	12511	14586	11048.5	11946	30360	679	3499.5	1365	1242	2004	3386	2056.5	0	8816.5	3847.5	2120.5	890	0	16	1050	151.5	4579	0	5525	1984.5	1595	779.5	0	5651	738.5	2647
F310	Post V1	14.5	37460	32261	53453	26888	0	20493.5	1.00557	1.0397	1.03197	1.02647	1.02593	96	0	6104	163	10075	10642	12942.5	9485.5	10376.5	27072	1139	3688	1466	1536	1686	3662	2550	0	9844	4239	2799.5	1378	0	117	1031	498	4997	0	5366	1857	2398	616	328	5473	1350	2953.5
F310	Post B1	12.5	>25000	30882.5	49296	24774.5	0	18220	0.962604	0.958847	0.950854	0.912597	0.946225	162.5	0	1818.5	0	8078.5	6494.5	9950.5	7929.5	9166	22261	1063.5	2898.5	1175.5	1221	221.5	2766	1947.5	0	7216	3034	2323.5	418	0	65	906	360.5	4130	0	4764.5	1285.5	2355.5	809.5	147.5	4484.5	682.5	1606.5
F323	Pre V	0.1	0.4	30811.5	38847.5	24451.5	0	16920.5	0.960391	0.755615	0.938457	0.847508	0.875493	119.5	0	0	0	3663.5	306	3581	6131	4589.5	1181	313.5	2180.5	3102.5	472	0	1515	1027.5	0	4194.5	1883.5	1534.5	0	0	92.5	568	201	2361.5	0	2631	1283.5	973.5	837.5	1181.5	2780.5	263.5	948.5
F323	Post V1	0.08	278	15768.5	22650	13204	0	8503.5	0.491502	0.440561	0.506774	0.42592	0.466189	67	0	0	0	1894	143.5	2110	3361.5	5092	614	330	1566	1415	353.5	0	1011	799	0	2512	893	753	26	0	9.5	287.5	251.5	1293	0	1434	628	718	452.5	490	1441	246	438.5
F328	Post V1	0.07	321	22933.5	43712.5	17986	0	21981	0.714835	0.850243	0.690309	1.10098	0.839091	31.5	277	0	1407.5	404	195	549	4533	5641	2665	717.5	818	613.5	150.5	0	392	1492.5	3.5	613	136	630	347	156.5	41	902	5833.5	419.5	279	335	7629	248	214	264.5	268	25.5	1056
F328	Pre V	0.09	0.4	20165	40117	16216	0	20016	0.628541	0.780308	0.622376	1.00255	0.758445	19	80	0	1149.5	310	95	354	3272.5	2886	2250.5	369.5	710	401	86	0	277	1083.5	0	496	132	441	286	76	0	790	1870	278	4	317	6663	115	133	162	186.5	0	1568
F332	Post V1	1.95	22500	21263.5	38093	16511	0	12694	0.662781	0.74094	0.633698	0.635813	0.668308	665.5	1924	0	8748	4568.5	770	4530	5895	8840	1242	756.5	2031	1523	923	0	2218	1843	0	5363.5	2249.5	1764.5	0	75	196.5	795.5	622	3149	0	3068	632	1230	744.5	182	3032	559	736
F332	Pre V	2.17	64.5	20929	39629.5	15911.5	0	12338	0.652354	0.770826	0.610689	0.617981	0.662963	283	2047	0	8883.5	3895.5	774	4538.5	5742	10350	1176.5	545	2239.5	989	764	0	2158	1731	0	5447.5	2166	1716.5	0	0	29.5	623	448	2811	0	3410	432.5	1091	249	50	3061	289	750
F354	Pre V	0.1	0.4	41342.5	68320.5	34672	0	25902	1.28864	1.32889	1.33072	1.29737	1.31141	77.5	0	0	1163.5	1701	140.5	1293.5	3665.5	3522.5	787.5	59	434	11306.5	149.5	0	648.5	224	0	1089.5	891	325.5	0	0	0	82.5	165.5	1037.5	0	858	1255.5	200	60.5	5315.5	1149.5	60.5	223
F354	Post V1	0.06	25.4	44619.5	71161.5	35516	0	27674.5	1.39078	1.38415	1.36312	1.38615	1.38105	146.5	0	0	1224.5	2003.5	116	1485	4329.5	4425.5	915.5	58.5	649.5	14418.5	105.5	0	795.5	254.5	0	1473.5	975	381	10.5	0	50.5	162.5	294	1201.5	0	1037	1567.5	262.5	126	6327.5	1276	69.5	623.5
F355	Post V1	0.08	185	21485.5	34228.5	17444.5	0	12967.5	0.669701	0.665772	0.669526	0.649512	0.663628	349.5	11580	0	0	2786.5	6432.5	3130.5	4723	7915.5	3377.5	3025.5	0	1186.5	2217.5	0	3181.5	383	0	3279.5	1039.5	312.5	3273.5	470.5	1199.5	2672	5810.5	2703.5	0	1249.5	2267.5	279.5	82	1020	2309.5	1176.5	2087.5
F355	Pre V	0.09	0.4	18890	19441	15836	0	11991	0.588799	0.378143	0.607791	0.600601	0.543834	89	8035	0	0	3213	4315	4312	5577	6800	2320.5	1248	1639	790	985	0	2656	109	0	3754	1600.5	348.5	1695	61.5	1144.5	2302	13744	2513	0	1940	1880	23	0	318.5	2946	1312.5	1843.5
F370	Pre V	0.09	0.4	15931	27766.5	13243	0	9327	0.496567	0.540081	0.508271	0.467168	0.503022	25	6713.5	1873	0	2583	401.5	2959	3106.5	2809	1323.5	1904	1233	1744	687	0	1136	2353	0	2725	1034	900	0	0	19	515	516	1495	0	1749	571	853.5	476.5	124	1753.5	225.5	771
F370	Post V1	0.08	2350	23589	40855	20374	0	13013.5	0.735266	0.794663	0.781961	0.651816	0.740926	222	9704	4645.5	663	3088.5	615	2672	2682	2698	1517	2490.5	1444	1785	835	0	1983	2945	0	2908.5	1015	1085	156	0	47.5	778	2533	1719	0	1812	994.5	804	310	597	1912	203.5	629
F371	Pre V	2.43	531	28697.5	51175.5	24553	0	27319.5	0.894498	0.995405	0.942353	1.36837	1.05016	609	1168.5	2435.5	248	5765.5	1101.5	5254.5	6302.5	13477.5	3870.5	661.5	2679.5	8153.5	474.5	0	2390	1422.5	0	4861.5	2586.5	1419.5	0	843	366.5	780.5	1050.5	3628.5	0	4086.5	9363.5	1496.5	846.5	3239.5	4571	446.5	1049
F371	Post V1	2.34	46900	28286.5	50489	25256.5	0	26243.5	0.881687	0.982052	0.969353	1.31448	1.03689	562.5	0	3855.5	0	5824.5	923	4417.5	6528.5	5929	3364.5	487.5	2106.5	9233	1212.5	0	2144	1005	0	4536.5	2667.5	1316	0	293.5	245.5	685	804	3410	0	3077.5	9574.5	1504.5	545.5	2962	3794.5	554.5	728.5
F372	Pre V	0.09	0.4	43728	65724	35784	0	25268	1.363	1.27838	1.3734	1.26561	1.3201	0	0	0	0	3526	444	2806	4696.5	3807	1306.5	80.5	1306	749.5	585	0	1967	4747	0	3343	1684	1616	45	411.5	223	557	614	1963	0	2089.5	1947	1075	334	95.5	2345	47	808
F372	Post V1	0.08	7.28	44330	65545	37763	0	26674	1.38176	1.2749	1.44936	1.33604	1.36051	225	0	0	0	3468	408	3349	4622	4007	1214	394	1530	1273.5	729	0	2074	5036.5	0	3717	1547	1978	123.5	450.5	408	716	798	2189	0	2350	2521	1108	618	497	2692	177.5	835.5
F437	Post V1	0.83	10910	34155	53920.5	27746	0	20258	1.06461	1.0488	1.0649	1.01468	1.04825	52	0	0	0	1442.5	597.5	1546	5144	2189	408.5	363	2160.5	1040.5	674	0	943.5	775.5	0	2149	592	593	48	0	99	830	15577	1264	0	1289	2007.5	479.5	480	145	1294	308	192
F437	Pre V	2.15	45.7	34780	55866	29083	0	20837	1.08409	1.08664	1.11622	1.04368	1.08265	10	0	0	0	1465	455	1481	5086	1653	359	289	3293	513	421	0	838	749.5	0	2208.5	751	641.5	7	3	61.5	894	14485.5	1363	0	1434	1598	471	387.5	173	1433	352	141.5
F440	Pre V	0.1	0.4	40100.5	62015	34566.5	0	23534.5	1.24993	1.20624	1.32667	1.17879	1.24041	84.5	1048	15	304	762	206	470	1051	1865	267	1594.5	1592.5	182.5	188.5	0	194.5	334	0	233	0	401	339	180	42	200	1645	135	0	58	1889	257	430	235	152	847	390
F440	Post V1	0.07	72.6	41856.5	64563.5	36460.5	0	23614	1.30466	1.25581	1.39937	1.18277	1.28565	122.5	1253	10.5	315.5	789	269.5	555.5	1156.5	2155.5	324.5	1886.5	1211	189.5	240.5	13.5	191.5	446.5	0	249.5	6.5	405.5	384.5	174.5	53.5	230	1882.5	104.5	0	56	2385	307.5	404	212.5	149.5	735	441.5
F440	Post B1	0.07	11900	35861	54987	29249	0	21958.5	1.11778	1.06954	1.12259	1.09985	1.10244	30	615.5	0	117	346.5	130	202	689	1221	150	796	829	51	89	0	65	226	0	111.5	0	217	438	73	16	66	648	47.5	0	20	1347	75.5	142	72.5	49	442	191
F442	Pre V	19.1	542	24569	42891	19896.5	0	17646.5	0.765813	0.834265	0.763635	0.883872	0.811896	0	1883	4611	40366	4102	487	4201.5	3661	3178	1424.5	854.5	2759	937	695	0	2133.5	3768	0	6197	1547	1550	0	0	0	1736.5	776.5	2788	0	3458	2986	1129.5	377	0	2827	0	1221
F442	Post V1	10.6	32150	27550.5	42360	21822	0	19618	0.858746	0.823936	0.837536	0.98262	0.875709	0	1412	4128	37297	5195	394	4961	4544	2071	1811	749	3362	856	1020	0	2846	3955	0	6553	2712	1878.5	0	0	0	2668	826	3403	0	4453	3521	1870	837.5	0	3873.5	153	277
F450	Pre V	0.1	0.4	34288.5	56261.5	29168	0	20168	1.06877	1.09433	1.11948	1.01017	1.07319	229	11130.5	0	0	9344	0	6439	1191	2543.5	2076.5	0	2844	1091.5	467	0	2148.5	1008.5	0	7894	4042.5	1557	0	0	596	1921	0	6114	0	6201	1105	2008	251.5	186	6151.5	328	334
F450	Post V1	0.1	279	17509.5	29346	14019.5	0	9518	0.545769	0.570803	0.538073	0.476734	0.532845	0	5055.5	0	0	4285	16	4463.5	3043	2524	704	0	1517.5	818	220.5	0	1722	329	0	4967	2567	1387.5	0	0	189	1062	0	3442.5	0	3860	321.5	1344	620	21	3141	70.5	172
F451	Pre V	0.09	19.7	15662.5	31126.5	12867.5	0	10146.5	0.488198	0.605436	0.493859	0.508214	0.523927	161.5	159.5	0	3178.5	78.5	1083.5	146.5	3870.5	3416.5	1287.5	1992.5	474.5	597	883.5	37.5	959.5	743.5	0	963.5	45.5	291.5	243.5	26.5	176.5	667.5	2214.5	477	0	43.5	1692.5	754	0	211.5	12.5	0	632.5
F451	Post V1	0.09	117	28992	45224	22459.5	0	18728	0.903677	0.879643	0.862003	0.938042	0.895841	90.5	127.5	0	4726	53.5	1613	116	6688	5334	1817	3309	659	978.5	1275	0	1440.5	1427	0	1331	0	518	302	0	232.5	1043	3690	626	0	90	2146	1639	0	305	0	0	690.5
F451	Post B1	0.11	84690	24326.5	39055.5	20596	0	15373	0.758254	0.759661	0.790482	0.769997	0.769599	712.5	91.5	0	16244.5	343	4085.5	489	6554.5	7152	3442.5	7641	309.5	2464.5	3309	0	3322.5	2759	0	3321	123	1393	769	26	656	2194	6931	1489	0	323	2042	3605	214	579	159	0	1371.5
F455	Post V1	32.1	29030	24390	46948	21014.5	0	11366	0.760233	0.913176	0.806544	0.569296	0.762313	16.5	0	0	1267	3114.5	238	1897	2249.5	2044.5	1453.5	372	1758	972	2281	0	1218	931	0	2699	1116	1039	0	93	266	573.5	530	1981	0	2114	1041.5	994	394	28	1704.5	344	560.5
F455	Post B1	20.8	>25000	27103	44185	22442	0	14796.5	0.844797	0.859434	0.861332	0.741122	0.826671	77	0	0	1923	2998.5	389.5	2078	2358.5	1588	1191	453	1517	963.5	1556	0	1199	679	0	2518	1184	1260.5	0	0	183	408.5	340	1708	0	1881	850	834.5	334	30.5	1823	497	758
F455	Pre V	0.1	0.4	14538	22244.5	13023	0	5673	0.453148	0.432673	0.499827	0.284147	0.417449	0	0	0	916	1783	0	1838.5	926	797	532	128	1189	296	1179	0	707	565	0	1607.5	539	649	0	0	0	161	78	886	0	792	293	265	0	0	1089	256	256
F457	Pre V	0.09	0.4	53572	81089.5	40692	0	40577	1.66983	1.57726	1.56177	2.03241	1.71032	0	0	0	0	416.5	31	463	706.5	1316	87	99.5	283	962	84	0	226	127	0	501.5	167	176	4	0	0	94	80	276	0	393	1763	53.5	38.5	756.5	227.5	12	28
F457	Post V1	0.09	913	35947	61983.5	29449.5	0	22814	1.12046	1.20563	1.13028	1.1427	1.14977	123	0	0	0	2087	289	1663	2208	2056.5	415	243	1213	5078	535.5	0	1218	713	0	2833	1039	649.5	11	0	0	637.5	369	1249	0	1568	1249	738	449	2977	1595	75	253
F470	Post V1	0.63	1500	36443	54099	28407	0	20509	1.13592	1.05227	1.09027	1.02725	1.07643	0	0	0	0	3931	0	3204.5	1558	1749.5	591.5	817	1238	552	180	0	1002	748	11380	3742	1270	539	0	0	0	70	60	1536	43308	2707	826	4110.5	14746	0	1709	0	0
F470	Pre V	1.14	0.43	31991.5	51094.5	24495	0	19215	0.997171	0.993829	0.940127	0.962434	0.97339	0	0	0	0	3559	735	3768	2532	2172.5	976	1219	2383.5	793	984	0	2493	1368.5	13565	4750	1370	1416	0	0	0	437.5	403.5	2456	45251	2928.5	1182.5	4739	12700	0	2577.5	356	159
F474	Pre V	0.07	4	42309	60837.5	39737	0	33630	1.31877	1.18334	1.52512	1.68445	1.42792	0	0	0	31	0	447.5	0	3738	3148	424	388	4014	580	912	0	465	9643	0	552	0	422	173	73	462	1023.5	2040	0	0	96	4835	445.5	0	605	55.5	0	163.5
F474	Post V1	0.08	3440	39749	58530	34273.5	0	31334.5	1.23897	1.13846	1.31543	1.56947	1.31558	0	0	3	0	38.5	609	79.5	2931	3513.5	543.5	619	4688.5	374.5	767.5	0	416	8307	0	359.5	0	464.5	44	26.5	411.5	987.5	2450.5	11.5	0	0	4626.5	390.5	0	554.5	14.5	0	731.5
F474	Post B1	0.08	51440	33200.5	38664.5	27690.5	0	24740	1.03486	0.752056	1.06277	1.23917	1.02221	0	0	0	0	39.5	390.5	169.5	2150	2109.5	357.5	336	3430.5	272.5	600	0	228.5	7634.5	0	183	0	362.5	2199.5	88.5	251.5	629.5	1589.5	13.5	0	15.5	3174.5	180	0	354	65	0	220.5
F485	Pre V	0.1	0.4	38555	63604	31024	0	24274	1.20175	1.23715	1.19071	1.21583	1.21136	0	0	0	0	5999.5	35	4485	6721	7067	1162	174.5	2714	1236.5	103	0	3088	2410	0	6613	2639	1761.5	0	0	0	684.5	0	3698	0	4347	946	1617.5	613.5	90	3985	0	984
F485	Post V1	1.58	3790	38650	61702	30970	0	23623	1.20472	1.20015	1.18864	1.18322	1.19418	526.5	0	0	0	5046	782	5151	6517	6219.5	1572	148	2930	1707	1148	0	2742	1960	0	5916	2665.5	2719	442	0	761	1461	453	3960	0	4171	1283	1128	1315	739	4393	826	577
F498	Post V1	0.56	3370	18931	26266.5	15276	0	8486	0.590077	0.510905	0.586298	0.425044	0.528081	0	0	0	204	135	28	255	783	1279	228	947.5	260	0	24	0	7	87	0	298	93	277	90	0	0	58	4218	219	0	272	376	0	64	16	141	0	804
F498	Post B1	0.43	57720	16808	22571	13569	0	7696.5	0.523903	0.439024	0.520783	0.3855	0.467303	21	0	0	84	206	0	110	614	925	129.5	550	258.5	42	0	0	22	53	0	265	110.5	276	66.5	14	40	56	1919.5	228	0	191	221.5	0	101.5	72	154	22	453
F498	Pre V	0.53	0.4	17111	25193	14272	0	7738.5	0.533348	0.490024	0.547764	0.387603	0.489685	0	0	0	226.5	264	53	156	816	1169	249	688.5	195	0	0	0	0	0	0	253.5	86.5	247	0	45	0	37	4192.5	204	0	241	390	0	48	10	221	0	656
F503	Pre V	8	6460	28315	50023.5	21668	0	16984	0.882575	0.972997	0.831625	0.850689	0.884472	325	21725.5	0	0	6562.5	540	5074	4838	4868.5	1384	1512	2192	719	476	0	2494	837.5	0	6544	3275.5	1149	0	0	133.5	812	0	3852	0	4889.5	305	1000.5	405	166	5145	141	0
F503	Post V1	15.6	14520	26705.5	49746	20299.5	0	16362	0.832407	0.9676	0.779102	0.819534	0.849661	28	19943	0	0	7920.5	370	6776	4882	4854	1217	1130.5	2424	1046.5	587	0	2270.5	959	0	7083	4154	1892.5	0	0	618	1246.5	0	4427	0	6086	46.5	1298.5	528	417.5	5333	88.5	745
F503	Post B1	78.9	>25000	22080	40184	16822	0	13470	0.688231	0.781611	0.645634	0.674681	0.697539	0	15651	0	0	5124	0	5216	2673	2515	1006.5	0	966	948	0	0	1880	598.5	0	5717	2737	1157	0	0	0	405	0	2890.5	0	3736.5	0	371.5	0	0	3723.5	0	0
F504	Post V1	0.08	4350	16809	29115	5101	0	3783	0.523935	0.56631	0.195778	0.189482	0.368876	0	0	0	0	1985	0	465	3725	2279	68	0	479.5	629	0	0	1344	360.5	0	1091	0	0	0	0	0	545	696	1243	0	3073.5	289	394	278	0	3580	0	0
F504	Post B1	0.09	>25000	34096	54278	27323	0	19757.5	1.06277	1.05575	1.04867	0.989607	1.0392	0	0	0	0	6644.5	357	5666	4174	4261	1452	0	1221	1626	454.5	0	2744	3749	0	5123	3333.5	2082	0	0	0	446.5	2322	4100	0	3651	742	701.5	0	0	4367	171.5	0
F504	Pre V	0.09	0.4	14381	39579.5	10972	0	9176	0.448254	0.769853	0.421109	0.459604	0.524705	0	0	0	0	5450	0	0	3755	2875	334	0	151	574.5	0	0	1696.5	0	0	3508	1561.5	1159	0	0	42	0	814.5	971	0	3528	0	0	0	0	3219	0	0
F509	Pre V	60.2	231	29295	49454	25679.5	0	12489	0.913122	0.96192	0.985588	0.625545	0.871544	0	0	0	0	6208.5	0	5474	3823	2876	651.5	0	1856	1474.5	261.5	0	1724	362	0	8164.5	3831	1503	0	2399.5	0	259	5033	3983	0	4585	0	784	0	377	5467	0	888.5
F509	Post V1	218	51420	23720	39104	18508.5	0	15661.5	0.73935	0.760604	0.710363	0.784448	0.748691	729.5	0	0	0	6379	0	5888.5	2841.5	2392.5	696	0	3391	1056	607	0	2211	513.5	0	6763	3192	1749	0	2119	397	800	4205	4008	0	4221	661	1284.5	0	204	4087.5	0	52
F510	Post V1	0.11	13.5	36860.5	64848.5	32142	0	25747.5	1.14894	1.26136	1.23362	1.28963	1.23339	641.5	0	0	1106.5	9736.5	0	8550	4952	5009	1862	0	2548	1945	1927	0	3695.5	1531	0	9644	5244	2527	0	0	215	2868	315	6191.5	0	7437.5	931.5	1364	9143	62	6345	236	1087.5
F510	Post B1	0.18	324	26302.5	45198.5	20791.5	0	16314.5	0.819846	0.879147	0.797985	0.817155	0.828533	61.5	0	0	240	7285.5	459.5	7565	3308.5	2694.5	1164.5	0	1675.5	1354.5	199	0	2313.5	322.5	0	7726.5	3659.5	1270.5	0	0	149.5	1057	0	4035.5	0	5594.5	345.5	1321	4329.5	0	4992.5	0	550.5
F510	Pre V	0.46	5.42	37143	62284	29704	0	23619	1.15774	1.21147	1.14005	1.18302	1.17307	443	0	0	916	8817.5	392	9592.5	5383	5443	1088	0	2303	1949.5	1263.5	0	3121	585	0	9556	4704	2182.5	0	0	352	2011.5	35.5	4987	0	6933	340	1272	7989	17.5	6683	0	1096
F521	Pre V	0.13	4.88	37895	63989.5	31329	0	23798	1.18118	1.24465	1.20242	1.19199	1.20506	223	0	0	0	8648	783.5	7968.5	7749	7393	1650	715.5	4065	1630	1097	0	3762	3707	0	7729	4097	1725	0	0	160	1016	852	5177	0	5561	1387	1684.5	1447.5	489.5	6080	732	1572
F521	Post V1	0.17	1900	37644	63061	31410.5	0	22640.5	1.17336	1.22659	1.20555	1.13401	1.18488	0	0	0	0	7379.5	0	6698	5829.5	5730	1070.5	444.5	2622.5	2103.5	752	0	2419.5	2657.5	0	7294.5	3780.5	1246.5	0	0	21.5	676	0	4338	0	5854.5	637.5	1078	1078.5	0	4870.5	52.5	73.5
F530	Pre V	9.94	97	43001.5	63045.5	34001.5	0	25850.5	1.34035	1.22629	1.30499	1.29479	1.2916	0	0	0	0	1467.5	93	1587	4730.5	7362.5	484.5	166	1348	782	339	0	970	5104	0	2114	510	781	242	0	0	286	365	1154.5	0	1221	1376	898	278	271	973	0	1430.5
F530	Post V1	6.47	43080	36982	56784.5	30472.5	0	21219.5	1.15272	1.1045	1.16955	1.06283	1.1224	0	0	0	0	1582.5	269.5	1434.5	4325.5	4796.5	549.5	376	1293.5	621	322.5	7.5	970.5	4865.5	0	2116	560.5	812.5	358.5	0	79	256	655	1200.5	0	1214	1287	653.5	253.5	327.5	1260.5	27	2334.5
F541	Post V1	0.08	313	40198	61309.5	33918	0	25458	1.25297	1.19252	1.30178	1.27513	1.2556	0	0	0	0	4237	64.5	4277.5	6217	6595.5	1420	0	4752	1819.5	1389	0	2360	756	0	4260	1337	1066	0	685	0	7564	668.5	1916.5	0	2715	1104	1093.5	0	157	2917.5	0	62
F541	Pre V	0.09	0.4	37931	56930.5	31306.5	0	24166.5	1.1823	1.10734	1.20155	1.21044	1.17541	182	0	0	0	6091	1888	4685.5	7591.5	8035	2524.5	1611	4673	2183	2126.5	0	4322	2786	0	5008	2047	2415	0	2203	147	1538	2438	2993	0	3315	770	1831	19	458	3291.5	0	1308.5
F578	Pre V	0.1	0.4	15052.5	33386.5	12245.5	0	8926.5	0.469185	0.649394	0.469987	0.447107	0.508918	0	0	0	0	3005.5	0	4413.5	2455	2821.5	369.5	0	1113.5	394	0	0	553	0	0	3480	2235.5	0	0	0	0	212.5	0	2452	0	2171.5	0	611.5	0	0	2584.5	0	0
F578	Post V1	0.07	2140	24328	42088	19288.5	0	12504	0.758301	0.818646	0.740299	0.626296	0.735885	0	0	0	0	6896	180	7141.5	3239	4411	918	0	1485.5	368	338	0	2297	0	0	6554	2660	1108	0	0	0	823.5	0	3255	0	4669	0	695	0	0	4880	0	172.5
F634	Pre V	41	86	24219	40899.5	19076	0	14199	0.754903	0.795528	0.732144	0.711195	0.748442	110	0	0	0	7109	1362	4766	4890.5	6700	1211	2824.5	2663.5	1420	1262.5	0	2192.5	2742.5	0	5766	2528	1811	0	0	0	19007	1279	3032	0	3781.5	649	1197	641	10	4044	196	1231
F634	Post V1	17.4	30450	23438	38362	18180	0	12571	0.73056	0.746172	0.697755	0.629652	0.701035	239	0	0	0	5025	1390	5270.5	4056	6577	1404	3833	2455	1307	509.5	0	2521	2876	0	5201	2286	1725	0	111	40	23644	1950	3397	0	3072.5	668	1286	447.5	101.5	3381	66	1022
F634	Post B1	10	15173	27016.5	43180.5	21414.5	0	16455	0.842101	0.839896	0.821896	0.824192	0.832021	388	0	0	0	5622	1372	6066.5	4981	6658.5	1487.5	3315	2492.5	1383	990	0	2325	2360	0	5942.5	3009.5	2032.5	0	0	278	22643	761.5	4003.5	0	4117.5	657.5	797	285.5	237	4456.5	361.5	838
F636	Pre V	0.07	0.4	22694	42187	18653	0	16192.5	0.707369	0.820571	0.715909	0.811044	0.763723	61	0	32	288	228	66	142	950.5	1569.5	366.5	313	810	58	48.5	0	92.5	158	0	356.5	54	217	99	119	0	111	52	215	0	150	3643	55	5.5	66	82	0.5	1221.5
F636	Post V1	0.09	1570	26081	42600.5	21627	0	17677.5	0.812942	0.828614	0.830052	0.885424	0.839258	23	160	0	377	177.5	111	103	968.5	2091.5	775.5	396	837	51	49	0	144	195	0	550	75.5	264.5	146.5	67	39	187	223	193	0	152	3797	35	0	29	89	0	1250
F649	Pre V	0.12	0.4	29547	39489	25081.5	0	19629	0.920977	0.768093	0.962637	0.983171	0.908719	172	0	0	0	4041.5	492	4200.5	4331	3665	1664	743.5	1954	996.5	523	0	2121	2214	0	4087	2040.5	1231.5	0	24	221.5	591.5	743	2510	0	2854.5	3922	723	642	58.5	3232	112	309
F649	Post V1	0.09	5300	30054	40191	25955.5	0	20250	0.93678	0.781747	0.996181	1.01427	0.932246	0	0	0	0	4385	545.5	3104	3520.5	1797	1619	486	1590	1082.5	168	0	1491.5	1566	0	3665.5	1586	1163	0	0	64	232	419	2297	0	2465.5	3473	417	0	0	2948	0	173
f659	Post V1	0.61	18600	35939.5	64099.5	30302.5	0	24700	1.12023	1.24679	1.16302	1.23717	1.1918	369.5	0	0	0	6391	0	4946.5	4383	5655	1429.5	0	1271	715	470	0	2061	626	0	5409	3076	1249.5	0	0	260	667	314	3904.5	0	4224	1917	876.5	217.5	344.5	4445	2	1290
f659	Pre V	1.18	42.9	43191	70054.5	36854	0	29852	1.34626	1.36262	1.41447	1.49522	1.40464	371.5	0	0	0	8516	84.5	6627.5	4764	3482.5	1269	0	1216.5	1426.5	442.5	0	3042	742	0	7218	4183	1252	0	0	526	1205	169.5	4741	0	5300.5	3450	1028	340	535	5690	184	1989
F660	Post V1	0.09	302	37441.5	64580.5	30002.5	0	30370.5	1.16705	1.25614	1.15151	1.52119	1.27397	0	6645.5	1518	0	2614.5	339	3346.5	3016.5	3159.5	1008.5	433.5	1589.5	510.5	1209.5	0	1619.5	1955.5	0	3612.5	1033	2464.5	4394.5	0	0	260.5	452.5	2052	0	2051	8480.5	1903.5	7056	143	1981.5	0	646.5
F660	Pre V	0.09	0.4	41587	68438.5	33138	0	32919.5	1.29626	1.33118	1.27185	1.64886	1.38704	0	6380	1434	0	3759.5	497.5	3289	3671.5	4407	1024	344.5	2002	540.5	1367	0	1534.5	2046	0	3029	993.5	2854	3319	0	0	293	561	2204	0	2481	10822.5	1853	8466	387.5	2198	0	1196
F661	Post V1	0.09	83.9	33303	47090	26644	0	21960	1.03805	0.915938	1.02261	1.09992	1.01913	165	0	0	0	2193.5	574	2258	6919	7898.5	679	680.5	2006	3406	624	0	1656.5	3220	0	3138	995.5	1357.5	1117	132	623	3719.5	1444	1263	0	1675	4554	1180.5	3381	1506.5	1743.5	283.5	476
F661	Post B1	0.07	50320	26309	37915.5	21120	0	17366.5	0.820048	0.737487	0.810593	0.869847	0.809494	118	0	0	0	1006	256	1107.5	4219.5	5110	389.5	444	1151.5	1880.5	322	0	930	1815	0	1489	537	889.5	588	0	238.5	1677	725	755	0	874	2679	472	1718.5	828	831.5	112	242
F661	Pre V	0.09	0.4	31158.5	42535.5	25235	0	20746.5	0.971207	0.82735	0.968528	1.03914	0.951557	125	0	0	0	1465	245.5	1546	5473	7026.5	555	433.5	1517.5	2803	595	0	1218	1931	0	2124	666	784	864.5	0	290	3104	1153	1113	0	1271	4556	1104	3124	1285	1106	218	125
F662	Post V1	4.21	2.12	27332	44552	21913	0	17735	0.851935	0.866572	0.841029	0.888305	0.86196	422.5	0	0	0	4997.5	199.5	4827.5	5058.5	4091	989.5	96	2257	1351	813.5	0	2886	5423.5	0	5632	3147	1663.5	0	324	302	1321	0	3628	0	4181.5	1349	1551.5	533.5	93	3900	219.5	1283
F662	Pre V	7.94	1.96	30063	46813	24576	0	19571	0.93706	0.910551	0.943235	0.980265	0.942778	76.5	0	0	0	6565	0	5594	5719.5	6445	1009.5	0	1901.5	1450	750	0	2424.5	5321	0	7061	3033	1474	0	442.5	199	626	0	3457	0	4491.5	1699	1446	500	104	4683	391	1415
F665	Post V1	0.08	824	24248	45578	19633	0	12816.5	0.755807	0.886529	0.753521	0.641948	0.759452	0	0	1633	7508	1572	99	1580.5	1301.5	2368	489	455	1872	795	297.5	0	839	1033	0	1890	498	914	0	0	0	175	453	1130.5	0	992	1721	592	0	161	979	0	496
F665	Pre V	0.09	0.4	37361.5	63742.5	29485.5	0	21495.5	1.16455	1.23984	1.13166	1.07666	1.15318	169	0	3098	13286.5	3224.5	593	3095	2341.5	2991.5	1234.5	697.5	2282.5	1135.5	743.5	0	1534.5	1527.5	0	3553.5	1276.5	1698.5	70.5	0	0	586.5	587.5	2093.5	0	1978.5	2147.5	724	305.5	387.5	1942.5	138.5	429
F666	Post V1	0.1	158	28223	46316	22104.5	0	16261	0.879708	0.900884	0.848378	0.814475	0.860861	143	0	726.5	0	4988	66	5056	5268	3805	1166	570.5	4201	3440.5	719	0	2237	7575	0	5900	2513.5	1759	0	0	309	752	222	3326	0	3875	1166	1413	727	1201	3721	381	851
F666	Pre V	0.1	8.74	25290	44002	20364.5	0	15233	0.788286	0.855874	0.781597	0.762985	0.797186	285	0	253.5	0	6356	201	5262	5087	5812.5	1039.5	516	3901.5	3031	695	0	2821	6277.5	0	6019	2442	1872	0	0	329.5	880	213	3498	0	4223	1381	1359	787	1003	3858	335.5	1069.5
F670	Pre V	68	1750	47920.5	72293	40700	0	32779	1.49368	1.40616	1.56208	1.64182	1.52593	166.5	0	0	4653	6236	355	5174.5	5810	3740	1561.5	60	3847	3074	453	0	2691	1311	0	5007.5	2961	1190	0	0	0	633	335.5	3671	0	3844.5	1987	1234	3144	3	4626.5	181	952
F670	Post V1	27.9	23920	19874	40377	17623.5	0	11685	0.61947	0.785365	0.676396	0.585274	0.666626	0	0	0	1652	3292	472.5	2128	2839	2793	700.5	36.5	2053	1471.5	575	0	1676	820	0	2638	1072	948	0	0	89	368.5	111.5	2064	0	1984	1013	608	1287.5	62	2419.5	105.5	403.5
F671	Pre V	0.19	0.4	21997	28314	16817.5	0	15129	0.685644	0.55073	0.645462	0.757776	0.659903	159.5	0	0	0	6235	0	5421	3923	2129.5	746.5	0	492.5	498	0	0	1999	0	2202.5	5826	3348	662	0	0	98	621	0	3113	2964	4410	2041	48	0	300.5	5184	135	0
F671	Post V1	0.16	3370	21448	27306	16556	0	13914	0.668532	0.531124	0.635425	0.69692	0.633	153	0	0	0	6004.5	0	4622	4309	1625.5	890	0	526	840	0	0	1765	0	1709	4590	3134	869.5	0	0	305	752	0	3549.5	2802	4393	1860	280	0	375	4457	598.5	0
F672	Pre V	0.09	0.4	29984	52416	25047.5	0	19032	0.934598	1.01953	0.961332	0.953268	0.967183	0	0	0	0	6079.5	25	5101	3410	3709	928.5	0	1536	1077.5	179	0	2416	169.5	0	4617.5	3065	989	0	0	121.5	710.5	0	2989	0	3759.5	788	717.5	453	385	4232	0	160
F672	Post V1	0.08	37.4	38571.5	65239.5	29502	0	22063	1.20227	1.26896	1.1323	1.10508	1.17715	0	0	0	0	6874	311	5666.5	5364	5328	1190.5	0	2087	1065.5	473	0	2520	673.5	0	6838	3250	1093	0	0	0	1338	0	3724	0	5344	926.5	796	246	397	4542	0	76
f677	Pre V	0.09	0.4	21189.5	33622	20581	0	17332	0.660474	0.653975	0.789906	0.868119	0.743119	101	0	500	19272	1760.5	350	1678.5	2490	3923	638.5	641	1215	633.5	737	0	1095	2826	0	2194.5	883.5	876	106	92	102	1247	832	1091	0	1338	2045	786	236	231	1217	393	255
f677	Post V1	0.07	1410	37368	39675.5	31812	0	27725	1.16476	0.77172	1.22096	1.38868	1.13653	0	0	3810	24993	3540	325.5	3600	6692	6401	1834	1607	1965	1222.5	835	0	1773	7735.5	0	4435	1748	1850	327	156	124	3663.5	1443	2498	0	2657	4509.5	1528.5	483	503	2411.5	607	455
F682	Pre V	0.09	0.4	31494.5	54902	24411.5	0	17512	0.98168	1.06789	0.936922	0.877135	0.965906	0	0	0	84	2284	149	2628	4675.5	4476	749	320	1081	1230	132	0	1209	349	0	2528	894.5	701	0	0	0	49	15939	1569	0	1518	1289.5	544	380	618.5	1621	0	0
F682	Post V1	0.07	3160	30002.5	54983.5	28671.5	0	19785.5	0.935174	1.06947	1.10042	0.991009	1.02402	0	0	0	344.5	3048.5	521.5	2584.5	5151.5	3872.5	1333.5	545.5	1413.5	995.5	400.5	0	1427.5	715	0	2382	1396.5	1082.5	0	0	227.5	521.5	16513.5	1918	0	2047.5	1501.5	928.5	698.5	639.5	2093.5	204.5	234.5
F684	Pre V	25.2	96.7	30287.5	32928.5	25960	0	17636.5	0.944058	0.640486	0.996354	0.883371	0.866067	10.5	0	0	0	912.5	347	585.5	2640.5	2800.5	8179.5	447.5	351.5	234	71.5	0	267.5	7375	0	445.5	175.5	1589.5	209.5	12	0	1007.5	488.5	363.5	124.5	279.5	1655.5	179.5	0	42.5	368.5	929	5021.5
F684	Post V1	22.3	3550	28886.5	30608.5	24030	0	15810	0.900389	0.59536	0.92228	0.791886	0.802479	20	0	0	0	858	320.5	747	2431	1549	5858	603	359	244	136	0	351	5456	0	470	286.5	1168.5	227	19	4	960	639	362.5	154	321.5	1187	129.5	10	38	547.5	594	2337
F685	Pre V	0.09	0.4	32817	38902	28822	0	17629.5	1.0229	0.756675	1.1062	0.88302	0.942199	51	0	0	0	4911	245.5	4545	3069	2995.5	989	101.5	2404	1126	817	0	2076	1229.5	0	5798	2383	1356	1046	0	44	873	0	3033.5	0	3989	799	1106	351	69.5	3691.5	268	457
F685	Post V1	0.07	4650	31563	36890	28337.5	0	17695	0.983815	0.71754	1.0876	0.886301	0.918815	0	0	0	0	5345.5	0	4435	3271	3229.5	989.5	0	1986	1078.5	262	0	2153	640	0	5490	2487	585	0	0	58	743	0	3232	0	3870	337	922.5	183	0	3745	0	0
F686	Post V1	36.5	37620	19118	36729	15789	0	12363.5	0.595906	0.714409	0.605987	0.619259	0.63389	59	0	0	0	2913	558	2741	6086.5	6200	1084	373.5	1680	939	441	0	1671	856	0	3781	1320	1288	0	0	0	408.5	1987	2137.5	0	1894	1620.5	945	235	301	1831	226	578
F686	Pre V	32.8	607	18787.5	19935.5	15302	0	11911	0.585604	0.387762	0.587296	0.596594	0.539314	145	0	0	0	2735	408	2495	5979	6316.5	1094	470	1495	997.5	550	0	1458	857	0	2954	1250	888	218.5	0	127	464.5	2654	1771	0	1868.5	1543	843	426	347	1663	0	631
F688	Pre V	0.1	0.4	29979.5	32045.5	24124.5	0	17833.5	0.934458	0.623311	0.925907	0.893238	0.844228	0	0	0	0	5926.5	0	5493.5	3390.5	3930.5	49	0	1587.5	156	0	0	2551.5	563	0	6581.5	2524.5	885.5	0	0	0	1128	0	3213.5	0	3979.5	847	606.5	0	2278.5	4103.5	0	0
F688	Post V1	6.16	116830	34177.5	38402.5	28001.5	0	19506.5	1.06531	0.74696	1.07471	0.977035	0.966003	0	0	0	0	5448	38.5	4842.5	2846	2528.5	900.5	0	5370.5	589.5	0	0	1636.5	4366	0	5690.5	2363.5	793.5	0	0	0	654.5	8.5	2765.5	0	4189.5	1077.5	4620.5	0	0	3854.5	0	0
F692	Pre V	0.1	0.4	14652.5	14392.5	12120.5	0	7595.5	0.456717	0.279946	0.465189	0.380441	0.395573	0	0	0	0	2001.5	0	1788	1433	1580.5	314.5	0	538	0	0	0	899	436	1302	2171	1341	214	0	0	0	0	0	1164	2198	1828.5	1347.5	0	0	171	1535	0	860.5
F692	Post V1	0.07	96.4	35818	59582	30009	0	21330	1.11644	1.15892	1.15176	1.06837	1.12387	403	0	0	3711	5659	746	5422	4734	4294	2034.5	327	2902.5	1159.5	562.5	0	2653.5	4438.5	0	5034	3082	1975	484	1601.5	283	453	352	4104	0	4350.5	2315	2361	693	264	4676.5	560.5	1095
F692	Post B1	0.21	19018	26679.5	45391.5	22305	0	15244.5	0.831597	0.882901	0.856074	0.763561	0.833533	172.5	0	0	1074.5	4798	444.5	4840.5	3614.5	3349.5	1174.5	376.5	1757.5	1263.5	714	0	2275.5	2606.5	0	4591.5	1889	1439.5	0	671	82.5	327.5	126.5	2615	0	2883	1061.5	1326.5	404	167.5	3168	359.5	884.5
F693	Pre V	0.1	0.4	36880	38923	29739	0	25400	1.14955	0.757084	1.14139	1.27223	1.08006	0	64	0	0	1092	43	1003	2696.5	4578	460	141	6219	208	164.5	14.5	797.5	2430	0	1226	98	483	624.5	0	0	170	129	585.5	0	688	4812	176.5	2046	361	705	0	120
F693	Post V1	0.07	1180	34457.5	35261.5	28477	0	23173	1.07404	0.685865	1.09296	1.16068	1.00338	0	255	0	0	1003	106	1130	2627	3038	402	367	6286	503.5	262	0	598.5	2316.5	0	1151	352	710.5	820.5	32.5	3	164.5	125.5	526	0	857	4589.5	176	1808	293	534	0	265
F707	Pre V	4.78	195	19028.5	29544	16468	0	11763	0.593116	0.574655	0.632048	0.589181	0.59725	132	0	425	2212	2275	489.5	2350	5234	3958	1037	450	1508	770.5	692.5	0	1168	801	0	2240.5	1132	1221.5	133	23.5	364	515	1078	1389	0	1625	1680	598	483	288	1776	273	453.5
F707	Post V1	1.77	12890	17917	29363	17561.5	0	13538	0.558471	0.571134	0.674017	0.678087	0.620427	0	0	0	1359	1598.5	401	1883	5668.5	3040	1101	250.5	932.5	588	425	0	1103	502	0	2117.5	622	1188	0	0	67	332	769	1142	0	1070.5	1664	490	322	328	1377	158	170
F727	Pre V	0.07	0.4	38487	38556	34492	0	23425	1.19964	0.749945	1.32382	1.1733	1.11167	78	0	0	0	1156	196	1094.5	1124	2729.5	786	330	784	542	376.5	0	698	620.5	0	1411	489	653	1088	12527	59.5	598	5588	702	0	842.5	2827.5	410	149	378	799.5	182	1082
F727	Post V1	0.09	1.57	40040.5	40408	36045	0	24806.5	1.24806	0.785968	1.38342	1.2425	1.16499	67	0	0	0	1024.5	230	831	1067	2785	1887.5	791	663	453	512	0	722.5	1088	0	1596	349	613	703	11423	54	923	6151	614	0	593	2216.5	502	139	269	588	201.5	811
R005	Pre V	0.1	0.4	40796	66292.5	34298	0	25596	1.27161	1.28944	1.31637	1.28204	1.28987	77.5	0	0	0	4688.5	575.5	4928.5	4108.5	3286	1424.5	375.5	2112.5	1293.5	588	0	2289.5	1270.5	0	5076.5	2460.5	1339	0	0	59.5	609.5	6792	2930.5	0	3564.5	1747.5	897.5	200.5	405	3563	308.5	441
R005	Post V1	0.07	0.4	33234.5	53233	26966.5	0	21927	1.03592	1.03542	1.03498	1.09827	1.05115	32.5	0	0	0	3804	401	4178.5	2556.5	3207.5	1124.5	71.5	1624.5	1432.5	548.5	0	2021.5	959.5	0	4140.5	2014.5	1251.5	0	0	35.5	458.5	1746	2500.5	0	2750	1144.5	858.5	108.5	230.5	2957	264.5	5.5
R005	Post B1	0.08	0.4	31086.5	51865.5	26024	0	20387.5	0.968963	1.00883	0.99881	1.02116	0.99944	0	0	0	0	3778.5	0	3549.5	2056.5	1756.5	486.5	0	1315.5	189	70.5	0	1628.5	417	0	3607	1120.5	798.5	0	0	0	0	2258.5	1972	0	2273.5	580.5	118	0	0	2339.5	0	0
R006	Pre V	0.1	0.4	35396	44637.5	30608.5	0	23078	1.10329	0.868235	1.17476	1.15592	1.07555	333	0	0	1054.5	6423.5	853.5	4500.5	5928.5	4956.5	4743.5	542.5	1892	1098.5	768	0	2741.5	1141.5	0	5103.5	3245.5	1919.5	0	0	299.5	741.5	3707.5	3627.5	0	3455.5	1762.5	1924.5	542.5	6855.5	3904	357.5	377.5
R006	Post V1	0.09	174	29770.5	37450.5	26361	0	18038	0.927943	0.728442	1.01174	0.903481	0.892903	250	0	0	1241	4265.5	1060	3779.5	5163	9132.5	4814	904	1882	1226.5	832	0	2215	1445	0	4452	2340	1843	0	0	301	778.5	3775.5	2764.5	0	2687	1648	1500.5	383	5410	2709	335	505.5
R007	Pre V	0.09	0.4	38764.5	62390.5	30648.5	0	22119	1.20828	1.21355	1.1763	1.10789	1.1765	238.5	0	799	49177	3127.5	183.5	2300.5	5066	5819	1232.5	489.5	3728.5	577.5	53.5	0	1244	647	0	2042.5	2021.5	830	0	0	75	3516	6	1844.5	0	1560.5	1435.5	992.5	302.5	571.5	2222	81.5	491.5
R007	Post V1	0.09	1310	36975	57076.5	31579	0	23382.5	1.15251	1.11018	1.21201	1.17117	1.16147	0	0	462	46411	3494	319	3027	4969	2413	1194	342	3993	407.5	318	0	1179	781	0	1834	1573	721	0	0	97	3434	234	1759.5	0	1463	1455	839	178	449	2233.5	251	1171
R008	Pre V	2	422	36605	59634	29843.5	0	21405	1.14097	1.15993	1.1454	1.07213	1.12961	0	0	0	0	7741.5	0	6326	3580	3890	953	0	3796	1382	0	0	2732.5	0	0	7780	3465	734	0	0	0	82	434	4523	0	5441	408	502	0	0	5082	0	0
R008	Post V1	1.25	9280	33109.5	44933.5	29218	0	19769.5	1.03202	0.873993	1.1214	0.990208	1.0044	162	0	0	0	8801	284	7863	4802	6321.5	1025	0	5202	3383	555	0	3236.5	522.5	0	8176	4353.5	1656.5	0	0	38.5	1235	1932	4537	0	6356	1196.5	1161	409	654	6437	402	350.5
R010	Pre V	0.09	0.4	46924.5	71262.5	37557.5	0	32437	1.46263	1.38611	1.44147	1.62469	1.47873	133	0	0	0	3177.5	267.5	3294.5	5459.5	6036.5	5275.5	117.5	5451	598.5	391	0	1371.5	839.5	0	3387.5	1480.5	1186.5	3.5	0	77.5	295.5	282	1780	0	2228.5	2002.5	896.5	330.5	520.5	2173	198.5	310.5
R010	Post V1	0.06	872	45104	70359.5	37239.5	0	31534	1.40589	1.36855	1.42927	1.57946	1.44579	37	0	0	0	3191	107	3026	5055.5	5353	5430	210.5	5767	798	498	0	1336	1014	0	3411	1445	1389	27	0	99	401	360.5	1957	0	2151	2076	839	169	588	2029	189	636
R011	Pre V	0.1	0.4	33562.5	57062.5	26984.5	0	30979.5	1.04614	1.10991	1.03567	1.55169	1.18585	0	658.5	0	16997	3151.5	53.5	2681	1633.5	1602.5	693.5	30.5	1073.5	1194.5	335.5	0	1006.5	913	0	2091	1167.5	762	0	0	780.5	220	113.5	1746.5	0	1987	9735.5	203.5	227.5	262.5	2003.5	63	677.5
R011	Post V1	0.15	25	32400.5	52582.5	24318.5	0	28968	1.00992	1.02277	0.933353	1.45094	1.10425	165	617.5	0	16833.5	3601.5	403.5	3403.5	3179	2241.5	773.5	382.5	1492.5	1534	778	0	1297.5	1379.5	0	3175.5	1401.5	1090.5	0	0	546.5	435.5	246.5	2091.5	0	1982.5	12199.5	652.5	234.5	378.5	2696.5	330.5	476
R011	Post B1	0.13	9310	21886.5	36397	16571	0	19556	0.6822	0.707951	0.636001	0.979514	0.751416	113.5	166	0	21564.5	2142	179	1249	1543	1002	600.5	112	874	569	359	0	714	721	0	1288	849.5	597	35.5	0	517	232.5	234	1196.5	0	1229.5	7411	239	91	206	1343	239	402
R012	Pre V	0.09	0.4	39246	54135.5	32450	0	20855	1.22329	1.05298	1.24544	1.04458	1.14157	0	38.5	25	0	0	82	137.5	2153	1939	316	29	2056	45	0	313	9	9319	0	0	0	181.5	80	785	23	7998	25	0	0	0	1362	0	1402	252	0	0	95
R012	Post V1	0.08	3900	32996	45314	27566.5	0	17257.5	1.02848	0.881394	1.05801	0.864388	0.958069	0	65.5	0	0	79.5	0	85.5	1924	2444.5	277	156.5	1975	0	0	174	0	8804.5	0	0	0	221.5	153	444.5	0	6364	48.5	0	0	83.5	1029.5	0	1185	255.5	0	0	184.5
R012	Post B1	0.07	45930	21983.5	33164.5	19205.5	0	9811	0.685223	0.645076	0.737114	0.49141	0.639706	0	13.5	8.5	0	0	0	0	1172.5	947.5	100	0	668	0	0	62.5	0	4597.5	0	0	0	33.5	26.5	315	0	3961.5	0	0	0	0	650	0	666	60.5	0	0	107
R014	Pre V	0.1	0.4	34290.5	54127.5	28641.5	0	18723.5	1.06883	1.05282	1.09927	0.937816	1.03969	259.5	0	0	0	5928.5	557.5	6350.5	5249.5	4983	1373	775.5	2783.5	1757.5	1095.5	0	3307.5	1465.5	0	6807.5	3088.5	1837	0	0	169.5	750	0	3736.5	0	4370	1320.5	1411.5	678	240.5	4142.5	925.5	1106.5
R014	Post V1	0.06	0.4	27419.5	46373	22712.5	0	14764	0.854663	0.901992	0.871714	0.739494	0.841966	33	0	0	0	5292	214	5465.5	4245	4021	960.5	383	2660	1758.5	1243.5	0	2228.5	1162	0	5368.5	2072.5	1423.5	0	0	0	668.5	0	3361	0	3584	1026	1266.5	693.5	47	3292	370	876
R017	Pre V	0.1	0.4	45341	70562	37511	0	31335	1.41327	1.37249	1.43969	1.5695	1.44874	0	429	1	0	0	14	7	673	1357	55	169	564.5	35	15	31	4	138.5	0	0	39	199	155	28	0	0	16618	0	0	45	1615.5	0	0	475.5	0	297	96.5
R017	Post V1	0.07	379	46965	72048.5	40168	0	34107	1.46389	1.4014	1.54166	1.70834	1.52882	0	386	23	0	21.5	24	20.5	623.5	1709.5	44	173	640	19	0	10	21.5	133.5	0	0	0	258.5	163	24.5	0	3	16634	0	0	24	1604	0	0	443	0	283.5	78
R019	Pre V	0.21	0.4	33237.5	57013	26395.5	0	23181.5	1.03601	1.10895	1.01307	1.16111	1.07978	400	0	197.5	48230.5	8015.5	620.5	6808.5	6102.5	5392.5	2179.5	307.5	4154	2436	916.5	0	2845.5	2344.5	0	6654.5	3656.5	2136.5	0	3.5	287.5	1700.5	1022.5	4431.5	0	5113.5	3322	1498.5	901.5	567.5	5119.5	281.5	600.5
R019	Post V1	0.27	188	33189	57331.5	26209	0	24258	1.0345	1.11514	1.00591	1.21503	1.09264	110	0	1113	44772.5	6915	331	6623	5576	5639	1770	45	3389.5	1649.5	647	0	2827.5	2209.5	0	6039	3149	2259.5	0	0	0	1331	944	3890	0	4716	3025	1299	825	426	4465.5	192	548
R019	Post B1	3.62	12000	32136.5	53580.5	25673	0	22355.5	1.00169	1.04218	0.985339	1.11973	1.03724	219.5	0	0	22470	3909.5	637.5	3918.5	3924	4633.5	1029	284.5	2257.5	1480	739.5	0	1794.5	1504.5	0	4272.5	1647.5	1595	0	144.5	239.5	803.5	484.5	2635.5	0	2693	1648.5	1336	480	579.5	2648.5	290.5	220.5
R021	Pre V	14.4	970	28494.5	46713	22904	0	19195.5	0.88817	0.908606	0.879064	0.961458	0.909324	133	0	0	0	8254	0	8648	3597	3958	889	0	2106	462	0	0	3027	1555	0	8338.5	4858	1990	0	0	0	607	0	4965.5	0	6493.5	306	1339	336	94	6323	0	407
R021	Post V1	47.4	5980	22308.5	40562	19519	0	15294.5	0.695353	0.788964	0.749146	0.766066	0.749882	0	0	0	22630	4608	0	5597	2493.5	2559	1159.5	0	2346	455	363	0	1694.5	1169.5	0	5349	2889	1223.5	0	0	90.5	506	877.5	3221.5	0	4439	1074	895	405	179	4126	0	253.5
R021	Post B1	27.1	>25000	17127	31867	14350	0	10759	0.533847	0.619839	0.550758	0.538893	0.560834	193	0	0	6601	5584.5	127	5436	2329	2698	785.5	0	1576	821.5	0	0	1764	1159	0	4940.5	2448.5	1168	0	0	131.5	464	0	2880	0	3614.5	717.5	590	289	165	3432.5	238	0
R023	Pre V	0.06	0.57	17987.5	26689.5	16782	0	11899.5	0.560668	0.519132	0.644099	0.596018	0.579979	1.5	0	0	0	523.5	121.5	491.5	629	435	236	85.5	215.5	234.5	78.5	0	354.5	185.5	0	497.5	254.5	170	0	9.5	0	58.5	264	308.5	0	331.5	561	48.5	128.5	83	398.5	54	22.5
R023	Post V1	0.06	266	18129	26624	17486	0	12738.5	0.565079	0.517858	0.671119	0.638042	0.598024	0	0	0	0	659	95	583	678	638.5	221.5	107	277	253.5	78	0	291	155	0	616	246	126.5	0	0	0	0	221	375.5	0	344	384	108	25	0	370	0	0
R025	Pre V	0.1	0.4	42018	66894.5	35118.5	0	28747	1.3097	1.30115	1.34786	1.43987	1.34964	199.5	0	0	0	3558	650.5	3735.5	3303.5	2806.5	1958.5	380.5	1053.5	1364.5	792.5	0	2118.5	1112.5	0	3479.5	1811	788	0	0	227	536.5	273.5	2379.5	0	2368	1612.5	1001.5	424.5	172	2547	356.5	712.5
R025	Post V1	0.07	1210	45625	69078.5	36980.5	0	27348.5	1.42213	1.34363	1.41932	1.36982	1.38873	94.5	0	0	0	4360.5	303	3850.5	3156	3310.5	1604.5	2	311.5	1210	535.5	0	2105	311.5	0	3818.5	1914.5	544.5	0	0	64.5	214.5	0	2163.5	0	2316	1886	1394.5	0	171	2657.5	0	256.5
R025	Post B1	0.07	188120	31712.5	50207	26007	0	16295	0.988475	0.976567	0.998158	0.816178	0.944844	37.5	0	0	0	2427	332	2008.5	2344	2352.5	1792.5	393	854	905	477	0	1192	580.5	0	1941	837	751	0	0	125	172.5	258.5	1351	0	1231	1166	672.5	112	149	1242.5	13	607
R026	Pre V	0.11	0.4	44414	66581.5	35252.5	0	33071	1.38438	1.29506	1.353	1.65645	1.42222	442.5	0	0	0	7625	623	7035	6554	3903	1566	315	5157.5	1606	623.5	0	3157	1164	0	6961	3741.5	2666	0	0	245	1473	3153	4409	0	5818	4905	1405	616	557	5332	839	616.5
R026	Post V1	0.15	211	31930.5	51928.5	25835	0	21231.5	0.99527	1.01005	0.991556	1.06344	1.01508	0	0	0	0	4551.5	0	4457.5	3256	2259.5	776.5	0	3483.5	1021.5	66.5	0	1939	492	0	4636.5	1924.5	1228.5	0	0	0	1362.5	1649	2490.5	0	3288.5	2539.5	659.5	146.5	26.5	3303.5	58.5	6.5
R027	Pre V	0.1	0.4	46835	75764.5	38237	0	31739	1.45984	1.47368	1.46755	1.58973	1.4977	24	0	0	0	2693	207	2813	7829	14943	628.5	110	1063	12757.5	255	0	1421	593	0	2714	1377	808.5	0	1285	344	425	1712	1673	0	1722	2521.5	1080	341	5563	1809	212	134.5
R027	Post V1	0.07	182	44563	72149	34988	0	27744.5	1.38902	1.40336	1.34285	1.38966	1.38122	102	0	0	0	2693	271.5	2188.5	7137.5	19754.5	864	54.5	1145	13614	498	0	1243	686	0	2126	1410	1006	0	1006.5	266	450	1733	1694	0	1538	2613	1297	218.5	5524.5	2011	199	124
R027	Post B1	0.07	222590	36754.5	61150	29659.5	0	24551	1.14563	1.18942	1.13834	1.2297	1.17577	278	0	0	0	1688.5	205	1423	6062	9822	454	396	695	11762	301	0	935	390.5	0	1766	1023.5	633	143	629	288	361.5	808	1265	0	955	1750	852	189.5	4056.5	1233	233	182.5
R029	Pre V	0.15	0.4	29360.5	50529.5	23735.5	0	18936.5	0.915163	0.98284	0.910977	0.948485	0.939366	0	0	0	0	5760.5	762.5	4548.5	9990.5	6246.5	1725.5	231.5	2234.5	1244.5	436	0	1967.5	3702.5	0	6243.5	2418.5	1363.5	0	6.5	41	633	77	3539	0	3437	1953.5	1327	281.5	264.5	4082.5	276.5	708.5
R029	Post V1	0.13	0.4	31695	54907	25955	0	18733.5	0.987929	1.06799	0.996162	0.938317	0.997598	0	0	0	0	6274	300	4807	10103	6656	1260	0	2057	1438	134	0	2677	3716.5	0	6069.5	2365.5	1402.5	0	0	0	87	0	2951	0	4246	1906	976.5	0	0	3581	0	195
R029	Post B1	0.8	246	33600.5	56021	26747	0	20410	1.04732	1.08965	1.02656	1.02229	1.04646	0	0	0	0	4944.5	256.5	5012	9408	4318	1093.5	206	1615.5	926	399	0	2110.5	3234	0	5950	2482.5	1342	0	0	0	382	0	3102	0	3543	1955	930	0	55	3721	92	81
R032	Pre V	0.1	0.4	28761.5	35419.5	23342.5	0	20530	0.896493	0.688938	0.895893	1.0283	0.877406	0	0	0	0	6268.5	0	5117.5	4388	1915.5	0	0	0	0	0	0	767	0	0	5253.5	2971.5	0	0	0	0	0	0	3106.5	0	4868	3340.5	0	0	0	4134	0	0
R032	Post V1	0.07	862	27557	33825.5	22116	0	20348	0.858948	0.657933	0.84882	1.01918	0.846221	0	0	0	0	8418	0	8341.5	5821	2315	216	0	200	206.5	0	0	1315	0	0	6860.5	4278	676.5	0	0	0	351	0	4088.5	0	6102.5	5127	0	0	0	5238	0	0
R033	Pre V	0.1	0.4	33678	44033	28489	0	21257	1.04974	0.856477	1.09342	1.06471	1.01609	196.5	0	0	0	1364	862	1186.5	4580	5354	1081	800	673	2109.5	684.5	0	1104.5	2489	1246.5	1658	514	664.5	431.5	119	111	211.5	2413.5	926	0	1061	3272	1105	0	447.5	855	0	173
R033	Post V1	0.07	91.4	35851.5	44691.5	29354.5	0	21800.5	1.11749	0.869286	1.12664	1.09194	1.05134	0	0	0	0	1358	520.5	1529.5	4924.5	7175.5	776	153.5	820.5	1326.5	350	0	869	1530.5	616.5	1631	806	615.5	15.5	0	79.5	156.5	1458.5	862.5	0	1305.5	2326.5	590	0	438	946.5	0	262.5
R033	Post B1	0.07	2040	27883	41234	23578	0	17642.5	0.86911	0.802035	0.904932	0.883671	0.864937	53	0	0	0	1445	457	1408	3802	4305.5	680.5	429	805	841	325	0	738	1245	0	1452	461.5	487	50.5	76	141	186	1189	831	0	1017.5	1649	494	111.5	332	885	0	202
R034	Pre V	0.09	0.4	29635.5	46339.5	22437.5	0	16743.5	0.923735	0.901341	0.861159	0.838643	0.881219	24	0	0	0	572.5	146.5	836	1908.5	3467.5	274.5	754.5	698.5	1589.5	210.5	0	322.5	322.5	0	699.5	264.5	361.5	55.5	83	252	213	902	441.5	0	440.5	1598.5	264.5	117.5	829.5	486.5	0	154
R034	Post V1	0.07	652	27464.5	44202.5	21518.5	0	14926	0.856065	0.859774	0.825888	0.747608	0.822334	0	0	0	0	755.5	71	796	1604	2256	260	690	659	1284.5	155.5	0	371	384	0	674.5	239	399.5	2	96	225	166.5	884	429	0	514	1394.5	421	84	715	484	0	206
R035	Pre V	13.3	515	28599.5	47163	23789	0	16878	0.891443	0.917358	0.91303	0.845379	0.891803	47.5	0	0	0	1663	400	1447	1316	2766.5	853	226	990.5	2632	345.5	0	781	728	0	1305.5	570.5	502	0	3	136	190	3274	888.5	0	899.5	1081	275.5	63	1189	973	3398.5	190.5
R035	Post V1	6.12	61270	30959	50119	25288	0	17252	0.964988	0.974855	0.970562	0.864112	0.943629	33	77	0	0	1422.5	436	1176.5	1800.5	2830	1038	203	1070.5	2792	533	0	898	893	0	1258	533.5	719.5	27.5	34	167	172	3528	836	0	1055	1215.5	504	158	1051	924.5	2865	416
R036	Pre V	0.07	0.4	25827	48029	21580	0	16057.5	0.805025	0.934203	0.828248	0.804282	0.842939	0	0	0	0	4789	0	5595	2986	2823	416	0	2175.5	598	453.5	0	1722	307.5	0	5838.5	3163	1679	0	0	0	227.5	0	2579	0	3779	1314	570	0	0	3802.5	0	32
R036	Post V1	0.09	225	30112	52934	23959	0	18701	0.938588	1.02961	0.919555	0.936689	0.95611	406	0	0	0	7091	524	6660	4610.5	3109	1285	0	3790.5	1577	459	0	2391	932	0	7895	4193	2392	262	613	31.5	1278.5	0	4132	0	5807	1575	1010.5	358.5	202.5	5544	535	925
R036	Post B1	2.1	>25000	27071	46656	22089	0	16441	0.8438	0.907497	0.847784	0.823491	0.855643	79.5	0	0	0	5937.5	105	6573	3159.5	2762	738	0	2948	1181	293	0	2221	972	0	6518	3613	1930	0	20	0	297.5	0	3412	0	4498	895	1217.5	164	0	4226	29	843.5
r037	Pre V	0.09	0.4	23094	32151.5	21647	0	19466	0.719837	0.625373	0.830819	0.975006	0.787759	232	0	0	0	4040	95	2864	1306	2040	1986	39	1607	248.5	311	0	1605.5	537	0	3108	1872.5	770	128	0	347	1243	0	2086	0	1757	5740	213	560	198	2763	300	315.5
r037	Post V1	0.07	0.4	30926	35426	25036.5	0	24497	0.96396	0.689064	0.96091	1.227	0.960233	0	0	0	0	6188	108	4437.5	4425	2916	1854.5	0	2054	457.5	136	0	1546	268	0	4612	2457	1305	0	0	0	1016.5	0	3009	0	3626.5	9151	613	629	38.5	3446	320.5	1064
r038	Pre V	0.09	0.4	36458.5	62484	30386	0	23693	1.13641	1.21536	1.16623	1.18673	1.17618	0	0	0	0	9753.5	184	9815	4877	4068	1660	0	4301.5	2038	328	0	3438	1047.5	0	9878	4803	2437	0	0	0	940	5739	5485	0	6459.5	577.5	2033	293	0	7463.5	302	1066
r038	Post V1	0.07	319	34241	58015.5	28030.5	0	21831	1.06729	1.12845	1.07582	1.09346	1.09126	0	0	0	0	8432.5	673.5	9742.5	5909.5	6424.5	1920.5	0	3691.5	2107.5	1185.5	0	3100	1340	0	9067.5	3803.5	2328	0	0	135.5	1142.5	5654.5	4947	0	6186.5	904.5	1742.5	395.5	130.5	5894.5	412.5	1020.5
r040	Pre V	0.15	0.4	42295	66047.5	35224	0	27509	1.31833	1.28468	1.35191	1.37786	1.33319	103.5	0	0	0	3676.5	2956.5	4589.5	4692.5	8630.5	38977.5	128.5	1648.5	830.5	515	0	1535.5	1104.5	0	3668.5	1635.5	974.5	0	0	69.5	438.5	0	1713.5	0	2208	1834.5	800.5	475	204.5	1858.5	109.5	151.5
r040	Post V1	0.15	208	40583	66573.5	34314.5	0	25888.5	1.26497	1.29491	1.317	1.29669	1.29339	0	0	0	0	2887	1896	3899.5	4245.5	7979.5	33671.5	0	1425.5	546.5	162.5	0	1180.5	972.5	0	3110.5	1271.5	665	0	0	0	220.5	0	1622	0	1520.5	1699.5	638	254	0	1765.5	1	59.5
r040	Post B1	0.16	2674	33151	57133.5	25024	0	22062	1.03331	1.11129	0.96043	1.10503	1.05252	0	0	0	11192	4139	0	3498	2363.5	2609	1018	0	5313.5	1321	253.5	0	1628	494	0	3152.5	1558.5	729	0	0	0	0	0	1865	0	2436	2895	113.5	0	431	2664	0	49
R041	Pre V	0.09	0.4	44774	71993	35073.5	0	31595	1.3956	1.40032	1.34613	1.58252	1.43114	0	0	0	0	0	23	21	465.5	2007	424	0	1233	658	0	0	0	84	0	0	0	0	0	16	0	0	0	0	0	42	2928	0	0	24	0	0	0
R041	Post V1	0.07	1730	42709	68665	34030	0	29920	1.33123	1.33559	1.30608	1.49862	1.36788	0	0	9	0	58	46.5	135	390	2192	424	0	841	423	37	65.5	48	178	0	0	0	43	0	46.5	0	0	1	0	0	67	3732	0	0	157.5	3	0	129
R042	Pre V	0.09	0.4	36090	58958	29006.5	0	25735	1.12492	1.14678	1.11328	1.28901	1.1685	0	0	0	14335.5	4740	176	3828	3188	2347	678	0	5940	1944.5	0	0	1453	357	0	3919	1961	1075	0	0	0	65	0	2177.5	0	2640.5	3202.5	394.5	0	763	3161	0	0
R042	Post V1	0.08	0.4	36849	58810.5	28423	0	25771.5	1.14858	1.14391	1.09088	1.29083	1.16855	132	0	0	15691.5	4511.5	73.5	4889.5	3405.5	2991	1094	0	6683.5	1714	365.5	0	1872.5	436.5	0	3954.5	1753	1216	0	0	0	171.5	0	2547.5	0	3145.5	3256.5	726.5	88.5	688.5	2967	0	269
R043	Pre V	0.09	0.4	34462	56033	28102	0	22041	1.07418	1.08989	1.07856	1.10398	1.08665	327	0	0	0	9628.5	287	8549.5	8773	4940.5	1952	0	3903	3265.5	447	0	3202	1307.5	0	10213	5284	1947	0	0	23.5	1334.5	0	5620	0	7255	1379	1503.5	1175	1921	6385.5	872.5	2699
R043	Post V1	0.07	0.4	31385	53542	26633	0	22706	0.978267	1.04144	1.02218	1.13729	1.04479	0	0	0	0	8411	0	9851.5	7956	6208	1471.5	0	2534	3204	626	0	2961.5	528	0	9756	4085	1690	0	0	0	541	0	4393	0	5983	379	1467.5	683	1501	6389.5	221.5	2581
R044	Pre V	8.33	641	28788	50485	23759	0	17158.5	0.897319	0.981974	0.911879	0.859429	0.91265	515.5	0	0	0	9375	0	8262	4497.5	3119.5	1206	0	1907	591	313	0	3156.5	56.5	0	8570	4877.5	1015	0	0	92	1357	0	4801	0	6530	0	1692.5	867	522	5818	0	137
R046	Pre V	0.09	0.4	26980.5	50881.5	25660	0	18049	0.840979	0.989686	0.98484	0.904032	0.929884	0	0	0	14439.5	5219.5	166.5	5499.5	8995	2953.5	941.5	0	1432.5	1182	0	0	1355.5	1484.5	0	5152.5	2061.5	518.5	0	0	0	76.5	3102.5	2264.5	0	3046.5	894.5	610.5	105.5	0	2988.5	240.5	0
R046	Post V1	0.08	568	29719	54998	23313.5	0	19674.5	0.926338	1.06976	0.89478	0.98545	0.969081	284	0	0	20696	5767	488	4852	9425	5372	1558	205.5	1752	1375	593	0	1760	1936	0	4978	2551	1109	0	159	0	648	3157	2996	0	3604	910	970	556	473.5	3803	344	118.5
R046	Post B1	0.09	>25000	20682	38855	15930	0	11547	0.644656	0.755761	0.611399	0.578362	0.647544	32	0	0	31175	3833	343	3120	6454	4214.5	760	191.5	1525	918.5	247	0	1636	1149	0	4368	1477	1259.5	0	0	0	402	2149	2371	0	2319	407	592.5	291	156	2263.5	98	82.5
R049	Pre V	0.09	0.4	43563.5	68556	33530.5	0	30545.5	1.35787	1.33347	1.28691	1.52995	1.37705	101	0	0	25471.5	5242.5	70.5	4246.5	3612	2591	5047	23	1408.5	718.5	199.5	0	1720.5	3394	0	4578.5	2562.5	797	0	0	83.5	587.5	4383.5	2648.5	0	3253.5	1831	679.5	355.5	271	3597	535	135.5
R049	Post V1	0.08	57.5	43943	69566	32577	0	30327	1.3697	1.35311	1.25032	1.51901	1.37303	0	0	0	11848.5	2896	226	2803	2356	2417	4336.5	93	1322	350	115	0	1172.5	2741	0	2954.5	1532.5	589	0	0	0	377	4452	1989.5	0	2014	1684	649	154	170	2125.5	207	0
R053	Pre V	283	901	39570.5	60613.5	32211.5	0	25955	1.23341	1.17898	1.23629	1.30003	1.23718	610.5	0	0	4527.5	7054.5	777.5	7034.5	6829.5	5746.5	2750.5	280.5	1931	1114.5	639.5	0	3030.5	1263.5	0	6983.5	3812.5	1578.5	0	0	522.5	941.5	34565	4060.5	0	4567.5	1955.5	1381	578.5	920.5	5367.5	698	409.5
R053	Post V1	2.89	37300	31707.5	51131.5	25990.5	0	21145.5	0.988319	0.994549	0.997524	1.05913	1.00988	194.5	0	0	3069.5	5687.5	653.5	5144	5761.5	4098	1996.5	212.5	1924.5	1173.5	270.5	0	2404.5	858.5	0	6136.5	2463.5	1618	0	0	100	779.5	30421.5	3097	0	3879.5	1202.5	941	610.5	673.5	3763.5	494.5	54
R054	Pre V	0.09	0.4	31507	52136.5	25170	0	18810	0.98207	1.0141	0.966033	0.942149	0.976087	0	0	0	0	4531	175	4976.5	3073	2174	839	0	2198	1269	380	0	1725.5	701.5	0	5135	2058.5	1597	0	0	0	335	643	3060	0	3469	479.5	717.5	0	0	3406	0	1187
R054	Post V1	0.07	2.46	31501	51913	25577.5	0	19091.5	0.981883	1.00975	0.981673	0.956248	0.982389	198	0	0	0	5475	500.5	5890	3622	4256	1327	303.5	3207	1468.5	569	0	2399	1246	0	5989.5	2659	2566	0	0	175	732.5	1141	3568.5	0	3917	933	1341	357	548	3906	513.5	2329
R059	Pre V	0.09	0.4	17705	28255	15593	0	7768	0.551863	0.549583	0.598465	0.389081	0.522248	902.5	0	9	37	99	14	0	392	852	40.5	128	123	158.5	106	0	24	292.5	0	56	0	20.5	187	95.5	16	43	242	0	0	15	866	0	0	53	0	0	85.5
R059	Post V1	0.06	47.3	12483.5	12588.5	16798.5	0	5604.5	0.389109	0.244856	0.644732	0.280716	0.389854	421	12	9	92	134	2	0	135.5	518	48.5	115.5	122.5	106.5	40	0	2	149.5	0	10	2.5	23	136.5	89.5	21.5	10.5	187	0	8	32.5	616.5	0	18.5	14.5	0	7	65.5
R060	Pre V	0.08	0.4	5346	15594	6844	0	4023	0.166634	0.303316	0.262675	0.201503	0.233532	124.5	0	0	0	2915.5	217	2029	2385	2219	159	1	1097.5	407	249	0	1367.5	606	0	3663	391	981	0	0	10	297.5	655	1075	0	2246	362.5	762	588.5	136	1604.5	106.5	64.5
R060	Post V1	1.25	68.9	26334	13256	21042	0	5639	0.820828	0.25784	0.807599	0.282444	0.542178	0	0	0	0	3218	0	2978	1550	565	519	0	1401	582	0	0	585	0	0	2437.5	1074	547.5	0	0	0	128	317	650.5	0	2260	864.5	209	115.5	196	2147	0	0
R063	Pre V	0.1	0.4	24036	48557	20683.5	0	13042	0.749199	0.944473	0.79384	0.653243	0.785189	6.5	1109	23	0	173	53.5	131.5	2328	2484	202.5	90	786	207	37	0	158	743	0	243	96	108.5	37	0	27	59	111	162	0	190	838	346.5	0	238	121.5	0	152.5
R063	Post V1	0.1	208	27749	43224.5	22996	0	15049	0.864933	0.840751	0.882595	0.753769	0.835512	53	1590.5	64	0	327	94.5	269	3522.5	1802	271	153	752.5	173	49	20.5	259	1153	0	426	165	163	96	18	86	293	218	256	0	240	1041	396.5	40	303	218.5	21	321.5
R063	Post B1	13.9	>25000	37275	57411	29170	0	22259	1.16186	1.11669	1.11955	1.1149	1.12825	18.5	1431	43.5	0	275.5	0	340.5	3889	5256	305.5	131	650	111	16	0	241	900	0	335.5	152.5	220	68	0	33	501	161	254	0	218	1956.5	385	0	433	191.5	0	313
R064	Pre V	0.08	0.4	13135.5	29296.5	11233.5	0	6149	0.409432	0.569841	0.431146	0.307989	0.429602	189	0	0	0	3197	185	2128.5	2493.5	1238	614	152	1793	1748	476	0	835	527.5	0	3608	2012	652	0	0	0	221	0	1587.5	0	1652	68	427	306	655	1884	255	120
R064	Post V1	0.07	0.4	31876.5	48626	27456	0	17721	0.993587	0.945815	1.05377	0.887603	0.970194	277.5	0	0	0	4723	158	4660.5	4238	3232	1099	0	1808	4447	378	0	2028.5	712	0	5125	2888	900	0	0	0	499	118	3489	0	3598.5	984	633	1064	1755	3582.5	333	355.5
R064	Post B1	0.08	15181	35502	56533	29004	0	22346	1.10659	1.09961	1.11318	1.11926	1.10966	0	0	0	0	7407	0	5716	5274.5	2461	969	0	1786.5	3780	514	0	2310	425	0	6463	3504.5	1244	0	0	0	291	0	3700.5	0	4487.5	929	527	954	1332	4604	214	47
R065	Pre V	0.09	0.4	29108.5	46236.5	23000.5	0	16801.5	0.907309	0.899337	0.882767	0.841548	0.88274	2	0	0	0	2296.5	84.5	1769	5961	3151.5	1029.5	0	1591	994.5	748.5	0	1298.5	4249.5	0	2507.5	838	1270	130.5	91	120.5	212.5	930.5	1242.5	0	1782	1064	852.5	186.5	438.5	1519.5	152.5	475.5
R065	Post V1	0.08	347	24597	44791	20224	0	12487	0.766686	0.871221	0.776204	0.625445	0.759889	0	0	0	0	1702	288	1897.5	4166.5	2521	872.5	155	1275	533	182.5	0	1290.5	2428	0	1626	617.5	1156.5	156	0	86	327.5	712.5	1121	0	1287	945	535	0	313	1136	287.5	96
R067	Pre V	0.08	0.4	34517.5	57741	25804	0	23129	1.07591	1.12311	0.990367	1.15848	1.08696	729.5	0	11846	14	6883.5	886	6381	4453	2155.5	2686.5	684.5	3254.5	850.5	1166.5	0	2648.5	742.5	0	4665.5	3108.5	2285	1166.5	0	1144.5	9565.5	130.5	4219	0	4677	2854.5	1637	912.5	799.5	5018.5	1276.5	843.5
R067	Post V1	0.07	24.3	32798	56780	25658	0	23224	1.02231	1.10442	0.984763	1.16324	1.06868	198	0	13104.5	0	5210	171.5	4741	4611.5	4273	1761	925	2419	893.5	353.5	0	1857	1063	0	5177	3043	1853	953	0	350.5	7798	0	3395	0	4276	2204	1112	777.5	0	4372	184	534
R069	Pre V	0.1	0.4	35811	55809	28464	0	24010	1.11622	1.08553	1.09246	1.2026	1.1242	0	0	0	2088	4178	0	5421	3342	3121	589	0	2753.5	126	288	0	1892.5	3881	0	4127	1457	1267	0	0	0	0	0	2286	0	3162	442	307	0	0	3267.5	0	0
R069	Post V1	0.1	9.11	35756	56581	29075	0	23105	1.11451	1.10055	1.11591	1.15728	1.12206	0	0	0	2090	4956	229.5	4743	3941	4160	1054.5	0	3810	488	688	0	2328	4020.5	0	5027	1760	1098	0	0	0	0	0	2668.5	0	3166.5	929	568.5	0	0	3557.5	0	197
R070	Pre V	0.09	0.4	29828.5	47094	25901.5	0	18439.5	0.929751	0.916016	0.994109	0.923591	0.940867	0	0	0	0	8120.5	0	6967	3070.5	1138.5	693	0	5161	153.5	0	0	1137	0	0	7055.5	4685	260.5	0	0	0	106.5	0	3756.5	0	5882.5	0	0	0	0	5433.5	0	0
R070	Post V1	1.15	5400	28198	42961.5	24490.5	0	16259	0.878928	0.835636	0.939954	0.814375	0.867223	357	0	0	0	8027	0	5528	2435	1187	64	0	4429	0	0	0	1384	0	0	7422	3806.5	370.5	0	0	0	13	0	3345	0	5305	0	0	0	0	5094	0	0
R071	Pre V	0.67	68.8	33264.5	48200	27340.5	0	20418	1.03685	0.937529	1.04934	1.02269	1.0116	251	0	4755.5	32541	214	265	382	1632.5	2632.5	946	359.5	345.5	3591	299	0	440	717	0	394.5	33.5	53504	34539	157	209	13	609	392.5	0	216	2212	245	77.5	2204	216	0	580
R071	Post V1	0.44	5910	30365	50409	24659.5	0	17989	0.946474	0.980496	0.94644	0.901027	0.943609	65.5	0	5024	76009	113	232.5	183	1622	3561	801	449	315.5	3008	145	0	317	643	0	301.5	0	58973	42120	82	103	0	613	301	0	191	2052	142	47	1905	141	0	481
R072	Pre V	0.1	0.4	37123.5	42531	30798	0	19273	1.15714	0.827262	1.18204	0.965339	1.03294	190	0	0	0	2557	309	2335	7079	7079.5	8010	169.5	1343.5	886	198	0	1338.5	985	0	2745	1151	824	0	0	42	313	33	1335.5	4862	1617	1778	686	626	267	1707	85	489.5
R072	Post V1	0.07	7.93	37259.5	44641.5	31956.5	0	20568.5	1.16137	0.868313	1.2265	1.03023	1.0716	167.5	0	0	0	2254	135.5	1860.5	7165	6385	6875.5	129.5	1251.5	816	462	0	1204.5	822.5	0	2497.5	1155.5	936.5	0	0	171.5	367.5	0	1506.5	3304.5	1875.5	1509.5	603.5	660	327.5	1604.5	137.5	538.5
R072	Post B1	0.08	115	31990.5	42505.5	27650.5	0	19453.5	0.99714	0.826766	1.06124	0.97438	0.964881	897.5	0	0	0	3060	222.5	2455.5	6440.5	5828.5	6002.5	329.5	1033	773.5	449.5	0	1225.5	808.5	0	2334.5	1253.5	770	0	0	122.5	334.5	66.5	1310	3829.5	1678	2997.5	597.5	518.5	327.5	1618.5	225	400
R075	Pre V	0.09	0.4	16208	23579	12972	0	11586	0.505201	0.458631	0.49787	0.580316	0.510504	0	840	0	0	1413.5	190	1591	2064	2763	528.5	200	1055.5	342	252	0	973	1539	0	1761	659	700	7103	0	5	246.5	8410.5	905.5	0	1136	2172	486	129	412	1029	53.5	2490
R075	Post V1	0.07	259	26002	38124.5	20721	0	16795	0.810479	0.741552	0.795279	0.841222	0.797133	22	992	0	0	2586	437	2405.5	5934	8810	917	523	1577	1240	487.5	0	1567	2841	0	3165	1316.5	1111	20055	0	32	586.5	14453	1733	0	1936.5	3169.5	917	415.5	806	1757	146	3377.5
R076	Pre V	0.1	0.4	31114	53477	25213	0	17361	0.96982	1.04017	0.967684	0.869572	0.961812	171	5894	0	0	21103	47737	30081	10278	7098	19369.5	550	7160.5	1125.5	452	2111	1205.5	2561	0	2709.5	850	2106.5	1921	170	142.5	578	11074.5	2112.5	0	1676	1656	2423	502	262	1419.5	64.5	21172
R076	Post V1	0.1	68.4	31248.5	54002	26381	0	17312	0.974012	1.05038	1.01251	0.867117	0.976006	49	6661	0	0	18896	46609	28608	9874.5	9305	18735	452	7761	1042.5	484	2171	816	2218	0	2733	601	2157	1468.5	25	8	363	10318.5	1972.5	0	1579	1497	3114.5	288	86	1236.5	182	21812
R077	Pre V	0.1	0.4	26664	47558	20017	0	17284.5	0.831114	0.925041	0.768259	0.86574	0.847539	8.5	0	442	32014	6230.5	192	5062.5	6213	5795	1176	288	3249	1908	1019	0	2826	4612	0	5998	2810	2016	0	1.5	142.5	1028	664	3392	0	4436	1680.5	1498	716.5	523	3813.5	291.5	333
R077	Post V1	0.33	3680	26660	47209	20575	0	16006	0.830989	0.918253	0.789676	0.801703	0.835155	145	0	0	17257.5	7756	0	7236	8587.5	5956	1012	0	3190	957	266.5	0	3183	4605	0	8440	4037	1913.5	0	0	0	550.5	0	4089	0	5131	1031	1274	209	229	5297	200.5	397
R079	Pre V	0.11	0.4	29503	51775	22983	0	19080	0.919605	1.00707	0.882096	0.955672	0.94111	112	0	24670.5	11343	1256	252	1269.5	1885.5	2021	512	185	2574	278	255	0	754	902.5	0	1478	569.5	592	3	0	53	261.5	2151	985	0	1022	1303	373	163.5	265	979.5	75.5	120.5
R079	Post V1	0.08	916	32755	54521	26900	0	21183	1.02097	1.06048	1.03243	1.06101	1.04372	3	0	25419	3404	1320	213	1403	2357.5	2597	454.5	243	2254	465	265	0	727	868	0	1553.5	646	685	28	0	55.5	336	2656.5	884	0	974	1652.5	305	152	359	876	109	293
R080	Pre V	0.1	0.4	35095	59019	28046	0	19459	1.09391	1.14797	1.07642	0.974656	1.07324	11	0	0	0	1187	193	1338	2067	1815	342	137	906	515	153	0	611	691	0	1552	439	634.5	49	0	10.5	165	235	750	0	779.5	1384	426	219	209	725.5	83.5	166.5
R080	Post V1	4.91	10.3	15551	26939	12364	0	8418	0.484723	0.523985	0.474535	0.421638	0.47622	263	0	0	25251.5	2775	351	2739.5	2580	2595	1086	79.5	1525	1107	514	0	1342	1079	0	2864	1325	1133	18.5	83	42	881	850	1854	0	2052	1170	583	582	306	1895	89	466
R082	Pre V	14.9	82.5	21910.5	40737	17594	0	14817	0.682948	0.792368	0.675264	0.742149	0.723182	142	0	0	0	3463.5	372	2880	4767	2455	1625	552.5	2298	952.5	416	0	1641	1419	0	3514	1578.5	1007	0	0	222.5	744.5	3201.5	1964	0	2195	1924	1039	480.5	354	2262.5	556	472.5
R082	Post V1	11.6	15450	26494.5	47698	21982.5	0	18194	0.82583	0.927765	0.843696	0.911295	0.877146	0	0	0	0	3807	192.5	4326	4663.5	4990	1606	148	2347.5	1223	714	0	1725.5	1316	0	4661	1786.5	1416	0	0	0	571	3204	2353	0	2577	1716	937	482.5	129	2805	15	124.5
R086	Pre V	0.09	0.4	23484	43988	20235.5	0	15357.5	0.731994	0.855602	0.776646	0.769221	0.783366	48	886	0	1788	2769	281	2388	2551.5	4363	644	290	1431	837	394.5	0	1200	788	0	3178	1152	995	379	0	361.5	419	66	1760.5	1433.5	2177	1077	775	293.5	265	2184	344.5	94
R086	Post V1	0.06	0.4	23614	38641	19974.5	0	15316	0.736046	0.751599	0.766628	0.767142	0.755354	85.5	1288.5	0	1603	2432.5	100	2924	2540	2682	687	284	1039	781	199	0	1018	808	0	2276	993.5	468.5	593	20	85.5	507	84	1394	706.5	2038.5	1215	629	298	243	1643	260	286
R087	Pre V	0.11	0.4	31068	37658	26086	0	19565	0.968386	0.732478	1.00119	0.979965	0.920505	17	0	0	0	3024	160.5	2634	1470	2962	1014	64	1243	271	329	0	1206	431.5	0	2304.5	1744	535	0	0	343.5	237	0	1500	1216	1937.5	4231.5	499	291	262	1925.5	234.5	35
R087	Post V1	0.09	2420	35597	39442.5	28732	0	22658.5	1.10955	0.767188	1.10274	1.13491	1.0286	101.5	0	0	0	2809	365.5	3093	2026	3066	1263	0	1054	555.5	251	0	1171.5	665	0	2540	1527	577.5	0	0	442	209.5	0	1808	1243	1918	5195	263	31	0	2115.5	42	76
R089	Pre V	0.1	0.4	25591	36360	21630.5	0	19725.5	0.797668	0.707231	0.830186	0.988004	0.830772	1089.5	0	0	0	7350	0	5809.5	2634.5	0	0	0	0	0	0	0	932	0	0	6437.5	5649.5	0	0	0	0	631.5	0	3524.5	0	6931.5	3137	0	6258.5	0	6108.5	0	0
R089	Post V1	0.07	647	27241	46275	20285	0	22167.5	0.849099	0.900086	0.778545	1.11032	0.909512	1479.5	0	0	0	9493	0	10905.5	2746	1572	200	0	0	665	588	0	2138.5	0	0	9516	6779	646	0	0	377.5	3233	0	5370	0	9562	2244	0	8345	0	7493	0	317
R093	Pre V	0.1	0.4	29087	47443.5	23151.5	0	16929.5	0.906638	0.922814	0.888563	0.847959	0.891494	0	0	0	0	5807	1207.5	4432	2636	3447.5	1752	0	1450.5	467.5	541	129	1993	5194	0	4057	1328	926.5	0	0	0	0	0	2118	0	2399	1097.5	181	0	0	2845	0	3
R093	Post V1	0.08	0.4	34783	54643	27160	0	20112	1.08418	1.06285	1.04241	1.00736	1.0492	0	0	0	0	7303	2176	5399	3115	3652	2794	132	2227	863	925	350	3004	6801.5	0	4631	2516	1648	0	0	0	113	362	3111	0	3659.5	2036.5	891	0	0	3405	0	250
R094	Pre V	0.1	0.4	24586	44848	20751	0	16619	0.766343	0.87233	0.796431	0.832407	0.816877	0	0	0	0	7669	0	7042.5	4306.5	2583	698	0	1939	1697	0	0	2477.5	227	0	7091	4264	925	0	0	0	760	0	4311	0	5809	915	580	11325	121	5114	0	0
R100	Pre V	0.09	0.4	26193.5	41140.5	21050.5	0	15483	0.816448	0.800216	0.807926	0.775507	0.800024	0	0	0	0	5494	546.5	5597.5	4512.5	4547.5	1092.5	0	1918.5	758.5	343.5	0	2243.5	813	0	5456.5	2873.5	1890.5	0	0	0	401.5	0	3610.5	0	4277	350.5	1073	433.5	0	4279	323.5	881
R100	Post V1	0.07	606	28216.5	22442	22878	0	15669	0.879505	0.436515	0.878066	0.784823	0.744727	0	0	0	0	4668	219	3625	3592	5125.5	935	0	1145	163	483	0	1552	288	0	3954.5	2534	1401.5	0	0	0	358	0	2665	0	3042.5	171	671	628	0	3429	24	605
R101	Pre V	0.09	0.4	27370	41617	20804	0	17635	0.85312	0.809484	0.798465	0.883296	0.836091	0	2320	169	2953	8012.5	14609.5	2927	11767	14036.5	3918.5	539.5	318	1422	197.5	0	731	519	0	601.5	324.5	644	140	88	1177	275	2128.5	577.5	0	456	2437.5	1598.5	26	585.5	678	0	627
R101	Post V1	0.07	101	28722	50143	22809.5	0	18596	0.895261	0.975322	0.875437	0.93143	0.919362	0	2541	186	3464.5	8090.5	14633.5	2946	12689	16966	3984	614	522	1560	375	82	1176	821	0	695	362	811	390.5	281	1273.5	340.5	2361	704	0	499.5	2947	1566	86	825.5	874.5	0	532
R106	Pre V	0.17	34.6	34704	49237	26806	0	22041.5	1.08172	0.957699	1.02882	1.10401	1.04306	0	0	0	0	7311.5	0	6088	3383.5	2702	614.5	0	1322	525.5	0	0	1809	1815	0	5385.5	3506	819	0	0	0	405	687	3358	0	4119	517	48	0	0	4200	0	0
R106	Post V1	0.13	50710	33687	57772	25697	0	21587	1.05002	1.12371	0.98626	1.08124	1.06031	70.5	0	0	0	8554	455	8303.5	4147	2484	1346	964	2760	1092	92	0	3151	2432.5	0	7248	4726	2103	0	0	180	851	1100.5	4593.5	0	5483	696	1297.5	507	0	5988	548	9.5
R108	Pre V	0.1	0.4	28668	35877	21251.5	0	19599	0.893578	0.697837	0.81564	0.981668	0.847181	0	0	0	0	7601	7083.5	8210	3499	1829	0	0	0	0	0	0	531.5	0	0	5545	5348	0	0	0	357	1323	0	3436	0	6210	0	0	0	0	5543	0	0
R108	Post V1	0.11	1030	20628.5	27436	16690.5	0	14452	0.642988	0.533652	0.640587	0.723867	0.635274	0	0	0	0	7295	5800	5614.5	3156	2675	562	0	0	0	0	0	735	0	0	5068	3730.5	0	0	0	647	872	0	3237	0	5701	0	0	453	0	4776	0	0
R117	Pre V	0.09	0.4	32755.5	51250	26396	0	21321.5	1.02099	0.996854	1.01309	1.06794	1.02472	153.5	0	2689.5	6688.5	5381.5	531.5	4409.5	4767	2934	1737.5	0	2835	1285	438.5	0	2112	1402	0	4308	2121	1293.5	0	162.5	170.5	955	160.5	2945.5	0	3766.5	1479.5	841.5	1795.5	425.5	4236.5	642.5	657.5
R117	Post V1	0.07	0.96	14764	28456.5	15759.5	0	6341	0.460192	0.553502	0.604855	0.317606	0.484039	0	0	1435.5	1854	1823	0	2960.5	1951.5	2117.5	712.5	0	1122.5	376.5	46	0	1393.5	682.5	0	2007	902	426.5	0	0	0	413.5	0	1917	0	1654.5	579.5	527.5	907.5	0	1620.5	0	0
R117	Post B1	0.07	>25000	34681	47791	28676.5	0	22007	1.081	0.929573	1.10061	1.10228	1.05337	1326	0	11154	8167	6714.5	714	4486	6011	6895	2155	570	2110	2221.5	1661.5	0	2349	1810	0	5482	2638	1736	0	754	2827.5	943	0	3568	0	7614	2612	742	3168	296	5148	1142	992
R119	Pre V	0.15	0.4	25689.5	43621.5	20730.5	0	14910	0.800739	0.848473	0.795644	0.746807	0.797916	100	0	0	0	1438	304.5	1572.5	1511	3192	593.5	285.5	1136.5	432.5	390.5	0	854.5	583.5	0	1637.5	742.5	706.5	1784.5	83.5	196.5	277.5	164.5	1055.5	0	1142.5	1162.5	486.5	206.5	253.5	979.5	168.5	799.5
R119	Post V1	0.16	553	34998	55145.5	28156	0	20373	1.09088	1.07262	1.08064	1.02044	1.06615	0	0	0	0	2221	146.5	1973.5	1512	3809	917	50.5	1055	520.5	189	0	867	592	0	2206	784.5	655	2875	0	0	140	67	1117	0	1417	1162.5	582	52.5	191	1387.5	0	677.5
R149	Pre V	0.08	0.98	34163	58868	26655.5	0	25576	1.06486	1.14503	1.02305	1.28104	1.12849	0	0	0	0	5936	173	4133	2632	2510	1605	0	1971	649	567	0	1542	1240.5	0	5061	2094	960	0	0	0	337	0	2414	0	2979	5173	382	171	0	3262	93	0
R149	Post V1	0.06	1.24	21608.5	35912.5	15237	0	14571.5	0.673534	0.698527	0.584801	0.729852	0.671679	0	0	0	0	1956.5	142.5	2381.5	1151.5	1334	496	0	1168.5	350.5	0	0	860.5	705	0	1539	518	161.5	0	0	0	73.5	0	951.5	0	1744.5	2727.5	213.5	0	0	1082.5	0	0
			Mean	32082.2	51411.8	26055		19965
			Median	32020.8	50652.4	26069		20282.4
[truncated: 122 more columns]
